# Supplementary material for: Global aerosol simulations using NICAM.16 on a 14-km grid spacing for a climate study: Improved and remaining issues relative to a lower-resolution model
Source: Copernicus journal article supplement (doi:10.5194/gmd-2020-34), 2020-02-26
Supplement: Supplementary file [file gmd-2020-34-AC1-supplement.pdf]

Referee #1

[C1-1] This manuscript presents one of the first multi-year simulations with an aerosol–climate model at a resolution approaching the convective “grey zone”, in this case using the NICAM atmospheric model with the SPRINTARS aerosol scheme at a grid spacing of 14km. The study compares the meteorological fields, aerosol mass and optical thickness, and aerosol radiative forcing, between this configuration and a lower-resolution version of the same model. They additionally consider the output from the high-resolution model coarsened to the lower resolution to distinguish the effects of simulation vs data resolution. In many respects, this is a therefore a significant and illuminating study and very much appropriate for publication in GMD. However, there is one major point as well as a number of minor points which should be addressed before acceptance:

[A1-1] Thank you so much for reviewing our manuscript and give us much plentiful comments to improve our manuscript. According to your suggestions, we brushed up our manuscript. Through the revision, we moved and added some figures to the supplement including 9 tables and 16 figures. We also fixed errors in the calculation of global averages (and statistical parameters) used in wind speed, AOT and RF. In addition, we modified Figure 1 (typo: AOD→ AOT), Figure 2 (fixed errors of average values), Figure 3b (change: warm-topped cloud fraction → warm-topped COT), Figure 3c (change: warm-topped COT → cloud fraction in all clouds), Figure 4 (changed the name: Global Radiation→SSR), Figure 5 (added three panels obtained from MODIS/Aqua and fixed errors of average values), Figure 6 (typo: N=182, 186 and 272 → N=91, 83 and 136), Figure 7 (typo: Seasalt → Sea salt), Figure 9 (typo: Seasalt → Sea salt), Figure 15 (fixed errors of average values and added error bar) and Figure 16 (significantly modified, but the values used in this figure have not changed).

### Major points

[C1-2] The main area of concern with this study relates to the ability of a 3-year simulation to adequately capture interannual variability. The very large (and zero-containing) confidence intervals quoted up front in the abstract, e.g. -91% to +18% and -49% to +223% suggest that this is simply not a long enough period to adequately constrain what are presented as headline results. If this is to be presented as a major advance in its own right compared to single-year high-resolution simulations, rather than merely a technical step towards a long enough simulation to produce robust interannual statistics, this needs to be clearly quantified and justified in the study. Alternatively, it might be more appropriate to submit results when a longer and more statistically-significant dataset is available, if the conclusions drawn from 3 years do not add appreciable confidence to those from single-year studies.

[A1-2] Thank you for your comments. We actually mentioned that “the differences in the simulated aerosol concentrations at polluted sites during polluted months between the HRM and LRM are estimated with medians of -23% (-63% to -2.5%) for BC, -4% (-91% to +18%) for sulfate and -1% (-49% to +223%) for the aerosol optical thickness (AOT).” The expression in the range has confused you. These ranges do not represent confidence intervals, but only the minimum and maximum values at various sites and months, as shown in Figure 13 in the original manuscript. Since the samples used in Figure 13 in the original manuscript were not randomly selected (just select the highest concentration for each region and month), the range from minimum to maximum represents their spatiotemporal variations. This range cannot be narrowed by the long-term integration of the model, since the spatiotemporal variations do not depend on the integration period. In addition, we thought that quantifying the difference between sites and time periods using the normalized mean bias (NMB) was more important than estimating the median values for different sites and time periods. Therefore, we newly calculated the NMB and modified the abstract as follows: “Additionally, the differences in the simulated aerosol concentrations at polluted sites during polluted months between the HRM and LRM are estimated with normalized mean biases of -19% for black carbon (BC), -5% for sulfate and -3% for the aerosol optical thickness (AOT)” Finally, as you pointed out, the advantage of the results of integration over 3 years instead of 1 year was not clearly quantified and justified in the abstract, although these were discussed in section 4.5. Therefore, we modified the contents in section 4.5 (please see the revised manuscript directly) and added the following conclusion to the abstract in the revised manuscript: “The analysis of interannual variability revealed that the difference in reproducibility of both sulfate and

carbonaceous aerosols at different horizontal resolution is greater than their interannual variability over 3 years, but those of dust and sea salt AOT and possibly clouds were the opposite.”

[C1-3] There are also a very large number of figures in the paper, and I would strongly recommend condensing to a smaller number that illustrate the important results, and moving additional plots to the supplement if they do not contribute to the main conclusions.

[A1-3] Thanks for your suggestion. We considered this and decided to move Figure 6 (global distributions of the statistical metrics for AOT), Figure 8 (global distributions of the differences in the AOTs) and Figure 10 (global distributions of the differences in the surface mass concentrations) to supplement. Through the revisions, we prepared some additional figures to support the discussion and added them to supplement.

### **Minor points**

[C1-4] p.2, line 7: while 56km is a fine resolution compared to most global aerosol–*climate* models, it is coarser than some of those used for operational global aerosol *forecasting*, as collected in the ICAP initiative, for example.

[A1-4] Yes, you are right. We first added “aerosol” to the abstract as follows: “For comparison, a NICAM with a 56-km grid spacing is also run as an LRM, although this horizontal resolution is still high among current global aerosol climate models.” We also modified one sentence in section 1 as follows: “This 14-km horizontal grid boasts the finest resolution among all global chemistry models and is generally finer than most regional chemistry models (Galmarini et al., 2018). To effectively show the advantages in the simulated parameters related to aerosols in the HRM with a 14-km horizontal grid, we also executed an LRM with a 56-km horizontal grid, which is still finer than most global aerosol climate models (Myhre et al., 2013; Galmarini et al., 2018) but coarser than some of those used for operational global aerosol forecasting (Sessions et al., 2015).”

[Additional references]

Sessions, W. R., Reid, J. S., Benedetti, A., Colarco, P. R., da Silva, A., Lu, S., Sekiyama, T., Tanaka, T. Y., Baldasano, J. M., Basart, S., Brooks, M. E., Eck, T. F., Iredell, M., Hansen, J. A., Jorba, O. C., Juang, H. - M. H., Lynch, P., Morcrette, J. -J., Moorthi, S., Mulcahy, J., Pradhan, Y., Razinger, M., Sampson, C. B., Wang, J., and Westphal, D. L.: Development towards a global operational aerosol consensus: basic climatological characteristics of the International Cooperative for Aerosol Prediction Multi-Model Ensemble (ICAP-MME), *Atmos. Chem. Phys.*, 15, 335-362, doi:10.5194/acp-15-335-2015.

[C1-5] p.2, lines 12–13: what does “column burden of the aerosol wet deposition” mean?

[A1-5] We changed from “column burden of the aerosol wet deposition” to “the aerosol wet deposition flux”.

[C1-6] p.2, line 13: should this be “cloud to precipitation” rather than the other way around?

[A1-6] Thanks. This should be “cloud to precipitation”.

[C1-7] p.2, lines 17–18: it is not clear why “differences. . . between the different horizontal grid spacings are not explained simply by the grid size” follows from the results quoted above as suggested. Is this related to the coarsened-HRM data, which hasn’t been mentioned yet at all in the abstract?

[A1-7] Thanks for your comment. As you pointed out in [C1-21], the definition of secondary and tertiary products is unclear. After the revision of [A1-21], we modified it as follows: “These findings indicate that the impacts of higher horizontal grid spacings on model performance for secondary products such as sulfate, and complex products such as the AOT, are weaker than those for primary products, such as BC.”

[C1-8] p.2, line 25–p.3, line 1: what are the confidence intervals on these ARF values, and therefore are the differences statistically significant?

[A1-8] The differences are statistically significant. To explain it, we calculated the confidence intervals using the annual average global grid data as a sample data. If we set at a global confidence intervals with a significance threshold of 95%, these ARF values with the uncertainties are estimated to be  $-0.293 \pm 0.001 \text{ Wm}^{-2}$  (RFari for HRM),  $-0.919 \pm 0.004 \text{ Wm}^{-2}$  (ERFaci for HRM),  $-0.239 \pm 0.002 \text{ Wm}^{-2}$  (RFari for LRM) and  $-1.101 \pm 0.013 \text{ Wm}^{-2}$  (ERFaci for LRM). The uncertainty of the HRM is smaller than that of the LRM because the number of samplings is 16 times higher (due to different number of grids). We incorporated these estimates to the abstract. We also added such uncertainties to section 4.4 in the revised manuscript.

[C1-9] p.3, lines 4–6: it is commonly found that tuning parameters require quite different values at different model resolutions; therefore any suggestion that tuning using the LRM can be applicable to the HRM or vice versa requires proper justification.

[A1-9] Thank you for your comment. Indeed, the tuning parameters need different values for different model resolutions. We thought it over and decided to remove this comment from the revised manuscript. Alternatively, we modified the end of the abstract as follows: “Because one-tenth of the computer resources are required for the LRM (56-km grid) compared to the HRM (14-km grid), these findings in this study greatly help the modelers to decide whether the objectives will be archived by using a model with such higher resolution or not under the limitation of the available computational resources.”

[C1-10] p.8, line 2: does this really mean monodisperse particles of a single fixed size as suggested, or the more usual unimodal size *distribution* with a fixed mode and width?

[A1-10] This means the monomodal size distribution with a fixed mode radius shown in the manuscript, but the width of the aerosols (and the size for sulfate) was not mentioned in the original manuscript. We modified it as follows: “...whereas those of BC, POM and sulfate are assumed to be monomodal with single fixed sizes (the radii are  $0.1 \mu\text{m}$  for internally mixed BC with POM,  $0.08 \mu\text{m}$  for secondary organic aerosol (SOA),  $0.054 \mu\text{m}$  for external BC and  $0.0695 \mu\text{m}$  for sulfate) and the width (1.8 for internally mixed BC with POM, 1.8 for SOA, 1.53 for external BC and 2.03 for sulfate). The sizes and widths are referred from Hess et al. (1998), Moteki et al. (2007) and Goto et al. (2008).”

[Additional references]

Hess, M., Koepke, P., and Schult, I.: Optical properties of aerosols and clouds: The software package OPAC, Bull. Am. Meteorol. Soc., 79, 831–844, doi:10.1175/1520-0477(1998)079<0831:OPOAAC>2.0.CO;2, 1998.

Moteki, N., Kondo, Y., Miyazaki, Y., Takegawa, N., Komazaki, Y., Kurata, G., Shirai, T., Blake, D. R., Miyakawa, T., and Koike, M.: Evolution of mixing state of black carbon particles: Aircraft measurements over the western Pacific in March 2004, Geophys. Res. Lett., 34, L11803, doi:10.1029/2006GL028943, 2007.

Goto, D., Takemura, T., and Nakajima, T.: Importance of global aerosol modeling including secondary organic aerosol formed from monoterpene, J. Geophys. Res., 113, D07205, doi:10.1029/2007JD009019, 2008.

[C1-11] p.8, line 10: what is meant by “flux of the ARI”?

[A1-11] According to your suggestion in C1-26, the terminology is also redefined. It is modified as follows: “RFari, the radiative forcing of the ARI”.

[C1-12] p.9, lines 6–20: given that a pre-industrial reference is mentioned elsewhere for the radiative-forcing calculations, please state what emissions are used for the pre-industrial case as well as for present-day/2010.

[A1-12] In the preindustrial case, the emission fluxes from all anthropogenic sources as well as biomass burning are set at zero, whereas the others are identical to those used in present day. This sentence was inserted into the end of section 2.3 as follows: “In the preindustrial era to estimate both ERF<sub>air</sub> and ERF<sub>aci</sub>, the emission fluxes from anthropogenic sources and biomass burning for BC, POM and SO<sub>2</sub> are set to zero, but those from other sources, i.e., all natural sources, are identical to those used in the present era.”

[C1-13] p.9, line 8: are biomass-burning emissions used for specific years in the simulation, or is this 2005–2014 period used to construct a climatology instead? If the latter, please consider the impact on the results (especially comparison to specific observations) of not capturing the real-year interannual variability in fire emissions.

[A1-13] We averaged the biomass-burning emission using 10 years (2005-2014 period) to construct a climatological field. Your concern is important and needs to be investigated, so we checked the interannual variability in emissions from biomass burning in GFED v4.1 and plotted some key figures as a supplementary figure (Figures S1 and S2). Using these figures, we would like to explain the possible impact of the climatological emissions from biomass burning. In the original manuscript, the model validation in specific years (less than 2 years) were performed;

- (1) Surface BC, OC and sulfate mass concentrations by CAWNET in China for 2006-2007 (Fig 8 in the revised manuscript or Fig 11 in the original figure): In China, since aerosols emitted/formed from anthropogenic sources are much larger than those from the biomass burning (BB) in annual averages, the impacts of the BB climatological fields on results should be small.
- (2) Surface sulfate mass concentrations at Barrow for 2008-2009 averages (Fig15f in the original figure): Figure S1(b) in supplement shows interannual variabilities of BC, POM and SO<sub>2</sub> in the Arctic (60°N-90°N). The 2008-2009 values for SO<sub>2</sub>, normalized by the 2005-2014 average, showed a range of 0.5-1. This shows that the simulated sulfate can be overestimated by using the climatological values of the biomass burning. However, the simulated sulfate in this study at this site tends to be underestimated. Therefore, the use of climatological emissions of biomass burning does not affect the gap between the simulation and the observation.
- (3) Vertical BC mass concentrations over the Pacific for 2009 (Fig 14 a-e in the revised manuscript and Fig 17a-e in the original manuscript): Supplemental Figure S1(a) shows the interannual variabilities of BC, POM and SO<sub>2</sub> for the global average. The 2009 amount of BC normalized to the average of 2005-2014 is 0.83, which is small compared to the differences in BC between the simulation and observation, especially at relatively low altitudes. However, in the Pacific Ocean, the effects of the biomass burning may be seen at relatively high altitudes. Some of the simulated BC concentrations at high altitudes are overestimated. Therefore, the use of climatological values for biomass burning may contribute to the gap between simulation and observation. This point was added to the revised manuscript in section 4.3.
- (4) Vertical BC mass concentrations over East Asia for March-April 2012 (Fig 14f in the revised manuscript and Fig 17f in the original manuscript): Supplemental Figure S1(c) shows the interannual variabilities of the March-April mean BC in the domain of 90°E-150°E, 20°N-40°N. The 2012 amount of BC normalized to the average of 2005-2014 is 0.72, which can cause the overestimation of the simulation. However, the contribution of the biomass burning in this region is not so great. Furthermore, since the range of the observation results is up to twice, the simulated results in the current manuscript as well as the simulated results using the emission from biomass burning for a specific year are considered to be within the observation range (Fig17f).
- (5) Vertical BC mass concentrations over the Arctic for March-April 2008 (Fig 14g in the revised manuscript and Fig 17g in the original manuscript): Supplemental Figure S1(c) also shows the interannual variabilities of the March-April mean BC in the domain of 60°E-90°E over the Arctic. The 2012 amount of BC normalized to the average of 2005-2014 is 3.67, which absolutely causes the overestimation of the simulation. This possibility was also mentioned in the original manuscript.
- (6) Vertical BC mass concentrations over the Arctic for July-August 2008 (Fig 14h in the revised manuscript and Fig 17h in the original manuscript): Figure S1(c) in the supplement also shows the interannual variabilities of for July-August mean BC in the domain of 60°E-90°E over the Arctic. The

2012 amount of BC normalized to the average of 2005-2014 is 0.42, which can cause the overestimation of the simulation. However, the simulated BC concentrations are largely underestimated compared to the observation. Therefore, the gap between the simulation and the observation is not attributed from the use of climatological emission of the biomass burning.

- (7) AOT and other parameters in 2012-2014 years: Supplemental Figure S2 illustrates global distribution of the differences in BC emission fluxes from biomass burning by GFEDv4 between the 2012-2014 and the 2005-2014 averages in Annual, January and July averages. The large differences are found in Siberia and Canada, where biomass burning often occurs in the summer season. In the Arctic average (60°E-90°E) shown in Figure S1(b), the 2012-2014 amount of AOT normalized to the average of 2005-2014 is approximately 1.5. This can influence the AOT validation using MODIS in these areas (Fig 5). Therefore, this point should be stated in section 3.2 in the revised manuscript as follows: “Over Canada and Siberia where biomass burning often occurs in summer, the NICAM-simulated AOT tends to be largely underestimated compared to the MODIS retrievals, partly due to use of climatological emission inventories for the biomass burning as pointed out in section 2.3 and Figure S2.”

In section 2.3 in the revised manuscript, we modified several sentences as follows: “The emission amounts of total BC were 5.6 Tg yr<sup>-1</sup> from anthropogenic sources in 2010 according to the Hemispheric Transport of Air Pollution (HTAP)-v2.2 emission inventory (Janssen-Maenhout et al., 2015) and an climatological average of 1.8 Tg yr<sup>-1</sup> from biomass burning over 2005-2014 from the Global Fire Emission Database version 4 (GFEDv4; van der Werf et al., 2017). The interannual variabilities of the emission from the biomass burning are shown in the supplemental figures (Figures S1 and S2) to show impacts of the climatological averages on the results in a specific year, indicating that the impacts can be mostly ignored with only a few exceptions: AOT over Canada and Siberia in 2012-2014 average (mainly section 3.2) and BC mass concentrations over the Pacific and over the Arctic in March-April 2008 (section 4.3).”

[C1-14] p.9, lines 11–13: what does a conversion from “POM” to “particulate organic aerosols” mean? Why is such a factor necessary, and different for anthropogenic vs biomass-burning? Or is that actually supposed to be referring to conversion between organic *carbon* (OC) and POM?

[A1-14] Sorry for confusing you. It should be expressed as “a conversion from organic carbon (OC) to POM”, so it was modified in the revised manuscript as follows: “Organic carbon (OC) is composed of both primary and secondary components; the emission amounts of primary OC were 20.3 Tg yr<sup>-1</sup> for anthropogenic sources (HTAP-v2.2) and 39.7 Tg yr<sup>-1</sup> from biomass burning (GFEDv4). These OC values are converted by multiplying the corresponding values for particulate organic matter (POM) by 1.6 for anthropogenic sources and 2.6 for biomass burning sources, whose values are used in several global aerosol models (Tsigaridis et al., 2014).”

[C1-15] p.10, line 4: is it correct that only Terra is used for MODIS AOD, and not Aqua? If so, why? Both are mentioned below for the CERES\_EBAF data. Also, are Dark Target or Deep Blue products used, or both?

[A1-15] Thanks for your comment. According to your suggestion, we used both Terra and Aqua AOTs retrieved from the combination of both Dark Target (DT) and Deep Blue (DB), i.e., merged DT/DB method, in the revised manuscript. We modified Figure 5 (global distributions of AOT) in the revised manuscript. We found the global annual averages of the HRM-simulated AOT (0.175) and the LRM-simulated AOT (0.170) are within the differences between the MODIS/Aqua-retrieved AOT (0.163) and MODIS/Terra-retrieved AOT (0.184). However, as mentioned in the original manuscript, the regional distributions of both the HRM-simulated and LRM-simulated AOTs are different from those of the MODIS-retrieved AOTs. In the revised manuscript, we modified the first paragraph in section 3.2. Please see the revised manuscript. The CERES\_EBAF data are estimated from the radiative fluxes using CERES sensors onboard both Terra and Aqua satellites to consider the diurnal variations of clouds. This point, the above points for MODIS AOT, and other points related to [A2-9] are modified in the revised manuscript as follows: “Table 1 summarizes the measurements used in this study for the model evaluation. Satellite observations greatly assist in better understanding the global model performance of optical properties. The Moderate Resolution Imaging Spectroradiometer (MODIS), a sensor on board the polar-orbiting satellites Terra and Aqua, observes both aerosols and clouds. The cloud products, i.e., COT only for warm-topped clouds and cloud

fraction (CF), and the aerosol products, i.e., AOT, in collection 6 are retrieved with a grid of  $1^\circ \times 1^\circ$  by a NASA algorithm (Platnick et al., 2015). For clouds, the MODIS-retrieved COT has some positive biases especially in high latitudes, due to high solar zenith angle (Grosvenor and Wood, 2014; Lebsock and Su, 2014). For the AOT, the combination method of Dark Target (DT) and Deep Blue (DB) is used and can retrieve AOTs even over the desert areas (Levy et al., 2013), but it does not retrieve AOTs over high-albedo areas covered by snow and some specific areas, which include caatinga/cerrado surfaces over eastern Brazil in June-July-August and over Australia in all seasons (Sayer et al., 2014).” “The top-of-atmosphere (TOA) radiation fluxes, i.e., outgoing shortwave radiation (OSR), outgoing longwave radiation (OLR) and shortwave and longwave cloud radiative forcing (CRF), prepared by the CERES\_EBAF\_Ed2.8 level-3 product are obtained from a sensor of the Clouds and the Earth's Radiant Energy System (CERES) experiment onboard Terra and Aqua using  $1^\circ \times 1^\circ$  grids by considering the diurnal variations of clouds (Loeb et al., 2009).”

Grosvenor, D., and Wood, R.: The effect of solar zenith angle on MODIS cloud optical and microphysical retrievals within marine liquid water clouds, *Atmos. Chem. Phys.*, 14, 7291-7321. <https://dx.doi.org/10.5194/acp-14-7291-2014>, 2014.

Lebsock, M., and Su, J.: Application of active spaceborne remote sensing for understanding biases between passive cloud water path retrievals, *J. Geophys. Res.: Atmospheres* 119, 14, 8962-8979. <https://dx.doi.org/10.1002/2014jd021568>, 2014.

Levy, R. C., Mattoo, S., Munchak, L. A., Remer, L. A., Sayer, A. M., Patadia, F., and Hsu, N. C.: The Collection 6 MODIS aerosol products over land and ocean, *Atmos. Meas. Tech.*, 6, 2989-3034, doi:10.5194/amt-6-2989-2013.

Sayer, A. M., Munchak, L. A., Hsu, N. C., Levy, R. C., Bettenhausen, C., and Jeong, M.-J.: MODIS Collection 6 aerosol products: Comparison between Aqua's e-Deep Blue, Dark Target, and “merged” data sets, and usage recommendations, *J. Geophys. Res. Atmos.*, 119, 24, 13965-13989, doi:10.1002/2014JD022453, 2014.

[C1-16] p.12, lines 11–23: it's quite hard to identify the differences in these plots. Please include some kind of difference or statistical comparison plot (as is done in Fig. 6 for the aerosol fields).

[A1-16] Thanks for your comment. We plotted statistical comparisons in the supplement Figure S4 like Figure 6 in the original manuscript. In addition, we added global land/ocean averages to Figure 2 (we also fixed the global average values, as mentioned in the A1-1). Using these new figures, we largely modified the text about the wind comparison as follows: “Figure 2 illustrates the annual, January and July averages of the wind directions and speeds at a height of 10 m using the HRM-simulated, LRM-simulated and NCEP-reanalyzed winds. The global distribution of the statistical metrics, i.e., Pearson correlation coefficient (PCC), normalized mean bias (NMB) and root-mean-square error (RMSE), for the annually averaged wind speeds between the NICAM simulations and NCEP-reanalysis data are illustrated in the supplement (Figure S4). The global annual averages of both the HRM-simulated and LRM-simulated wind speeds (approximately  $4.2 \text{ m s}^{-1}$ ;  $4.169 \text{ m s}^{-1}$  for HRM and  $4.242 \text{ m s}^{-1}$  for LRM) are slightly lower than those of the NCEP-reanalyzed wind speeds ( $4.487 \text{ m s}^{-1}$ ). The differences in the wind speed between the models and NCEP over land are smaller than those over ocean. The correlations between the NICAM (both the HRM and the LRM) and NCEP are moderate with a PCC of approximately 0.58 (0.577-0.580) for the global averages, whereas the differences in the PCC between land (0.582 for HRM and 0.590 for LRM) and ocean (0.576 for HRM and 0.577 for LRM) are small. The global annual average RMSEs between the NICAM simulations and NCEP are calculated to be approximately  $1.45 \text{ m s}^{-1}$  ( $1.446 \text{ m s}^{-1}$  for HRM and  $1.461 \text{ m s}^{-1}$  for LRM), approximately one-third of the global averages. The RMSEs are relatively high over the Southern Ocean ( $45^\circ\text{S}$ - $70^\circ\text{S}$ ), with values of at most  $5.0 \text{ m s}^{-1}$ . The NMBs are calculated to be  $-7.6\%$  (HRM) and  $-5.8\%$  (LRM) for the global averages. The RMSE and NMB over land are smaller than those over ocean. In Figures 2(a), 2(b) and 2(c), the spatial patterns of the HRM-simulated and LRM-simulated winds are generally in agreement with those obtained from the NCEP-reanalysis data, although there are some differences between the models and the NCEP reanalysis. The difference is predominantly caused by an underestimation over the Southern Ocean (within  $45^\circ\text{S}$ - $70^\circ\text{S}$ ) with lower correlation (PCC), higher

uncertainty (RMSE) and more negative bias (NMB) than other areas (Figure S4). More negative NMB values over land are also found in both HRM and LRM (Figure S4(g) and S4(h)), even though the NCEP wind speeds are generally less than  $3 \text{ m s}^{-1}$  over land. In January and July, the global averages of both the HRM-simulated and the LRM-simulated wind speeds are also lower than those of the NCEP-reanalyzed wind speeds by at most 10%. In January, the differences in the global averages of wind speed between the models and the NCEP reanalysis over land are larger than those over ocean, whereas in July those over land are smaller than those over ocean. In regions where sea salt is dominant over the Southern Ocean in both January and July and dust is the dominant over the Sahara in July, the differences in wind speeds between the HRM and LRM are relatively large. Although we expected the HRM-simulated wind speeds to be higher than the LRM-simulated wind speeds, our results do not confirm this behavior because the wind speed can be influenced by several complex mechanisms, such as clouds and radiation.”

[C1-17] p.15, line 16: please quote the actual MODIS AOT value here.

[A1-17] We added it to the revised manuscript. As we mentioned in A1-1, the values of the global average for AOT are also corrected. Also, as we mentioned in A1-15, we used both MODIS/Terra and MODIS/Aqua in Figure 5. As a result, the explanation for Figure 5 was changed. Please see the first paragraph in section 3.2 in the revised manuscript.

[C1-18] p.16, line 23: are't these are ground-based, not satellite, observations?

[A1-18] Thanks for your comment. Right. We corrected it.

[C1-19] p.16, line 25–p.17, line 3: please consider the behaviour of the “coarsened” HRM data here, which should indicate whether the differences relate to the model resolution itself, or the fact that the observation sites are simply less representative of the coarser grid boxes.

[A1-19] This suggestion is very important. To clarify it, we evaluated the HRM results with  $0.5^\circ$  grid average by averaging 16 pixels of  $0.125^\circ$  grids (in the supplement of Table S5). As a result, we found that all statistical metrics in all cases were worse, for example, lower PCC (-0.014), higher RMSE (0.003) and larger NMB (-0.8%) in annual averages than those in the HRM results with the original grid ( $0.125^\circ$ ), but still higher than those in the LRM results. Therefore, in the revised manuscript we newly pointed out that “When the HRM-simulated AOTs with a grid converted to  $0.5^\circ \times 0.5^\circ$  by averaging 16 pixels of  $0.125^\circ$  grids are evaluated using the in-situ measurements, the statistical metrics are worse than those in the original grids, i.e., lower PCC (-0.014), higher RMSE (0.003) and larger NMB (-0.8%) with regard to the annual averages (Table S5), but still higher than those in the LRM results. This finding suggests that the  $0.5^\circ$  grid is not fine enough to correspond to the representative value at the observation sites and the differences in AOTs between the HRM and LRM are not due to the grid conversion but the model resolution itself.” In addition, we also investigated the coarseness of the grid for the surface mass concentrations of sulfate, BC, POM, dust and sea salt. The same was found for sulfate, BC and POM only. This point was also added to the revised manuscript as follows: “As mentioned in the AOT comparison using in-situ measurements, although a  $0.5^\circ$  grid may not be fine enough to represent the observation sites, the difference between the HRM and LRM is not due to the analysis grid size but the model resolution itself (Table S6).”

[C1-20] p.22, line 7: why does underestimation of the emission inventory indicate the importance of using finer horizontal resolution? One does not obviously follow from the other.

[A1-20] In general, the emission inventory averaged on the coarse grid is smoothed from the original inventory, so strong emission fluxes from local points are not reflected on the coarse grid. Most of the smoothed sources are close to dense urban areas, as mentioned in revised summary and [A1-32]. Therefore, the underestimation of the BC emission inventory is partly caused by the smoothing effect, which requires a higher resolution simulation to use the emission inventory in the original high resolution grid. However,

this confused you, so we removed the original part and added it (related to A1-32) in the revised manuscript: “or the 14-km grid spacing is not sufficient to resolve such high concentrations in highly dense urban areas”.

[C1-21] p.22, line 22: please define what you mean by “secondary” and “tertiary” products.

[A1-21] Surely it is not clear. Thanks. We added the following sentences to the relevant paragraph: “This finding suggests that the primary product, i.e., BC, is the most influenced by the grid size, but the secondary product, i.e., sulfate formed from oxidation of SO<sub>2</sub> (this is a primary product) and removal through precipitation, and the complex product, i.e., AOT comprising various aerosols including primary and secondary particles and being highly dependent on RH, are less influenced by the grid size. Therefore, the impacts of higher horizontal grid spacings on model performance for secondary products, such as sulfate, and complex products, such as AOT, are weaker than those for primary products, such as BC.”

[C1-22] p.23, line 17: “incredibly” is too strong a word here.

[A1-22] Thanks for your comment. We changed it to “very”.

[C1-23] p.23, line 24–p.24, line 1: the description of LRM-macro is rather confusing here. Please introduce both LRM-macro and VLRM-macro properly in the main model- description section instead of suddenly throwing them in during the discussion section.

[A1-23] Thanks for your suggestion. We removed this and inserted to the end of section 2.1 as follows: “In the sensitivity experiments for a comparison of aerosol mass concentrations over the Arctic in section 4.2, a cloud macrophysics module containing both a large-scale cloud condensation (Le Treut and Li, 1991) instead of the NSW6 cloud microphysics scheme and a cumulus parameterization (Chikira and Sugiyama, 2010) are adopted in the NICAM with 56-km and 220-km grid spacings. Hereafter, the sensitivity experiments are called low-resolution model (56-km) with the macrophysics module (LRM-macro) and very low-resolution model (220-km) with the macrophysics module (VLRM-macro). The VLRM-macro results have been evaluated against measurements in previous studies (Dai et al., 2014; Goto et al., 2015b; Dai et al., 2018).”

[C1-24] p.26, line 1: CALIPO → CALIOP.

[A1-24] Thanks for your correction.

[C1-25] p.26, lines 3–23: Figure 17 suggests that the LRM consistently matches the SP2- observed profile shape better than the HRM, especially at higher altitudes (ARCTAS-B being the exception in absolute terms due to a bias although the *shape* is still a better match with the LRM). However, the discussion seems to gloss over this result which goes against the general theme of “HRM performs better”. This needs to be identified in the text, and consideration given to how it fits with the rest of the results and conclusions.

[A1-25] Thanks. According to your comments, we added the relevant sentences in section 4.3 as follows: “Above approximately 700 hPa, however, the differences between the HRM and LRM become large, which is consistent with the results of the comparison with CALIOP in Figure 13. Moreover, because the LRM-simulated BC concentrations are lower than those in the HRM, those in the LRM are closer to the observations than those in the HRM. As already mentioned in Table 2 in section 3.2, the differences in the BC concentrations between the HRM and LRM are caused by differences in the BC lifetime, especially for WIBC.” The discussion of the different shapes, i.e., the overestimation of BC above 700 hPa, is supported by the discussion of the budgets shown in Table 2. Since the discussion using Table 2 was performed in section 3.2, we here added the possibility that BC lifetime is overestimated as one of the reasons to section 4.3 as follows: “The overestimation of the BC lifetime may be attributed to the underestimation of the wet deposition of WIBC in the HRM, overestimation of the convective mass flux above 500 hPa, which may



be improved by increasing the number of vertical layers in the model (Allen and Landuyt, 2014), [possible overestimation of the climatological BC emission from biomass burning \(Figure S1\)](#), and a lack of secondary aerosol activation by convective clouds and associated removal by precipitation (Yu et al., 2019).”

[C1-26] p.28, line 20–p.30, line 16: the terminology (ARF, IARF etc.) used throughout this section is non-standard and confusing. Please consider using terminology like RFari, ERFaci etc. consistent with IPCC usage for clarity. Most of the values quoted in this section also need uncertainty estimates or some other method to enable an assessment of whether their differences are significant or not, otherwise they are not that meaningful.

[A1-26] Sorry for confusing you. We modified it to use standard terminology such as RFari and RFaci in sections (i.e., section 2.2, 4.4 and 5) in the revised manuscript (not shown in detail here, so please see the revised manuscript).

[C1-27] p.29, lines 13–14: the second half of the sentence, “probably because the light- absorption... ” doesn’t make much sense. Please rephrase more clearly.

[A1-27] We modified it as follows: “which is probably because the light-absorption of carbonaceous aerosols is underestimated due to the underestimation of cloud scattering.” We believe this is simpler and clearer.

[C1-28] p.30, lines 22–23: this appear to quote variability of “meteorological fields” in  $Tg\ yr^{-1}$ , which doesn’t make sense for any usual meteorological quantity. Please check what is actually meant here.

[C1-29] p.31, lines 1–7 etc.: please explain how the “difference caused by meteorological variabilities” is being quantified here as this is not at all clear. I think this is based on some measure of the variation over the three years of simulation, but please clarify explicitly *what* measure of this is being used, and also its associated uncertainty or confidence range given the small number of years.

[A1-28 and A1-29] Sorry for confusing you. We intended to express the “meteorological difference” as the “interannual variability”. In the revised manuscript, we used the word “interannual variability” and largely modified them in section 4.5 including the title “4.5 [Interannual variability](#)” and Figure 16 (Fig 19 in the original manuscript). We believe the revised Figure 16 helps readers understand what we want to show in this section and understand if the difference between HRM and LRM is greater or less than the maximum and minimum difference of each 1-year average over the 3 years. Details are not shown here, so please see the revised manuscript.

[C1-30] p.32, line 3: 3 years is a long simulation at such resolution, however it’s still very short for any study involving interannual climate variability, as discussed above. Although this is one of the novel aspects of the work, describing it as “very pioneering” in this context is unjustified.

[A1-30] Thanks for your comment. We removed this.

[C1-31] p.33, line 6: does “carbon” here refer to BC, OC, or both together?

[A1-31] This includes all carbonaceous aerosols including WIBC, WSBC and POM. So, we changed it into “all carbonaceous aerosols”.

[C1-32] p.33, lines 18–19: why should the lack of agreement with observations over China be attributed to an urban-density issue at this resolution that doesn’t apply elsewhere, rather than to a possible error in the emissions inventory, for example?

[A1-32] This comment is related to [A1-20]. We think there are two main possible reasons: (1) emission and (2) model resolution. Therefore, we added the possibility that the emission inventory is underestimated. As a result, this part was modified as follows: “This suggests that the emission inventory in China is underestimated or the 14-km grid spacing is not sufficient to resolve such high concentrations in highly dense urban areas.”

[C1-33] p.34, lines 2–6: this terse list of “variabilities at relevant sites” isn’t really appropriate for the presentation of conclusions. Please clarify what the actual conclusion is here instead.

[A1-33] Sorry, this expression is very unclear. As revised in the abstract, we modified it as follows: “At the polluted sites during polluted months, the differences in the simulated aerosol concentrations between the HRM and LRM are estimated with NMBs of -19% for surface BC, -5% for surface sulfate and -3% for AOT.”

[C1-34] p.34, lines 13–24: this needs to take account of the apparent better performance of the LRM with respect to SP2 profiles mentioned above.

[A1-34] As we modified the relevant parts of your comment in [C1-25], we added the following sentence to the end of this paragraph in the revised manuscript: “This is also suggested by the validation of the vertical BC profile, which shows better performance of the LRM, whose lifetime of BC (4.97 days) is smaller than that in the HRM (6.37 days) and closer to the reference value (less than 5 days) from previous studies (Lund et al., 2018).”

[C1-35] p.35, lines 6–7: “negatively large[r]” is rather confusing. Does this mean “strongly/more negative”?

[A1-35] Thanks. We corrected “more negative” here.

[C1-36] p.35, lines 15–18: again, this conclusion is rather unclear. What distinguishes the “relevant” fields from the “others”? Please rephrase and clarify.

[A1-36] Thanks for your comment. After we revised Figure 16 in the revised manuscript (Figure 19 of the original manuscript) and section 4.5 in [A1-28 and A-29], we modified this part as follows: “The interannual variability is mainly reflect in the winds over land and RH, which cause relatively larger variabilities in dust (emission flux, column burden and AOT) and sea salt (mainly AOT). As a result, the total AOT and IRFari under clear-sky conditions and for longwave are more influenced by the interannual variabilities than those by the horizontal resolution. This suggests that the clouds are also significantly modulated by the interannual variabilities rather than the horizontal resolution. However, the results related to sulfate, POM and BC are strongly influenced by the horizontal resolution compared to the interannual variability, and discussions of the impacts of different horizontal grid spacings on these parameters can be facilitated using only a 1-year integration.”

[C1-37] p.35, lines 23–25: it’s not clear what this means. What tuning exactly has been carried out here using the LRM for the HRM? Does this tuning have a bearing on the results presented in the manuscript?

[A1-37] In our aerosol module, we used several tuning parameters but did not explicitly mention them in the original manuscript. Therefore, we added several comments to the revised manuscript related to the tuning parameters used in this study. First, main tuning parameters in our aerosol module are the interstitial fraction of aerosols to largely determine the amount of the wet deposition fluxes. This point was newly added to section 2.2 in the revised manuscript as follows: “Although aerosols coexist in both interstitial and inside clouds in the wet deposition, the interstitial fractions of aerosols are tuning parameters in the aerosol

module and set at 0.5 for dust, 0.2 for sea salt, 0.5 for all POM, 0.9 for external BC and 0.5 for sulfate in this study.” All parameters used in the aerosol module in HRM are also used in those in LRM, so we added the following statement to section 2.2: “All parameters used in the HRM aerosol module also apply to those used in the LRM aerosol module.” In addition, the dust emission function in our aerosol module uses some tuning parameters (Takemura et al., 2000), so that we added this point to section 2.3 in the revised manuscript: “The emission flux of dust depends on the cube of the wind speed and empirical coefficients, which are determined by the soil moisture, the land use, snow cover and tuning coefficients depending on the region (Takemura et al., 2000). The tuning parameters used in the HRM also apply to those used in the LRM.” Finally, we modified the relevant point in summary as follows: “In this case, various tuning parameters associated with the aerosol distributions using the LRM (56-km grid) can be directly applied to the HRM (14-km grid) simulations, as we did in this study.”

# Global aerosol simulations using NICAM.16 on a 14-km grid spacing for a climate study: Improved and remaining issues relative to a lower-resolution model

Daisuke Goto<sup>1</sup>, Yousuke Sato<sup>2,3</sup>, Hisashi Yashiro<sup>1,3</sup>, Kentaroh Suzuki<sup>4</sup>, Eiji Oikawa<sup>5</sup>, Rei Kudo<sup>6</sup>,

5 Takashi M. Nagao<sup>4</sup>, Teruyuki Nakajima<sup>7,1</sup>

<sup>1</sup>National Institute for Environmental Studies, Tsukuba, Japan

<sup>2</sup>Faculty of Science, ~~Department of Earth and Planetary Sciences~~, Hokkaido University, Sapporo, Japan

<sup>3</sup>RIKEN Center for Computational Research, Kobe, Japan

<sup>4</sup>Atmosphere and Ocean Research Institute, University of Tokyo, Kashiwa, Japan

10 <sup>5</sup>Research Institute for Applied Mechanics, Kyushu University, Kasuga, Japan

<sup>6</sup>Meteorological Research Institute, Tsukuba, Japan

~~<sup>7</sup>Earth Observation Research Center, Japan Aerospace Exploration Agency, Tsukuba, Japan~~

*Correspondence to:* Daisuke Goto ([goto.daisuke@nies.go.jp](mailto:goto.daisuke@nies.go.jp))

**Abstract.** High-performance computing resources allow us to conduct numerical simulations with a horizontal grid spacing that is sufficiently high to resolve cloud systems on a global scale, and high-resolution models (HRMs) generally provide better simulation performances than low-resolution models (LRMs). In this study, we execute a next-generation model that is capable of simulating global aerosols ~~on using version 16 of the~~ nonhydrostatic icosahedral atmospheric model ~~version 16~~ (NICAM.16). The simulated aerosol distributions are obtained for 3 years with an HRM ~~in using~~ a global 14-km grid spacing, an unprecedentedly high horizontal resolution and long integration period. For comparison, a NICAM with a 56-km grid spacing is also run as an LRM, although this horizontal resolution is still high among current global aerosol climate models. The comparison elucidated that the differences in the various variables of meteorological fields, including the wind speed, precipitation, clouds, radiation fluxes and total aerosols, are generally within 10% of their annual averages, but most of the variables related to aerosols simulated by the HRM are slightly closer to the observations than are those simulated by the LRM. Upon investigating the aerosol components, the differences in the water-insoluble black carbon ~~(WIBC)~~ and sulfate concentrations between the HRM and LRM are large (up to 32%), even in the annual averages. This finding is attributed to the differences in the ~~column burden of the~~ aerosol wet deposition flux, which is determined by ~~a the~~ conversion rate of ~~precipitation cloud to cloud-precipitation~~, and the difference between the HRM and LRM is approximately 20%. Additionally, the differences in the simulated aerosol concentrations at polluted sites during polluted months between the HRM and LRM are estimated with medians normalized mean biases of ~~-23.19%~~ ~~(-63% to -2.5%)~~ for black carbon (BC), ~~-45%~~ ~~(-91% to +18%)~~ for sulfate and ~~-13%~~ ~~(-49% to +223%)~~ for the aerosol optical thickness (AOT). These findings indicate that the impacts of higher horizontal grid spacings on model performance for secondary products such as sulfate, and complex products such as the AOT, are weaker than those for primary products, such as BC ~~the differences in the secondary and tertiary products, such as the AOT, between the different horizontal grid spacings are not explained simply by the grid size~~. On a global scale, the subgrid variabilities in the simulated AOT and cloud optical thickness (COT) in the  $1^\circ \times 1^\circ$  domain using 6-hourly data are estimated to be 28.5% and 80.0%, respectively, in the HRM, whereas the corresponding differences are 16.6% and 22.9% in the LRM. Over the Arctic, both the HRM and the LRM generally reproduce the observed aerosols, but the largest difference in the surface BC mass concentrations between the HRM and LRM reaches 30% in spring (the HRM-simulated results are closer to the observations). The vertical distributions of the HRM- and LRM-simulated aerosols are generally close to the

measurements, but the differences between the HRM and LRM results are large above a height of approximately 3 km, mainly due to differences in the wet deposition of ~~the~~ aerosols. The global annual averages of the effective direct and indirect aerosol radiative forcings due to aerosol-radiation and aerosol-cloud interactions (ERF<sub>ari</sub> and ERF<sub>aci</sub>) attributed to anthropogenic aerosols in the HRM are estimated to be  $-0.293 \pm 0.001$  ~~0.29~~  $\text{W m}^{-2}$  and  $-0.919 \pm 0.004$  ~~0.93~~  $\text{W m}^{-2}$ , respectively, whereas those in the LRM are  $-0.239 \pm 0.002$  ~~0.24~~  $\text{W m}^{-2}$  and  $-1.101 \pm 0.013$  ~~1.10~~  $\text{W m}^{-2}$ . The differences in the direct AERF<sub>ari</sub> between the HRM and LRM are primarily caused by those in the aerosol burden, whereas the differences in the indirect AERF<sub>aci</sub> are primarily caused by those in the cloud expression and performance, which are attributed to the grid spacing. The analysis of interannual variability revealed that the difference in reproducibility of both sulfate and carbonaceous aerosols at different horizontal resolution is greater than their interannual variability over 3 years, but those of dust and sea salt AOT and possibly clouds were the opposite. Because at least one-tenth-ten times ~~of~~ the computer resources are required for the HRM (14-km grid) ~~LRM (56-km grid)~~ compared to the LRM (56-km grid) ~~HRM (14-km grid)~~, these findings in this study help modelers decide whether the objectives can be achieved using such higher resolution or not we recommend that the various tuning parameters associated with the aerosol distributions using the LRM can be applicable to those using the HRM under the limitation of ~~the~~ available computational resources ~~or before the HRM integration~~.

## 15 1 Introduction

High-performance computing resources allow us to conduct numerical simulations with a horizontal grid spacing that is sufficiently fine to resolve cloud systems on a global scale. Suzuki et al. (2008) first performed a high-resolution global simulation while explicitly treating ~~the~~ aerosol-cloud interactions (ACIs) and reproduced the interactions obtained from satellite measurements. For the past 10 years, various high-resolution models (HRMs) have been developed to address the heretofore unresolved mechanisms related to cloud processes; one example of a related outcome is the buffered system hypothesis (e.g., Stevens and Feingold, 2009; Malavelle et al., 2017). When modeling atmospheric pollutants, such as aerosols and short-lived gases, HRMs are believed to provide a better simulation performance than low-resolution models (LRMs). For example, Qian et al. (2010) showed that simulations of the trace gases and aerosols in the vicinity of Mexico City in March with a 3-km horizontal resolution are far more advantageous than simulations with 15-km and 75-km horizontal resolutions; this indicates

that a high-resolution horizontal grid can resolve local emissions and terrain-induced flows along mountain ridges. Similarly, Ma et al. (2014) identified that the aerosols and clouds simulated over the Arctic in April at the finest resolution (10 km) are closer to the observations than those simulated at a coarser resolution (ranging from 20 km to 160 km). In addition, using a global model with a horizontal resolution varying from 3.5 km to 56 km, Sato et al. (2016) showed that fine-resolution grids can more realistically resolve low-pressure systems with vortexes at mid-latitudes, which result in the realistic transport of black carbon (BC) to the Arctic in November, than can coarse-resolution grids. On a global scale, Sekiya et al. (2018) employed a global chemical transport model with an integration period of 1 year and provided a more realistic distribution of short-lived gaseous NO<sub>2</sub>, especially in urban areas, with a horizontal resolution of approximately 60 km (0.56°×0.56°) than with horizontal resolutions of approximately 110 km and 300 km (1.1°×1.1° and 2.8°×2.8°). Furthermore, Schutgens et al. (2016) investigated the subgrid variability of simulated aerosols with a 10-km resolution in various domains and noted the importance of a fine grid sizes, and Goto et al. (2016) showed that 10-km grid simulations around Japan over an integration period of 3 years require a regional HRM to properly reproduce the concentrations of aerosols ~~since because~~ such high concentrations in urban areas create health concerns for many people (Ezzati et al., 2002). The studies mentioned above focused on atmospheric pollutants and discussed the advantages of HRMs at various scales and among different seasons; nevertheless, with only a few exceptions, ~~their the~~ models were not executed with horizontal grids finer than 50 km for adequately long periods on a global scale. For instance, Hu et al. (2018) successfully applied the Goddard Earth Observing System (GEOS)-Chem model with a 12.5-km horizontal grid to simulate aerosols and short-lived gases, and Sato et al. (2018) clarified the advantages of ~~an~~ HRM using a nonhydrostatic icosahedral atmospheric model (NICAM) with a 14-km horizontal grid to resolve ACIs. However, these two studies focused on study periods of just 1 year. The 1-year calculation cannot provide ~~the~~-yearly variability; thus, clarifying whether the differences in the simulated results between ~~the~~-HRMs and LRMs are caused by a difference in horizontal resolution or meteorological fluctuations among years is difficult. The NASA GEOS-5 aerosol forecasting system has been running at these high resolutions for several years (e.g., Gelaro et al., 2015), but to our knowledge, the published literature does not explain the difference in the simulated results between the HRM and LRM. As such, the merits of using HRMs with horizontal grid resolutions finer than 50 km to simulate aerosols in global and climatological fields remain ambiguous. Thus, it

is very important to clarify this issue and to provide scientific evidence for our future; to achieve this goal, global calculations of air pollutants must be performed with HRMs ~~in-using~~ horizontal grids finer than 10 km.

Therefore, in this study, we investigate how much relatively high-resolution grids can improve the simulation results of aerosols and their interactions with clouds and radiation fluxes for climatological fields. For this purpose, we executed a NICAM with aerosol components on a 14-km horizontal grid for 3 years. This 14-km horizontal grid boasts the finest resolution among all global chemistry models and is generally finer than most regional chemistry models (Galmarini et al., 2018). To effectively show the advantages in the simulated parameters related to aerosols in the HRM with a 14-km horizontal grid, we also executed an LRM with a 56-km horizontal grid, which is still finer than most global aerosol climate models (Myhre et al., 2013; Galmarini et al., 2018) but coarser than some of those used for operational global aerosol forecasting (Sessions et al., 2015).

Some issues are still under debate in global aerosol models. For example, how well are atmospheric pollutants over the Arctic reproduced (e.g., Shindell et al., 2008)? In addition, why do most global models overestimate BC (and possibly other species) in the middle and high troposphere over the remote ocean (e.g., Schwarz et al., 2013)? Finally, what are the aerosol radiative forcing (ARF) values estimated through aerosol-radiation interactions (ARIs) and ACIs using global cloud-system resolving models? Furthermore, it is also important to quantify the differences caused by the horizontal grid spacing or yearly variability of the meteorological fields.

In this paper, the models and observation datasets are described in section 2. Section 3 demonstrates the results of using the NICAM coupled to an aerosol module and compares the results with multiple measurements. The first part of section 3 illustrates the global distributions of meteorological fields such as winds, precipitation, clouds, and radiation, while the second part shows the results of evaluations with the HRM and LRM using multiple aerosol measurements. In section 4, the effects of different grid spacings on the aerosol fields, model evaluations over the Arctic, ARFs, uncertainties-interannual variabilities over 3 year integration caused by the meteorological fields and required computational resources are discussed. Section 5 provides the summary of this work and the implications for future research on HRMs in the context of powerful computational resources.



## 2 Model descriptions and experimental design

### 2.1 NICAM

Aerosol simulations were performed with a nonhydrostatic icosahedral atmospheric model (NICAM) with a uniform grid system (Tomita and Satoh, 2004; Satoh et al. 2008; 2014). The NICAM was executed with unprecedentedly high resolutions, namely, 0.87 km for 1 week (Miyamoto et al., 2012) and 14 km for 25 years under Atmospheric Model Intercomparison Project (AMIP)-like experiments (Kodama et al., 2015), although these studies did not consider aerosols. Subsequently, Suzuki et al. (2008) first conducted a global 7-km integration of aerosols for 1 week in July 2006 and validated the simulated ACIs by comparing them with satellite measurements. Sato et al. (2016) performed a global 3.5-km integration of aerosols for 2 weeks in November 2011 to focus on the transport and deposition of BC over the Arctic. Jing et al. (2017) and Sato et al. (2018) analyzed cloud microphysics parameters simulated by using a NICAM with aerosol components and a 14-km grid spacing for 1 year in 2012. Additionally, to analyze the transport of a simulated tracer in an HRM, Ishijima et al. (2018) calculated a radon tracer that has a long lifetime in the atmosphere using a NICAM with a 14-km horizontal resolution for 3 years. However, these studies did not elucidate the distributions of the aerosol components on a global scale for more than 1 year. Therefore, the present study extends these studies by simulating aerosol components for 3 years to discuss them climatologically.

The NICAM, which corresponds to a dynamic core, simulates the basic prognostic variables such as air temperature, wind, water vapor, cloud, precipitation and radiation fluxes by calculating different processes, such as advection and diffusion, and the corresponding physics. In this study, the NICAM developed in 2016 was used as NICAM.16. The options to use modules for these calculations in running the NICAM with a 14-km resolution are almost similar to those used in Kodama et al. (2015). The advection module is based on Miura (2007) and Niwa et al. (2011), and the diffusion module is the level-2 Mellor-Yamada-Nakanishi-Niino (MYNN) scheme (Mellor and Yamada, 1972; Nakanishi and Niino, 2004). The module for calculating the land surface flux is the Minimal Advanced Treatments of Surface Interaction and Runoff (MATSIRO) model with boundary conditions such as the land cover type, soil type, leaf area index and ground albedo (Takata et al., 2003). The Model Simulation Radiation Transfer code (MSTRN-X), which is based on the k-distribution scheme, is adopted for the

radiation model to calculate the radiative fluxes by considering the scattering, absorption and emissivity of aerosols and clouds and their absorption by gases (Sekiguchi and Nakajima, 2008). The MSTRN-X also calculates the global, direct and diffuse solar fluxes. The cloud microphysics module is the NICAM Single-Moment Water 6 (NSW6) scheme (Tomita, 2008), which prognoses the single-moment bulk amounts of 6 categorized hydrometeors, i.e., water vapor, cloud water, rain, cloud

5 ice, hail and graupel. Cloud water and rain are fully interactive affected by with cloud condensation nuclei (CCN), which are online calculated by the parameterization of Abdul-Razzak and Ghan (2000) as an indirect aerosol effect or aerosol-cloud interaction (IARF). The parameterization of aerosol activation considers the updraft velocity, aerosol sizes and aerosol chemical compositions. Even in an HRM, the updraft velocity tends to be small; therefore, the updraft velocity is also parameterized by the formulation proposed by Lohmann et al. (1999) using turbulent kinetic energy, and the minimum value

10 of the updraft velocity is set to  $0.1 \text{ m s}^{-1}$  (Ghan et al., 1997). The minimum number of CCN is set at  $25 \text{ cm}^{-3}$ , as defined in the previous studies (Jing et al., 2017; Sato et al., 2018). Under high-resolution horizontal grid simulations, a NICAM does not generally adopt a cumulus parameterization or define the cloud fraction (e.g., Satoh et al., 2010; Goto et al., 2015a; Goto et al., 2019). This study defines a warm-cloud frequency, which is set to 1 when (1) the sum of all hydrometers except water vapor exceeds  $10^{-4} \text{ kg m}^{-3}$ ; (2) the cloud liquid water content (LWC) exceeds  $10^{-3} \text{ kg m}^{-3}$  and (23) the cloud optical

15 thickness (COT) exceeds 0.2 or (3) the cloud ice water content exceeds  $10^{-3} \text{ kg m}^{-3}$ , otherwise it is set to zero. Under the above conditions as well as the condition where the sum of all hydrometers except water vapor exceeds  $10^{-4} \text{ kg m}^{-3}$ , the warm cloud frequency is set to 1 (Sato et al., 2018). The autoconversion rate from cloud to raindrops is parameterized by Berry (1967). The simulated relationship between cloud and precipitation with a 14-km grid spacing has already been thoroughly evaluated in previous studies (Jing et al., 2017; Sato et al., 2018). In the sensitivity experiments for a comparison

20 of aerosol mass concentrations over the Arctic in section 4.2, a cloud macrophysics module containing both a large-scale cloud condensation (Le Treut and Li, 1991) instead of the NSW6 cloud microphysics scheme and a cumulus parameterization (Chikira and Sugiyama, 2010) are adopted in the NICAM with 56-km and 220-km grid spacings. Hereafter, the sensitivity experiments are called low-resolution model (56-km) with the macrophysics module (LRM-macro) and very low-resolution model (220-km) with the macrophysics module (VLRM-macro). The VLRM-macro results have been

25 evaluated against measurements in previous studies (Dai et al., 2014; Goto et al., 2015b; Dai et al., 2018).

## 2.2 Aerosol module

The aerosol module, based on the Spectral Radiation-Transport Model for Aerosol Species (SPRINTARS) (Takemura et al., 2005), was implemented in NICAM by Suzuki et al. (2008), and the results ~~were have been~~ sufficiently validated through previous studies on a global scale with low-resolution (approximately 200 km) horizontal grids (Dai et al., 2014; ~~Dai et al., 2018~~; Goto et al., 2015b; [Dai et al., 2018](#)) and on the regional scale with high-resolution (10-25 km) horizontal grids (Goto et al., 2015a; Goto et al., 2016; Goto et al., 2019); moreover, the results ~~were have been~~ validated on a global scale with horizontal grids at high resolutions (ranging from 3.5 km to 14 km) but over a relatively short period of less than 1 month (Suzuki et al., 2008; Sato et al., 2016; Goto et al., 2017). The use and applications of this module are summarized in Goto et al. (2018). The aerosol module considers major tropospheric aerosol species, i.e., BC, particulate organic matter (POM), sulfate, dust and sea salt. BC is a primary particle that is emitted from anthropogenic sources and biomass burning. One-half of all BC particles emitted from anthropogenic sources are assumed to be hydrophobic, whereas the remainder are assumed to be hydrophilic as internally mixed particles with POM without any atmospheric aging (Takemura et al., 2005). These emitted aerosols are transported, diffused and removed through wet deposition in and below clouds by precipitation, dry deposition and gravitational settling, which are described elsewhere in the literature (e.g., Goto et al., 2015a; Goto et al., 2019). Especially, for the wet deposition of aerosols, the previous versions of the global climate model with a coarse resolution were updated to adapt to various assumptions to produce simulations with a finer resolution (Goto et al., 2019). [In the wet deposition aerosols coexist in both interstitial and inside clouds, and the interstitial fractions of aerosols are tuning parameters and, in this study, set at 0.5 for dust, 0.2 for sea salt, 0.5 for all POM, 0.9 for external BC and 0.5 for sulfate.](#) The secondary aerosol sulfate (the main secondary aerosol considered in this study) is formed from chemical reactions, namely, the oxidation of SO<sub>2</sub> by OH, ozone and H<sub>2</sub>O<sub>2</sub> in the atmosphere. The three-dimensional distribution of these oxidants is prescribed from the results of a chemical transport model, namely, the chemical atmospheric general circulation model (AGCM) for study of atmospheric environment and radiative forcing (CHASER), coupled to a conventional GCM named the Model for Interdisciplinary Research on Climate (MIROC) (Sudo et al., 2002). The sizes of dust and sea salt are divided into 10 bins (the centers are from 0.13 μm to 8.02 μm) and 4 bins (the centers are from 0.178 μm to 5.62 μm), respectively, whereas those of BC, POM and sulfate are assumed to be ~~one-mono~~modal with [single fixed constant](#) sizes (the radii are 0.1

5  $\mu\text{m}$  for internally mixed BC with POM,  $0.08 \mu\text{m}$  for Secondary organic aerosols (SOA), ~~and~~  $0.054 \mu\text{m}$  for external BC and  
10  $0.0695 \mu\text{m}$  for sulfate and the width ( $1.8$  for internally mixed BC with POM,  $1.8$  for SOA,  $1.53$  for external BC and  $2.03$  for sulfate). The sizes and widths are referred from Hess et al. (1998), Moteki et al. (2007) and Goto et al. (2008). For internally mixed BC with POM, SOA, sulfate and sea salt, i.e., hygroscopic particles, the sizes are functions of the relative humidity (RH) (e.g., Table 2 in Goto et al., 2011). For all aerosols, their optical products, i.e., their extinction coefficient and AOT, are calculated by their mass concentrations and properties, such as size, RH and refractive index according to Mie scattering (Sekiguchi and Nakajima, 2008). These optical parameters at a wavelength of 550 nm are evaluated by measurements. The refractive indexes are  $1.53-0.0055i$  for dust,  $1.50-10^{-8}i$  for sea salt,  $1.43-10^{-8}i$  for sulfate,  $1.53-0.006i$  for pure POM and  $1.75-0.44i$  for pure BC (Dai et al., 2014). The refractive indexes for internally mixed BC with POM are calculated by the volume-weight average. All parameters used in the HRM aerosol module also apply to those used in the LRM aerosol module. To evaluate the aerosol direct effect in the NICAM, the instantaneous radiative flux-forcing of the ARI (IRFari) is online calculated by the difference in the radiative fluxes with/without aerosol species in MSTRN-X; the effective radiative forcing of the ARI due to anthropogenic aerosols (ERFari) is also calculated by the difference in the radiative fluxes between two different experiments with/without anthropogenic aerosol species (but the emissions from biomass burning do not change in our assumption). In these two experiments with/without anthropogenic sources, the effective radiative forcing of the ACI due to anthropogenic aerosols (ERFaci) is also calculated by the difference in the cloud radiative fluxes; the method for calculating the ACI-ERFaci as an effective-ARFERFari is derived from Ghan (2013). Unfortunately, the calculations of the ERFaci ACI-under the pre-industrial era and the IRFari ARI-associated with each aerosol component under the present era are only-performed for only one year because of limitations of available computer resources. Therefore, the ERFaci ACI value and the IRFari ARI-value associated with each aerosol component are calculated using the one-year integration

### 2.3 Experimental design

Numerical experiments with the HRM (14-km horizontal grid) are carried out for 3 years, and experiments are also carried out with the LRM (56-km horizontal grid) for the same period. In both the HRM and the LRM, the number of vertical layers is set at 38, which is relatively small but was-has been still-used in previous studies (Kodama et al., 2015; Sato et al., 2016;

Sato et al., 2018). The heights of the layers are 80.8 m at the bottom to 36.7 km at the top of the model domain; 10 layers are used below a height of approximately 2 km. The timestep is set at 1 minute in both the HRM and the LRM, and the initial conditions are prepared by the meteorological fields estimated from the National Centers for Environmental Prediction (NCEP)-Final (FNL) (Kalnay et al, 1996) data on November 2011 for the model spinup. The analysis is initiated at the beginning of January 2012 and terminates ~~in~~ at the end of December 2014. The model runs without nudging the meteorological fields, i.e., in a free run. The sea surface temperature (SST) and sea ice are nudged by the results of the NICAM from Kodama et al. (2015).

The emission amounts of total BC were 5.6 Tg yr<sup>-1</sup> from anthropogenic sources in 2010 according to the Hemispheric Transport of Air Pollution (HTAP)-v2.2 emission inventory (Janssen-Maenhout et al., 2015) and ~~a~~ climatological average of 1.8 Tg yr<sup>-1</sup> from biomass burning over 2005-2014 from the Global Fire Emission Database version 4 (GFEDv4; van der Werf et al., 2017). The interannual variabilities of the emission from the biomass burning are shown in the supplemental figures (Figures S1 and S2) to show impacts of the climatological averages on the results in a specific year, indicating that the impacts can be mostly ignored with only a few exceptions: AOT over Canada and Siberia in 2012-2014 average (mainly section 3.2) and BC mass concentrations over the Pacific and over the Arctic in March-April 2008 (section 4.3). The injection height is set at the surface for anthropogenic sources and 1 km ~~height~~ for biomass burning in this study. ~~POM~~ Organic carbon (OC) is composed of both primary and secondary components; the emission amounts of primary ~~POM-OC~~ OC were 20.3 Tg yr<sup>-1</sup> for anthropogenic sources (HTAP-v2.2) and 39.7 Tg yr<sup>-1</sup> from biomass burning (GFEDv4). These ~~POM~~ OC values are converted by multiplying the corresponding values for particulate organic ~~aerosols-matter (POM)~~ by 1.6 for anthropogenic sources and 2.6 for biomass burning sources, whose values are used in several global aerosol models (Tsigaridis et al., 2014). ~~Secondary organic aerosols (SOAs)~~ are assumed to be particles by multiplying the emission fluxes of isoprene and terpenes provided by the Global Emissions Initiative (GEIA) (Guenther et al., 1990) using scaling factors. As a result, the amount of emitted SOAs was 22.2 Tg yr<sup>-1</sup>, which is comparable to the best estimates from recent studies (Tsigaridis et al., 2014). Sulfate is a secondary species formed from a precursor of SO<sub>2</sub>, of which 108.1 Tg yr<sup>-1</sup> is emitted from anthropogenic sources (HTAP-v2.2), 2.2 Tg yr<sup>-1</sup> is emitted from biomass burning (GFEDv4), and 3.1 Tg yr<sup>-1</sup> is emitted from volcanic eruptions (Diehl et al., 2012). Some SO<sub>2</sub> is formed from dimethyl sulfide (DMS), which is mainly emitted

~~mainly~~ from oceans and is calculated as a function of downward solar fluxes (Bates et al., 1987) ~~and~~; it is estimated to be 26.2 Tg yr<sup>-1</sup> (HRM) and 24.9 Tg yr<sup>-1</sup> (LRM) in this study. Dust and sea salt are primary particles, which are calculated inside the model using the wind speed at a height of 10 m. The emission flux of dust depends on the cube of the wind speed and empirical coefficients, which are determined by the soil moisture, as well as on the land use, and snow cover and tuning coefficients depending on the region (Takemura et al., 2000). The tuning parameters used in the HRM also apply to those used in the LRM. Over the sea surface without sea ice, the emission flux of sea salt depends on a power of 3.41 (Monahan et al., 1986), which is comparable to the best estimate of 3.5 (Grythe et al., 2014). The estimated emission fluxes for dust and sea salt are shown in section 3. In the preindustrial era to estimate both ERFari and ERFaci, the emission fluxes from anthropogenic sources and biomass burning for BC, POM and SO<sub>2</sub> are set to zero, but those from other sources, i.e., all natural sources, are identical to those used in the present era.

## 2.4 Data description

Table 1 summarizes the measurements used in this study for the model evaluation. Satellite observations greatly assist in better understanding the global model performance of optical properties. The Moderate Resolution Imaging Spectroradiometer (MODIS), a sensor on board the polar-orbiting satellites Terra and Aqua, observes both aerosols and clouds. The cloud products, i.e., COT only for warm-topped clouds and cloud fraction (CF) for all types of clouds, and the aerosol products, i.e., AOT, in collection 6 are retrieved with a grid of 1°×1° by a NASA algorithm (Platnick et al., 2015). For clouds, the MODIS-retrieved COT has some positive biases especially in high latitudes, due to high solar zenith angle (Grosvenor and Wood, 2014; Lebsock and Su, 2014). For the AOT, the combination method of Dark Target (DT) and Deep Blue (DB) is used and can retrieve AOTs even over the desert areas (Levy et al., 2013), but it does not retrieve AOTs over high-albedo areas covered by snow and some specific areas, which include caatinga/cerrado surfaces over eastern Brazil in June-July-August and over Australia in all seasons (Sayer et al., 2014). In addition, the vertical profiles of the aerosol extinction coefficients are derived from Cloud-Aerosol Lidar with Orthogonal Polarization CALIOP/Cloud-Aerosol Lidar and Infrared Pathfinder Satellite Observations (CALIPSO) version 3 provided by the NASA Langley Research Center

(LaRC) after an averaging operation with a grid of  $1^\circ \times 1^\circ$  under clear-sky conditions (Winker et al., 2013). The top-of-atmosphere (TOA) radiation fluxes, i.e., outgoing shortwave radiation (OSR), outgoing longwave radiation (OLR) and shortwave and longwave cloud radiative forcing (CRF), prepared by ~~a~~-the CERES\_EBAF\_Ed2.8 level-3 product are obtained from a sensor of the Clouds and the Earth's Radiant Energy System (CERES) experiment onboard Terra and Aqua

5 ~~in-using~~  $1^\circ \times 1^\circ$  grids by considering the diurnal variations of clouds (Loeb et al., 2009). The Baseline Surface Radiation Network (BSRN) observes surface radiation fluxes at sites worldwide (Ohmura et al., 1998). The data collected by the BSRN cover the period of 2008-2012; these data are climatologically averaged while considering missing data and are then converted to the selected 25 sites (global-surface solar radiation) and 20 sites (direct and diffuse radiations) in this study. The reanalyzed wind at a height of 10 m, which is important for analyzing the emissions of dust and sea salt in the NICAM, is

10 prepared in a product with a grid of  $2.5^\circ \times 2.5^\circ$  by the NCEP/National Center for Atmospheric Research (NCAR) reanalysis 1 (Kalnay et al., 1996). Precipitation, which directly causes the wet removal of aerosols, is compared with a product provided by the reanalysis data of the Global Precipitation Climatology Project (GPCP) (Adler et al., 2003). The abovementioned measurements can provide a global map of the horizontal distributions of these parameters, whereas the following measurements are performed at ground-based sites spread around the world (Figure 1). The Aerosol Robotic Network

15 (AERONET) (Holben et al., 1998) and SKYNET radiometer network (Nakajima et al., 1996) observe the AOT at sites worldwide, but only 135 AERONET sites and 5 SKYNET sites are used in this study. For the selection of these data, monthly mean values are calculated ~~by~~-using more than 90 samples in one month, and the annual mean values are averaged ~~by~~-using more than 7 months of data at each site. The China Aerosol Remote Sensing Network (CARSNET) also observes the AOT at 50 sites in China (Che et al., 2015) and directly provides climatological values for the period of 2002-2013. The

20 AOT and extinction values are calculated at the wavelength of 550 nm in the NICAM, whereas these values are retrieved at the wavelengths of 550 nm in MODIS, 500 nm AERONET and 532 nm in CALIOP. This study ignores the differences in the AOT values among the wavelengths of 500 nm, 532 nm and 550 nm because the magnitude is small (less than several percent). In addition, we compared the simulated AOT and aerosol extinction coefficient under ~~the~~-all-sky conditions with the satellite-retrieved AOT and coefficients under ~~the~~-clear-sky conditions, because the differences in the simulated AOT

25 between all-sky and clear-sky conditions are within 0.01 or 10% at a global scale ~~and at most 20% at a regional scale~~ (Figure

S3), which is consistent with the previous study (Dai et al., 2015), but it should be noted that regionally the differences reach up to 0.1 over some regions, such as the North Atlantic (Figure S3). The difference would be generally lower than that between the NICAM and satellite results. Aerosol mass concentrations are observed by multiple networks, namely, the Interagency Monitoring of Protected Visual Environments (IMPROVE) program, European Monitoring and Evaluation Programme (EMEP), Acid Deposition Monitoring Network in East Asia (EANET), China Meteorological Administration Atmosphere Watch Network (CAWNET) and University of Miami network. The IMPROVE-observed BC, POM and sulfate over North America are used at approximately 190 sites, whereas the EMEP-observed BC, POM and sulfate over Europe are employed at approximately 50 sites. Over Asia, the EANET-observed sulfate is used at only 35 sites, whereas the CAWNET-observed BC, POM and sulfate are used at 14 sites, but only in China (Zhang et al., 2012). The network managed by a group at the University of Miami releases both dust and sea salt mass concentrations at sites worldwide (e.g., Prospero et al., 1989), but only the 16 sites shown in Liu et al. (2007) are used in this study. BC measurements, especially over the Arctic, are obtained by applying an aethalometer or a particle soot absorption photometer (PSAP), which may include some biases (Sinha et al., 2017; Sharma et al., 2017); nevertheless, these measurements can still be a good reference for the evaluation of global models. Aircraft measurements of BC using a single-particle soot photometer (SP2; Schwarz et al., 2006) are also used for a ~~one~~+-year model evaluation (January, March, June, August and November) in 2009 over the Pacific Ocean under the High-performance Instrumented Airborne Platform for Environmental Research (HIAPER) Pole-to-Pole Observations (HIPPO) campaign (Schwarz et al., 2010; Wofsy et al., 2012), in March-April 2012 under the Aerosol Radiative Forcing in East Asia (A-FORCE) campaign (Oshima et al., 2012), and in April-May and July-August 2008 under the Arctic Research of the Composition of the Troposphere from Aircraft and Satellites (ARCTAS) campaign (Jacob et al., 2010). The uncertainties in the observed products used in this study are shown in each reference.

### 3 Results

First, the meteorological fields relevant to the aerosol distribution are compared between the satellite and reanalysis data. Aerosols are transported in the atmosphere by wind and are removed from the atmosphere mainly by wet deposition associated with ~~cloud~~-precipitation; however, some aerosols, i.e., dust and sea salt, are emitted through surface friction by



winds. Therefore, the simulated variables of wind, precipitation and clouds are evaluated. Second, the aerosols simulated by the HRM and LRM are compared with the multiple observations described in section 2.4. When measurements are not available in the model evaluation, only the difference between the HRM and LRM is discussed.

### 3.1 Meteorological fields

5 Figure 2 illustrates the annual, January and July averages of the wind directions and speeds at a ~~height of 10-m height~~ using the HRM-simulated, LRM-simulated and NCEP-reanalyzed winds. ~~The global distribution of the statistical metrics, i.e., Pearson correlation coefficient (PCC), normalized mean bias (NMB) and root-mean-square error (RMSE), for the annually averaged wind speeds between the NICAM simulations and NCEP-reanalysis data are illustrated in the supplement (Figure S4).~~ The global annual averages of both the HRM-simulated and ~~the~~LRM-simulated wind speeds (~~approximately 4.2 m s<sup>-1</sup>; 4.169 m s<sup>-1</sup> for HRM and 4.242 m s<sup>-1</sup> for LRM~~) are ~~slightly lower higher~~ than those of the NCEP-reanalyzed wind speeds (~~4.487 m s<sup>-1</sup>~~)~~by at most 10%.~~ ~~The differences in the wind speed between the models and NCEP over land are smaller than those over ocean. The correlations between the NICAM (both the HRM and the LRM) and NCEP are moderate with a PCC of approximately 0.58 (0.577-0.580) for the global averages, whereas the differences in the PCC between land (0.582 for HRM and 0.590 for LRM) and ocean (0.576 for HRM and 0.577 for LRM) are small. The global annual average RMSEs between the NICAM simulations and NCEP are calculated to be approximately 1.45 m s<sup>-1</sup> (1.446 m s<sup>-1</sup> for HRM and 1.461 m s<sup>-1</sup> for LRM), approximately one-third of the global averages. The RMSEs are relatively high over the Southern Ocean (45°S-70°S), with values of at most 5.0 m s<sup>-1</sup>. The NMBs are calculated to be -7.6% (HRM) and -5.8% (LRM) for the global averages. The RMSE and NMB over land are smaller than those over ocean. In Figures 2(a), 2(b) and 2(c), ~~The~~~~the~~ spatial patterns of the HRM-simulated and LRM-simulated winds are generally in agreement with those obtained from the NCEP-reanalysis data, ~~but although~~ there are ~~slight some~~ differences between the models and the NCEP ~~reanalysis data and between the HRM and LRM simulations.~~ The former ~~(the difference between the models and reanalysis data)~~ is predominantly caused by an underestimation over the Southern Ocean (within 45°S-~~90~~70°S) ~~with lower correlation (PCC), higher uncertainty (RMSE) and more negative bias (NMB) than other areas (Figure S4). More negative NMB values over land are also found in both HRM and LRM (Figure S4(g) and S4(h)), even though the NCEP wind speeds are generally less~~~~

than  $3 \text{ m s}^{-1}$  over land and is partly attributable to an overestimation over the western Pacific, the northern Indian Ocean and the eastern Pacific in the vicinity of Mexico. In January and July, the global averages of both the HRM-simulated and the LRM-simulated wind speeds are also lower than those of the NCEP-reanalyzed wind speeds by at most 10%. In January, the differences in the global averages of wind speed between the models and the NCEP reanalysis over land are larger than those over ocean, whereas in July those over land are smaller than those over ocean. In regions where sea salt is dominant over the Southern Ocean in both January and July and dust is the dominant over the Sahara in July, the differences in wind speeds between the HRM and LRM are relatively large. ~~the HRM simulated wind speeds are slightly lower than the NCEP-reanalyzed wind speeds but higher than the LRM simulated wind speeds, especially over the Southern Ocean, whereas in July, the HRM simulated wind speeds are lower than the NCEP reanalyzed and LRM simulated wind speeds, especially over the western Pacific and the northern Indian Ocean.~~ Although we expected the HRM-simulated wind speeds to be higher than the LRM-simulated wind speeds, our results do not confirm this behavior because the wind speed can be influenced by several complex mechanisms, such as clouds and radiation.

The precipitation simulated with the NICAM (both the HRM and the LRM) is generally comparable to the GPCP-reanalyzed precipitation, especially over the mid-latitudes and high latitudes (Figure 3a). The strongest precipitation is found at the Intertropical Convergence Zone (ITCZ), where the precipitation simulated by the NICAM is overestimated compared to that reanalyzed by the GPCP, and the HRM-simulated precipitation is closer to the GPCP-reanalyzed precipitation compared than to the LRM-simulated one. The annual global mean values of the precipitation rates are  $2.64 \text{ mm day}^{-1}$  (HRM-simulated),  $2.81 \text{ mm day}^{-1}$  (LRM-simulated) and  $2.64 \text{ mm day}^{-1}$  (GPCP-reanalyzed); the difference arises which is primarily because the LRM occasionally provides stronger precipitation along some coastlines than does the HRM (supplemental Figures S5(a,b,c)). ~~the~~ The HRM precipitation is closer to the GPCP precipitation than that of the LRM. Due to the coarseness of the horizontal grid spacing, the LRM tends to reproduce unrealistically strong convective clouds compared to the HRM. Such convective clouds can lead to strong precipitation.

The simulated clouds are also evaluated by zonal averages based on a comparison with satellite observations (MODIS/Terra and MODIS/Aqua). Because the cloud liquid water path (LWP) retrieved from satellites is highly uncertain (e.g., Lebesock and Su, 2014) and the simulated LWP is strongly correlated to precipitation (not shown), the comparison of the simulated

precipitation shown in Figure 3(a) can be considered one of a validation of cloud parameters. In Figure 3(b), the warm-topped COTs are shown, and their global averages are estimated to be 7.9 (HRM), 10.2 (LRM), 15.1 (MODIS/Terra) and 15.0 (MODIS/Aqua). The distributions of both the HRM and LRM results are also not very close to the MODIS retrievals (Figure 3(b) and supplemental Figures S5(d,e,f)). The possible reasons are the underestimation of warm-topped COT itself in the NICAM and the overestimation of warm-topped COT in MODIS, especially in high latitudes (Grosvenor and Wood, 2014; Lebsock and Su, 2014). Another possible reason is that a bias of the simulated cloud height in the NICAM. The differences in warm-topped COT (Figure 3(b)) between the HRM and LRM are consistent with those of precipitation (Figure 3(a) and supplemental Figures S5(d,e,f)). Figure 3(c) illustrates zonal averages of cloud fraction (CF) for all types of cloud (not just warm-topped clouds). ~~using the water phase CF and water phase COT in Figure 3(b) and 3(e).~~ The global averages of the CF are ~~0.06-63 (HRM), and 0.08-59 (LRM), whereas the global average of the CF in MODIS is 0.2874 (MODIS/Terra), and 0.75 (MODIS/Aqua).~~ Both simulated CFs are underestimated compared to the MODIS result, but the HRM results tend to be closer to the MODIS results than the LRM results over low latitudes from 30°S to 30°N as well as high latitudes from 60°N to 90°N, whereas the LRM results tend to be closer to the MODIS results than the HRM results over higher latitudes from 90°S to 30°S. These differences can be found in the global distribution shown in supplemental Figures S5(g,h,i). For the COT, a similar tendency (i.e., the NICAM simulated clouds are underestimated compared to the satellite observations) is found in Figure 3 (c), which shows global averages of 7.9 (HRM) and 10.2 (LRM), whereas the global average in MODIS is 15.1. Such discrepancy in clouds between global models, including the NICAM and the observations, can be found in previous studies (e.g., Nam et al., 2012; Kodama et al, 2015); therefore, our case also includes some common problems. ~~In terms of the zonal distribution, however, the HRM results tend to be closer to the MODIS results compared to that of the LRM over low latitudes from 30°S to 30°N. Due to the coarseness of the horizontal grid spacing, the LRM tends to reproduce unrealistically strong convective clouds compared to the HRM. Such convective clouds can lead to strong precipitation, which is why the LRM tends to reproduce stronger precipitation and larger clouds compared to the HRM.~~

For ~~the~~ aerosol wet removal, the ratio of precipitation to cloud water (RPCW) is one of the important variables, although this is not a pure ratio of both variables but the conversion ratio from cloud to precipitation. The RPCW at a height of 2\_-km height is calculated online using the model and plotted in Figure 3(d) and supplemental Figures S5(j,k). The global average of the RPCW at a height of 2\_-km height is calculated to be 0.143 (HRM) and 0.181 (LRM), which can be explained by the  
5 tendency that the LRM reproduces stronger convective clouds and precipitation, thus providing a quicker conversion from cloud to precipitation in the LRM compared than to in the HRM. Therefore, the wet removal rate in the HRM is slower than that in the LRM. This result is very important for determining the aerosol distributions.

To further evaluate the climatic impacts of clouds on the radiation field in the models, the TOA shortwave radiative fluxes and CRF between the NICAM and the satellite-based results are shown in Figures 3(e) and 3(f). Their global distributions are shown in the supplement (Figure S5(l,m,n,o,p,q)). The relevant TOA parameters for aerosols are the OSR and shortwave CRF (SWCRF) simulated by the HRM and LRM and retrieved by CERES. As shown in Figures 3(e) and 3(f), the global averages of these variables in the LRM appear closer to those in CERES than the averages of the HRM, which is caused by the results over the mid-~~latitudes~~ from 60°S to 30°S or from 60°N to 30°N~~-,~~ where the CF in the LRM is close to the MODIS results shown in both Figures 3(c) and supplemental Figures S5(l,m,n,o,p,q). Over the low latitudes from 30°S to  
10 30°N, where the both CF and COT in the HRM are is close to the MODIS results shown in Figures 3(~~bc~~) and 3(e), the zonal global distributions of the simulated SWCRF and OSR in the HRM are much closer to the those in CERES compared with than those in the LRM shown in Figures 3(e,f) and supplemental Figures S5(g,h,i). Interestingly, these shortwave radiative fluxes in both the HRM and ~~the~~ LRM are closer to the fluxes retrieved by CERES than those shown in the NICAM without aerosol components by Kodama et al. (2015). This finding indicates that aerosols and their interactions with clouds primarily  
15 affect low-level clouds (mainly water-phase clouds) and provide better results than previous results without aerosols. Such effects were considered in a very recent study by Kodama et al. (submitted2020). Although there are some differences between the NICAM and CERES, these estimates are generally within multimodel uncertainties (8 W\_m<sup>-2</sup> for the SWCRF and up to 11 W\_m<sup>-2</sup> for the LWCRF) derived from the current global climate models (Lauer and Hamilton, 2013).

To perform a precise validation of radiative fluxes, the surface shortwave radiative fluxes simulated by the NICAM are  
20 evaluated using in situ observations in Figure 4, which illustrates the scatterplots of the surface solar radiation (globalSSR),

and direct and diffuse ~~radiative fluxes~~ radiation between the observations and NICAM simulations under all-sky conditions at the ground-based BSRN sites (~~almost nearly~~ 20 sites around the world, i.e., North America, Europe, North Africa, Asia, and Oceania). The NICAM-simulated ~~global radiations~~ SSRs are very similar to the observations, exhibiting high ~~Pearson correlation coefficients~~ (PCCs) (PCC=0.89 in both the HRM and the LRM), a low ~~normalized mean bias~~ (NMB) in both 5 models (NMB=1.1% in the HRM and NMB=-0.3% in the LRM) and low uncertainties signified by small ~~root-mean-square errors~~ (RMSEs) (RMSE=-32 W<sub>m</sub><sup>-2</sup> in both the HRM and the LRM). When the ~~global radiation~~ SSR is decomposed into direct and diffuse ~~radiations~~ fluxes, however, the NICAM-simulated direct radiation fluxes are overestimated compared to the observations, while the NICAM-simulated diffuse radiation fluxes are underestimated. The correlations of these decomposed radiation fluxes are still high, except for the diffuse radiation in the LRM (PCC=0.63, which is still moderate). Moreover, the 10 biases of the decomposed radiation components are much larger than the bias of the ~~global radiation~~ SSR; the NMBs in the direct radiation are 28.2% (HRM) and 26.7% (LRM), whereas those in the diffuse radiation are -18.3% (HRM) and -20.4% (LRM). The differences in the ~~global radiation~~ SSR between the HRM and LRM are very small, but the HRM-simulated direct and diffuse radiations are slightly better than the LRM-simulated radiation fluxes. These results at the surface may not be consistent with the results of the clouds and TOA radiation fluxes shown in Figures 3(e) and 3(f), respectively, which is 15 likely because the number of samples ~~at from the~~ BSRN in Figure 4 is smaller than that ~~by of~~ the satellites in Figures 3(e) and 3(f). In addition, the BSRN sites do not cover the oceans, which cover a considerable proportion of the globe, thereby ~~not exactly affecting being consistent with~~ the global average ~~obtained from the satellites~~. Nevertheless, considering the model performance, the simulated clouds and radiation fluxes are generally acceptable for use in global aerosol simulations with a climate model.

## 20 3.2 Aerosol fields

Figure 5 shows the global distributions of the annual, January and July averages of the HRM-simulated, LRM-simulated, ~~MODIS/Aqua-retrieved~~, and MODIS/~~Terra~~-retrieved AOTs. The global annual averages of the HRM-simulated AOT (~~0.1770.175~~) and the LRM-simulated AOT (~~0.1740.170~~) are ~~overestimated within the differences between~~ compared to that ~~of~~ the MODIS/~~Aqua-observed-retrieved~~ AOT (~~0.1590.163~~) and MODIS/~~Terra~~-retrieved AOT (~~0.184~~), whereas those of the

HRM simulated and LRM simulated AOTs over land (0.215 and 0.209) are comparable to that of the MODIS retrieved AOT within 0.04 (approximately 20%). This means that both the HRM simulated and the LRM simulated AOTs over the ocean are overestimated. The same tendencies are also found over land (0.157 for HRM, 0.152 for LRM, 0.145 for MODIS/Aqua and 0.166 for MODIS/Terra) and ocean (0.227 for HRM, 0.221 for LRM, 0.217 for MODIS/Aqua and 0.234 for MODIS/Terra) in January and July. Regionally, however, the spatial distributions of both the HRM-simulated and LRM-simulated AOTs are different from those of the MODIS-retrieved AOTs. In the Southern Ocean, for example, the NICAM-simulated AOT is overestimated compared to the MODIS-retrieved AOT by at most 0.2. In July, the NICAM-simulated AOT over the Arabian Sea is ~~much~~ largely overestimated compared to the MODIS-retrieved AOT. Over land, where the MODIS-retrieved AOT is ~~still~~ the most uncertain, the NICAM-simulated AOT is overestimated in the Saharan Desert in July and underestimated in China in January. As a result, over land, both the HRM-simulated AOT and the LRM-simulated AOTs are underestimated in January and overestimated in July in comparison with the MODIS observations retrievals. Over Canada and Siberia where biomass burning often occurs in summer, the NICAM-simulated AOT tends to be largely underestimated compared to the MODIS retrievals, partly due to use of climatological emission inventories for the biomass burning as pointed out in section 2.3 and Figure S2. Figure 6 shows the global distributions of the statistical metrics, i.e., PCC, RMSE and NMB, for the annually averaged AOTs between the NICAM simulations and MODIS/Aqua retrievals are shown in the supplemental materials (Figure S6). The correlations between the NICAM (both the HRM and the LRM) simulations and MODIS/Aqua data are moderate with a PCC of approximately 0.410-47 (0.410470- for HRM and 0.413473 for LRM) for the global averages, and PCCs ranging from 0.432-463 (LRM) to 0.445-473 (HRM) for the land averages and PCCs ranging from 0.480 (HRM) to 0.499 (LRM) for the ocean averages. The spatial distribution of the PCC shows mostly positive values but displays negative values in some regions, such as Eastern Europe and the oceans, at high latitudes. The global annual average RMSEs between the NICAM simulations and MODIS/Aqua retrievals are calculated to be 0.146-134 and 0.150-140 (HRM and LRM, respectively), which are slightly lower than the global AOT averages (0.177-175 for HRM and 0.171-170 for LRM). The RMSEs are higher than those in other regions with relatively high AOTs, such as western Africa and western Asia near the Arabian Sea, in over the oceans within 40-45°S-70°S where the NICAM-simulated sea salt seems to be overestimated, and in eastern China and central Russia where the NICAM-simulated AOT is highly

underestimated compared to the MODIS-retrieved AOT. The RMSEs over land (~~0.213-210~~ ~~to-for HRM~~ and ~~0.226222~~ ~~for LRM~~) are higher than those over the oceans (~~0.114-095~~ ~~to-for HRM~~ and ~~0.115096~~ ~~for LRM~~), primarily because the AOTs over the oceans are lower than those over land but also because those over deserts are higher due to the presence of dust. The NMBs are calculated to be ~~10.36.8%~~ (HRM) and ~~7.13.7%~~ (LRM) for the global averages, ~~and +2.14.5%~~ (HRM) and ~~-1.01.9%~~ (LRM) for the land averages ~~and 7.9% (HRM) and 4.6% (LRM) for the ocean averages~~. High positive biases are found in the same regions with relatively high RMSEs. In the regions where both the bias and the uncertainty are high, the differences in the RMSE and NMB between the HRM and LRM are small; therefore, the high bias and high uncertainty in western Africa, western Asia, the North Atlantic and the oceans within ~~40~~45°S-70°S cannot be solved by employing finer horizontal resolutions. As mentioned in section 2.4, because the NICAM-simulated AOT under the all-sky condition and the MODIS-retrieved AOT under the clear-sky condition are compared, the differences in the AOT between the NICAM and MODIS may be partly explained by the differences in the AOT between under the all-sky and clear-sky conditions, especially over the North Atlantic where the HRM-simulated AOT under the all-sky condition is larger than that under the clear-sky condition by up to 0.1 (Figure S3). Over the oceans within 45°S-70°S, however, there are no clear tendency, with a mixture of positive and negative biases (Figure S3). The largest difference in the NMBs between the HRM and LRM is found in the vicinity of the western Pacific and the northern Indian Ocean, where the difference in the precipitation between the two is also large, which is partly shown in Figure 2(a). In these regions, although the AOTs and their RMSEs are lower than those in other regions, aerosols could be important because they act as a main trigger for the onset of the monsoon season (e.g., Li et al., 2016) and because sporadic biomass burning occurs throughout the dry season.

Although polar-orbiting satellites cover large areas and provide global AOT distributions, the accuracy of satellite-retrieved AOTs is lower than that retrieved from ground-based measurements. Figure ~~7-6~~ shows scatterplots of the AOTs between the NICAM simulations and satellite-in-situ observations, including AERONET, SKYNET and CARSNET, whose site locations are shown in Figure 1. A comparison of the AOTs between the NICAM simulations and satellite retrievals shows almost no differences between the HRM and LRM, but a comparison with in-situ measurements shows differences between the HRM and LRM. The HRM-simulated AOTs have a higher correlation (PCC=0.471), lower uncertainty (RMSE=0.21), and lower bias (NMB=-20.2%) in the annual averages ~~compared to~~than the LRM-simulated AOTs with PCC=0.356, RMSE=0.24 and

NMB=-26.6%. Furthermore, the tendencies obtained in the annual averages are similar to those obtained in the January and July averages; ~~this is probably because the sites are located over land, including a variety of regions (not only dusty areas, which cause the overestimation of the modeled AOTs), where the HRM simulated AOTs are closer to the MODIS results (Figures 6 and 7). When the HRM-simulated AOTs with a grid converted to 0.5°×0.5° by averaging 16 pixels of 0.125° grids~~ are evaluated using the in-situ measurements, the statistical metrics are worse than those in the original grids, i.e., lower PCC (-0.014), higher RMSE (0.003) and larger NMB (-0.8%) with regard to the annual averages (Table S5), but still higher than those in the LRM results. This finding suggests that the 0.5° grid is not fine enough to correspond to the representative value at the observation sites and the differences in AOTs between the HRM and LRM are not due to the grid conversion but the model resolution itself. More details of the differences between the HRM and LRM are discussed in section 4.1.

To further investigation ~~of~~ these differences in the aerosol components AOTs, ~~the differences in the decomposed AOT components in the HRM and LRM are compared in Figure 8. The global annual difference in the total AOT is calculated to be -0.005, i.e., -3.3%, which is very small. For dust and sea salt, the annual and global averages are also very small (within 0.001 or approximately 1.5%). Near the regions where these aerosols are emitted from the surface, however, the differences range from -0.1 to +0.2. For carbon and sulfate, the global and annual differences in the AOT are relatively high (-5.2% for carbon and -11.3% for sulfate). Compared to the results for dust and sea salt, the differences in the AOTs between the HRM and LRM are localized. The differences in the carbonaceous AOT are shown over land, where biomass burning occurs and anthropogenic sources are emitted. When the values in the source region are positive, those in the outflow region are negative since the simulated carbonaceous aerosols are mostly POM and the most common emission inventories are used in both the HRM and the LRM. This phenomenon is remarkable in biomass burning areas such as central Africa, South America and the western Pacific. In India, the HRM simulated carbonaceous AOT is higher than the LRM simulated AOT. For sulfate, most regions such as China, India and the Middle East show negative values; i.e., the HRM simulated AOTs are clearly higher than the LRM simulated AOTs.~~

~~Since the AOT depends on not only aerosol mass loading but also RH,~~ the mass loadings of the aerosol components are directly compared between the HRM and LRM in Figure 97. For additional references, the differences in the decomposed AOT components as well as the aerosol surface mass concentrations between the HRM and LRM are shown in the



supplemental Figures S7 and S8. As shown in these AOT comparisons, ~~†~~The global and annual differences in the dust mass loadings are very small ( $0.32 \text{ mg m}^{-2}$  or 0.6%), although the regional differences are not small in the outflow regions, such as the Arabian Sea. The difference in the sea salt mass loadings between the HRM and LRM is larger than that in the sea salt AOTs (supplemental Figure S7(c)) by more than a factor of two, which probably cancels the difference in the mass loadings by the RH difference. The difference in the sulfate mass loadings ( $-0.48 \text{ mg m}^{-2}$  or -15.7%) is larger than that in the sulfate AOTs (-11.3%) shown by supplemental Figure S7(d). The carbon components can be decomposed into POM, water-soluble BC (WSBC) and water-insoluble BC (WIBC). The global and annual averages of the differences in these mass loadings between the HRM and LRM are all negative and are calculated to be  $-0.20 \text{ mg m}^{-2}$  (-9.9%) for POM,  $-0.01 \text{ mg m}^{-2}$  (-10.4%) for WSBC and  $-0.04 \text{ mg m}^{-2}$  (-32.1%) for WIBC. The regional differences in POM and WSBC are noticeable near the source regions, whereas those in WIBC are found to be not only near the source regions but also largely distributed even throughout the Arctic. These comparisons of aerosol mass loadings show that the differences in the components, especially WIBC, sulfate, WSBC and POM, between the HRM and LRM are remarkable.

The global budgets of these aerosols are summarized in Table 2, which includes the mass loading or column density, chemical budget (emissions and deposition through dry processes, gravitational settling and wet processes), and atmospheric lifetime. To support the analysis, global distributions of the differences in these budgets between the HRM and LRM are shown in the supplement (Figures S9-S16). These values of the global budgets are generally within the variabilities and uncertainties estimated by other global models (e.g., Textor et al., 2006), except for the lifetimes of some aerosols. The lifetime is defined as a ratio of column burden to emission or total deposition fluxes in a global average (e.g., Seinfeld and Pandis, 2006; Textor et al., 2006); therefore, the differences in the lifetime between the HRM and LRM are caused by those in the column burden or the emission flux. The global annual sums of the emission fluxes are almost identical to those of the total deposition fluxes in global annual averages for usual global models (e.g., Textor et al., 2006; Matsui and Mahowald, 2017). While the differences in the emission fluxes of POM, BC, WSBC and WIBC between the HRM and LRM are almost zero (relative difference of less than 1%, as shown in Table 2 and Figure S9), those for dust, sea salt and the sulfate are not zero (relative difference of more than 3%, as shown in Table 2 and Figure S9) because these emissions are calculated online. This means that the differences in the lifetimes of POM, BC, WSBC and WIBC between the HRM and LRM are mainly

caused by the differences in the column burdens, whereas differences for dust, sea salt and sulfate are caused by differences in both their column burdens and their emission fluxes.

~~The lifetimes of sulfate are estimated to be 2.38 days (HRM) and 2.05 days (LRM), which are smaller than those (ranging from 3.3 days to 4.9 days) in the literature (Textor et al., 2006; Matsui and Mahowald, 2017). For sea salt, the~~

5 lifetime of sea salt is approximately 0.2 days (both the HRM and the LRM), which is ~~in-at~~ the lower limit of ~~the~~ references prior studies (0.20-0.98 days by Textor et al., 2006; Matsui and Mahowald, 2017; Bian et al., 2019). Among the differences in the budgets between the HRM and LRM, those of the wet deposition flux of sea salt are large over the most of ocean and estimated to be 20% globally (Table 2 and Figure S11(c)). This is mainly due to the larger RPCW values shown in Figure 3(d). For dust, the differences in the dust column and budgets as well as the lifetime between HRM and LRM are very

10 small in a global average (Table 2) but regionally large (Figure S10). Since-Because the lifetimes of POM and BC are within the variabilities reported ~~among-from the~~ previous studies, the wet deposition fluxes, especially over the oceans, seem to be larger (Table 2 and Figures S13 and S14), which is consistent with the results of sea salt and mainly due to the larger RPCW values ~~shown in Figure 3(d) using cloud system resolving models~~. The lifetimes of ~~the~~ WIBC are comparable to ~~that-those in~~ proposed by a previous study by Goto et al. (2012) but much longer than that of the previous studies that considered the

15 atmospheric aging (Chung and Seinfeld, 2002; Goto et al., 2012). The differences in the lifetimes between the HRM and LRM are large and estimated to be -22% for BC, -10% for WSBC and -33% for WSBC globally. The differences in their lifetimes or their column burdens between the HRM and LRM are mainly caused by wet deposition (Table 2 and Figures S14, S15 and S16). The wet deposition fluxes for aerosols in the HRM are generally smaller than those in the LRM, because the RPCW values in the HRM are smaller than those in the LRM. Therefore, over the outflow region, the wet deposition

20 fluxes for BC, WSBC and WIBC in the HRM are smaller than those in the LRM. However, over land where the aerosol concentrations are large, the wet deposition fluxes in the HRM are larger than those in the LRM because the wet deposition fluxes are proportional to the aerosol concentrations (e.g., Seinfeld and Pandis, 2006). Near the source region of BC, for example in China, wet deposition in the HRM is larger than that in the LRM (Figure S14), mainly due to the larger concentrations, even though the RPCW values in the HRM are larger than those in the LRM.

5 Additionally, the differences between the HRM and LRM in the wet deposition flux of sea salt and the atmospheric lifetimes of both BC and WIBC are relatively large (more than 20%), whereas the differences in the dust column and budgets are very small. The lifetimes of sulfate are estimated to be 2.38 days (HRM) and 2.05 days (LRM), which are smaller than those (ranging from 3.3 days to 4.9 days) in the literature (Textor et al., 2006; Matsui and Mahowald, 2017). Sulfate aerosols are produced through SO<sub>2</sub> oxidation in the gas and aqueous phases. The sulfate production through both phases in the HRM is generally larger than in the LRM. The global annual relative differences through the gas and aqueous phases between the HRM and LRM are estimated to be -0.5 TgS yr<sup>-1</sup> (-3.6%) and -1.1 TgS yr<sup>-1</sup> (-2.5%) (Table 2, Figure S9(c) and Figure S9(d)), but their differences vary regionally, especially in East Asia. These differences between the HRM and LRM can be explained by the concentrations of both SO<sub>2</sub> and clouds, although the HRM-simulated clouds tend to be smaller than the LRM clouds, as shown in Figure 3. Therefore, these differences between the HRM and LRM are solely due to SO<sub>2</sub> concentration. This is also why the sulfate production rates through both the gas and aqueous phases in the HRM are greater than those in the LRM (Figure S9(d) and S9(e)). As a result, the HRM-simulated sulfate concentrations increase, but the wet deposition for sulfate in the HRM is larger than that in the LRM (Table 2 and Figure S12), as explained for BC that the wet deposition fluxes are proportional to the aerosol concentrations, even though the RPCW values in the HRM are larger than those in the LRM. In the end, the HRM-simulated sulfate in terms of the column burden is larger than in the LRM by 16% in a global average (Table 2), which mainly determines the differences in the lifetimes for sulfate. Therefore, the impact of the horizontal resolution (14-km and 56-km grid spacings), which determines the meteorological parameters including wind, vertical mixing, diffusion, clouds and precipitation fluxes, on dust is very small, but sea salt, sulfate and BC are strongly influenced.

20 ~~Since~~ Because almost all aerosols are emitted from the surface, evaluations of the surface mass concentrations of those aerosols are important. The supplement (Figure ~~40~~ S8) shows the global distributions of the differences in the annual averages of the aerosol surface mass concentrations between the HRM and LRM. Compared to the differences in the AOTs (Figure S7) and mass loadings (Figure 7), the differences in the surface mass concentrations are generally smaller but have different signs for carbonaceous aerosols, i.e., POM, WSBC and WIBC. This is probably because the NICAM-simulated biomass burning-emitted aerosols, i.e., parts of carbonaceous aerosols, are ejected ~~to~~ at a height of 1 km (not the surface).

25

For dust, sea salt and sulfate, the horizontal patterns of the differences in their surface mass concentrations between the HRM and LRM are similar to those ~~in~~of the AOTs and mass loadings. The simulated surface mass concentrations are evaluated by the measurements described in section 2.4, and the results are shown in Figures ~~11-8~~ and ~~12-9~~, which illustrate scatterplots of the annually averaged surface mass concentrations of the aerosol species between the satellite measurements and NICAM simulations. The annual averages of three compounds, i.e., sulfate, BC and POM, are compared over North America, Europe and Asia, whereas not only the annual averages but also the January and July averages of dust and sea salt are compared at sites worldwide due to their large seasonal variabilities. The statistical metrics for the comparison are also shown in Table S6 to Table S8. The model results in both the HRM and the LRM exhibit a high correlation, low uncertainty and low bias, except for the relatively high negative bias for BC and POM with NMBs ranging from 46% to 56%. Although the differences in the statistical metrics between the HRM and LRM are very small, the metrics of the HRM are generally better than those of the LRM. As mentioned in the AOT comparison using in-situ measurements, although a 0.5° grid may not be fine enough to represent the observation sites, the difference between the HRM and LRM is not due to the analysis grid size but the model resolution itself (Table S6). ~~The~~ BC and most POM simulated in the NICAM are primary compounds that tend to be localized near the source region; ~~thus, so~~ the simulated BC and POM distributions with ~~the~~ finer grid spacing are expected to be better. The differences in the simulated sulfate, which is a secondary component, between the HRM and LRM are caused both by differences in the transport of SO<sub>2</sub> and sulfate and by the cloud distributions related to sulfur chemistry (Goto et al., 2015b). The lower- conversion ratio of the simulated precipitation to the simulated clouds (Figure 3(d)) in the HRM ~~compared to~~than that ~~in~~of the LRM results in a longer lifetime for sulfate (Table 2) and provides larger values for the HRM-simulated sulfate. Even the HRM provides large underestimations of the simulated BC and POM, which is mainly because of their underestimation in China. The possible reasons for this phenomenon are probably the underestimation of BC and POM emissions and possibly the excessive localization of measured values. These findings are consistent with the results of the AOT underestimation in ~~China-Asia~~ (Figure ~~7-6~~).

The annual and January averages of both the HRM-simulated and the LRM-simulated dust mass concentrations at the available sites are comparable to the measurements. The correlations are high to moderate (the PCCs of the annual averages are approximately 0.9, and the PCCs of the January averages are approximately 0.65), the uncertainty is relatively small (the

RMSEs of the annually averaged HRM- and LRM-simulated concentrations are less than  $4 \mu\text{g m}^{-3}$ , while the January-averaged HRM-simulated concentration is  $9 \mu\text{g m}^{-3}$ , and the January-averaged LRM-simulated concentration is  $4 \mu\text{g m}^{-3}$  and the bias is relatively low (the NMBs range from -22% to +37%). However, the uncertainty and bias in the July averages are higher than those in the annual and January averages, mainly because the emission fluxes from the Saharan and Arabian  
5 Deserts are larger in summer (July). The NMBs are calculated to be -64.8% (HRM) and -55.6% (LRM), the RMSEs are calculated to be  $10.6 \mu\text{g m}^{-3}$  (HRM) and  $10.2 \mu\text{g m}^{-3}$  (LRM), and the correlations are high (PCC=0.75 for the HRM and PCC=0.68 for the LRM).

For sea salt, the correlation is poor, except for the HRM in January, where the correlation is moderate with PCC=0.62. ~~Since~~  
~~Because~~ the emission fluxes of sea salt are strongly correlated with winds (the power of 3.41 mentioned in section 2.3), the  
10 differences in the simulated wind speeds shown in Figure 2 strongly affect the reproductivity of sea salt. The difference at the wind speed of  $1.5 \text{ m s}^{-1}$  provides the error in the sea salt emission flux of approximately 4. Therefore, a small error in the simulated wind speed can easily cause biases in the simulated sea salt emissions and its mass concentrations. Nevertheless, the bias and uncertainty of the NICAM-simulated sea salt are not large. The RMSE ranges from 7.7 to  $8.2 \mu\text{g m}^{-3}$  for the HRM and from 7.9 to  $10.6 \mu\text{g m}^{-3}$  for the LRM, while the NMB ranges from -29% to -18% for the HRM and from -41% to -  
15 31% for the LRM. Therefore, without nudging the meteorological fields, it is difficult to obtain results similar to the measurements in the sea salt simulation, even with the fine horizontal grid spacing of 14 km in this study.

In summary, both the HRM-simulated and the LRM-simulated aerosols are generally close to the MODIS-retrieved results and in-situ measurements, although ~~the~~ differences in the column burden between the HRM and LRM are found for sulfate (11.3%), WIBC (32.1%), POM (9.9%) and WSBC (10.4%). These are mainly caused by the modification of aerosol-cloud-  
20 precipitation interactions through wet deposition ~~in-under~~ the different horizontal grid spacings. The above verification of the relevant variables suggests that both the HRM and ~~the~~-LRM can be applied for a current global climate aerosol model. However, several important differences between the HRM and LRM have not been addressed in detail; therefore, section 4 discusses the remaining issues associated with using the HRM relative to the LRM.

## 4 Discussion

In section 3, the modeled results using the HRM and LRM are shown as annual or monthly averages and/or global distributions of aerosol species using multiple measurements, i.e., MODIS, AERONET, IMPROVE, etc, against multiple variables, i.e., AOT and surface aerosol mass concentration for each aerosol component. This finding indicates that the results of both the HRM and ~~the~~LRM are generally within the uncertainties of the measurements and other global models; furthermore, the differences in these variables between the HRM and LRM are not large in terms of the annual and global averages. However, some remarkable differences are found at the regional scale and in the results for sulfate and BC, but these differences and their mechanisms have not been thoroughly investigated. In section 4, more detailed comparisons are carried out to reveal both the differences in the simulated variables between the HRM and LRM and the advantages of using ~~a~~the HRM.

### 4.1 Effects of a fine grid spacing on aerosol fields

A high-resolution horizontal grid spacing has the potential to provide more realistic values of ~~the~~model subgrid variability and possibly more realistic averages, for example, for aerosol concentrations in highly polluted areas, because most aerosols are emitted from heterogeneous hotspots on the surface. Figure ~~13-10~~ shows the mass concentrations of both BC and sulfate and the AOTs at the relevant sites, which are selected from the most polluted sites in the monthly averages within typical domains such as the United States, Europe and China. These results are derived from the results shown in Figures ~~7-6~~ and ~~11-8~~. In Figure ~~13-10~~, three sets of results are compared: the HRM with the original grid of  $0.125^{\circ} \times 0.125^{\circ}$ , the HRM with the grid converted to  $0.5^{\circ} \times 0.5^{\circ}$  and the LRM with the original grid of  $0.5^{\circ} \times 0.5^{\circ}$ ; hereafter, these models are referred to simply as HRM, HRM- $0.5^{\circ}$  and LRM, respectively. ~~As in already mentioned in section 3, comparisons of the aerosol mass concentrations and AOTs at the relevant sites are carried out using the model with the original grid size, but since an exact comparison using two models requires the same grid size, the HRM- $0.5^{\circ}$  is newly introduced ~~in this section~~ to clarify the differences caused only by the grid size. The results show that the HRM-simulated BC concentrations are the largest among the simulations ~~since because~~the BC is a primary aerosol and the relevant sites are located near BC emission sources. The~~

HRM-0.5°-simulated BC concentrations are larger than the LRM-simulated BC concentrations. For example, during April in Chengdu, China, the simulated BC concentrations are 3.3  $\mu\text{g}_m^{-3}$  (HRM), 2.8  $\mu\text{g}_m^{-3}$  (HRM-0.5°) and 2.2  $\mu\text{g}_m^{-3}$  (LRM), which indicates that the difference among the simulated BC concentrations is approximately 35%. The differences, i.e., the relative ratios of the HRM-0.5° or LRM to the HRM results, range from -63% (PHOE1, United States, December) to -2.5% (ATLA1, United States, September), ~~with a median of -23%.~~ Because the range represents the spatiotemporal variability of the selected sites and months, an estimation of bias, i.e., NMB, is meaningful and is found to be -18.4%. Compared ~~to~~ ~~with~~ the measurements, especially in China, even the HRM-simulated results tend to be underestimated. This is probably because the BC emission inventory in China is underestimated (e.g., Goto et al., 2015b) or the 14-km grid spacing is not sufficient to resolve such high concentrations in highly dense urban areas, which may suggest the importance of using a much finer horizontal resolution in the simulation.

For sulfate, which can serve as a representative secondary aerosol, and the AOT, which is highly influenced by RH, the HRM-simulated results are generally the best among the simulations, and the HRM-0.5°-simulated results are larger than the LRM-simulated results. For example, during August at BALT1 in the United States, the sulfate concentrations simulated by the HRM and HRM-0.5° range from 9.6 to 10.0  $\mu\text{g}_m^{-3}$ , whereas that simulated by the LRM is 0.9  $\mu\text{g}_m^{-3}$ , which is very different from the measurement (7.6  $\mu\text{g}_m^{-3}$ ). The differences in the simulated sulfate concentrations among the simulations at all sites range from -91% (BALT1, United States, August) to +18% (ATLA1, United States, May), with an median-NMB of -45.3%. Underestimated simulated sulfate concentrations are also found in China and Vietnam, whereas such underestimations are not generally found in the United States or Europe. At some sites, the LRM-simulated AOTs are the largest among the simulations. These complex results imply complicated situations where the AOT depends on not only the aerosol burden but also the RH, whereas the BC mass concentration near the surface strongly depends on BC emissions. The differences in the simulated AOT concentrations among the simulations at all sites range from -49% (Nanning, China, August) to +223% (Nanning, China, August), with an median-NMB of -42.6%. The median-NMB values of the differences in the AOT among the simulations are smaller than those in sulfate by 35% and those in BC by 2218%. This finding suggests that the primary product, i.e., BC, is the most influenced by the grid size, but the secondary product, i.e., sulfate formed from oxidation of SO<sub>2</sub> (this is a primary product) and removal through precipitation, and the complex product, i.e., AOT comprising various aerosols including primary and secondary particles and being highly

~~dependent on RH, are less influenced by the grid size. Therefore, the impacts of higher horizontal grid spacings on model performance for secondary products, such as sulfate, and complex products, such as AOT, are weaker than those for primary products, such as BC. The differences in secondary and tertiary products among the different horizontal grid spacings cannot be explained simply by the grid size.~~

5 In addition to the impact of the model grid size on the monthly averages of the aerosol concentrations at the relevant sites, the temporal variations in the aerosol concentrations are also investigated. Such comparisons were carried out by Lin et al. (2017), who investigated the marine aerosol subgrid variability using a regional HRM over the southern Pacific Ocean. Lin et al. (2017) estimated variabilities in the aerosol mass concentrations of 15% near the surface and 50% in the free troposphere in a 180-km×180-km domain using 3-hourly 3-km×3-km original grids for October 2008. In this study, these

10 variabilities of the AOT, CCN at a height of 2 km, COT and precipitation are calculated ~~in~~on a 1°×1° domain using 6-hourly 14-km×14-km original grids for one year (Figure ~~44~~11). The global and annual averages of the ratio for the AOT are calculated to be 28.5% (HRM) and 16.6% (LRM). The value obtained from only the HRM ranges between the two values obtained by Lin et al. (2017). For the CCN at a height of 2 km, the values are relatively small (7.6% for the HRM and 4.1% for the LRM), partly because the simulated CCN may be underestimated compared to the measurements, which show at least

15 100 cm<sup>-3</sup> even over the oceans (e.g., Heintzenberg et al., 2000). Clouds and precipitation are also strongly influenced by subgrid variability (e.g., Pincus et al., 1999; Hakuba et al., 2013; Boutle et al., 2014). The global and annual averages of the ratio for the COT are calculated to be 80.0% (HRM) and 22.9% (LRM), whereas the global and annual averages of the ratio for precipitation are calculated to be 216.2% (HRM) and 77.9% (LRM). These values ~~of~~for clouds and precipitation are much larger than those obtained ~~by~~for aerosols. The relative differences in these parameters between the HRM and LRM are

20 calculated to be 1.7 (AOT), 1.9 (CCN), 3.5 (COT) and 2.8 (precipitation). These results clearly indicate the importance of high-resolution simulations, especially for reproducing extreme phenomena related to aerosol, clouds and precipitation such as in the Amazon where the subgrid variabilities of both COT and precipitation in the HRM are high.



## 4.2 Arctic

Aerosols over the Arctic, especially BC, are ~~very incredibly~~ important due to their impact on climate change (e.g., Willis et al., 2018). Unfortunately, it is generally difficult for global models to properly reproduce ~~the~~ aerosols over the Arctic (e.g., Shindell et al., 2008; Eckhardt et al., 2015; Sand et al., 2017). To solve this issue, many improvements to BC models have

5 been applied by previous studies to microphysics processes, including aging and wet deposition processes (e.g., Liu et al., 2011; Lund and Berntsen, 2012; Marelle et al., 2017), and to the horizontal resolution to resolve the fine structures of clouds (e.g., Ma et al., 2014; Sato et al., 2016; Raut et al., 2017). Figure ~~16-12~~ illustrates the monthly variations in the BC and sulfate concentrations at three sites over the Arctic using four simulations: the HRM, LRM, LRM-macro (56-km grid spacing but using ~~large scale cloud condensation (Le Treut and Li, 1991) instead of the NSW6 cloud microphysics scheme~~

10 ~~and a cumulus parameterization (Chikira and Sugiyama, 2010) for the coarse grid spacing as~~ a cloud macrophysics module ~~described in section 2.1~~) and very low-resolution NICAM model (220-km grid spacing ~~using a cloud macrophysics module described in section 2.1~~) used in Dai et al., 2014; Goto et al., 2015b; Dai et al., 2018; ~~this simulation is called the VLRM-macro hereafter~~ with the cloud macrophysics module. Similar to previous studies (e.g., Shindell et al., 2008; Eckhardt et al., 2015; Sand et al., 2017), the LRM-macro- and VLRM-macro-simulated BC concentrations are also very different from the

15 measurements. At Alert and Zeppelin, for example, the LRM-macro- and VLRM-macro simulated BC concentrations are highly underestimated, and the observed variation cannot be reproduced. However, both the HRM and ~~the~~ LRM with the cloud microphysics module succeed in simulating the observed seasonal variation (with the maximum in spring and the minimum in summer), but the HRM results are closer to the observations than the LRM results as a result of WIBC, as shown in Figure ~~97~~. At Barrow, the finer grid spacing of the LRM-macro-simulated BC provides better results than the

20 VLRM-macro-simulated BC, but the former is still underestimated compared to the measurements, especially in spring. The good performance of the HRM and even the LRM can be found in the simulation of sulfate. Between the HRM and LRM, the largest difference in the surface BC mass concentrations between the HRM and LRM reaches 30% in spring. The differences in the simulated BC and sulfate concentrations between the HRM, LRM, LRM-macro and VLRM are mainly explained by differences in the ~~cloud fraction~~CF and aerosol wet deposition, as shown in Sato et al. (2016). Near the aerosol

25 source region, the simulated aerosol concentrations are strongly affected by their emission fluxes, but in remote areas such as

the Arctic, aerosol wet deposition, which is directly related to cloud and precipitation processes, becomes important for their atmospheric lifetimes. In the LRM-macro and VLRM-macro simulations, the wet deposition process in winter results in unrealistic seasonal variations over the Arctic. The importance of wet deposition over the Arctic has also been noted by previous studies, such as Garrett et al. (2011), whose findings are consistent with our study. In addition, our results clearly show the importance of using numerical models with ~~the-a~~ cloud microphysics module, which introduces prognostic precipitation and does not diagnose the assumed ~~cloud-fraction~~CF used in the macrophysics cloud module. In summary, these processes related to hydrometeors and thus aerosol wet deposition strongly affect the aerosol simulations, especially over the Arctic.

#### 4.3 Vertical distributions of aerosols

Thus far, the horizontal distributions of the aerosols and their species are compared between the HRM and LRM and are validated using available measurements, but their vertical distributions are important for radiative forcings, especially BC (e.g., Haywood and Shine, 1997; Samset et al., 2013), although the model variability of BC is large (e.g., Textor et al., 2006; Kipling et al., 2016). Figure ~~46-13~~ shows the vertical profiles of the simulated and CALIPSO-retrieved aerosol extinction coefficients in 12 different regions, which are generally based on the definition in Koffi et al. (2016) by comparing Aerosol Comparisons between Observations and Models (AeroCom) models with CALIOP. The results of the HRM and LRM are generally comparable to those retrieved from CALIOP, but remarkable differences between the NICAM simulations and CALIOP retrievals are found in various regions, such as South America (panel k in Figure ~~4613~~) and North Africa (panel h in Figure ~~4613~~). In South America, the plume height is approximately 4 km in the NICAM simulations but approximately 2 km in the CALIOP measurements. As a result, the aerosol extinction coefficients of both the HRM and the LRM are underestimated below a height of 3 km. This may be consistent with the AOT results shown in Figures 5 and ~~76~~, which show the underestimation of the AOT in the NICAM simulations compared to the MODIS and AERONET retrievals caused by the underestimation of biomass burning emissions or the overestimation of transport to upper-level areas. In northern Africa, where dust is a major component but the simulations exhibit large variabilities among the global models (e.g., Kim et al., 2014), both the HRM-simulated and the LRM-simulated extinction coefficients are overestimated compared to those

retrieved from CALIOP, although the vertical profiles simulated by both the HRM and the LRM are comparable to those retrieved from CALIOP. This is also consistent with the overestimation of the AOT shown in Figures 5 and [76](#). The reason for this overestimation is probably attributed to the overestimation of dust emission fluxes in the NICAM simulations, which can be attributable to several sources: the overestimation of the wind speeds at a height of 10 m (Figure 2), the underestimation of soil moisture, and the failure to appropriately tune the models for dust emissions, although the global amount of emitted dust is within the variability estimated by other global models shown in Table 2. In addition, this finding suggests that the difference in the transport processes between different horizontal grid spacings is very small. Below a height of 5 km, the differences in the extinction coefficients between the HRM and LRM are small in all regions except for East China and the northwestern Pacific. It should be noted that the simulated extinction coefficient may not be overestimated above a height of 5 km, because optically thin aerosols are often undetected by [CALIOP](#) ~~CALIPO~~ in the upper troposphere and the CALIOP regionally averaged extinction coefficient tends to be underestimated above 5 km (Watson-Parris et al., 2018).

Vertical observations of aerosol species are still limited, but recent measurements of vertical BC by flight campaigns such as HIPPO are available for a model evaluation (e.g., Schwarz et al., 2013; 2017; Samset et al., 2014; Lund et al., 2018). Figure [17-14](#) shows the NICAM-simulated vertical BC profiles and the measured vertical BC profiles from various missions in different regions: ~~by~~ flights in HIPPO for annual averages over the Pacific, ~~by~~ ARCTAS in spring and summer over the Arctic region where CALIOP does not generally detect aerosol signals, and ~~by~~ A-FORCE in spring over East Asia where anthropogenic BC is likely transported to the Arctic (and which can be an important source of BC over the Arctic) (e.g., Ikeda et al., 2017). The NICAM-simulated BC vertical profiles are generally comparable to those observed by [the](#) flights and generally closer to the observations than other global models (Koch et al., 2009; Samset et al., 2014; Matsui and Mahowald, 2017; Kaiser et al., 2019; Tegan et al., 2019). Over the majority of the Pacific Ocean (60°S-60°N, 160°E-150°W), the NICAM-simulated BC concentrations show ~~as~~ annual averages below a height of 3 km (approximately 700 hPa) in Figure [17-14](#) (a) to (c) [that](#) are generally within the uncertainties obtained from the variability of the measurements, whereas the differences in the BC concentrations between the HRM and LRM are very small. Above approximately 700 hPa, however, the differences between the HRM and LRM become large, which is consistent with the results of the comparison with

CALIOP in Figure 4613. Moreover, because the LRM-simulated BC concentrations are lower than those in the HRM, those in the LRM are closer to the observations than those in the HRM. As already mentioned in Table 2 in section 3.2, the differences in the BC concentrations between the HRM and LRM are caused by differences in the BC lifetime, especially for WIBC. In addition, the HRM-simulated BC concentrations and even the LRM-simulated BC concentrations around the equator (20°S-20°N) are overestimated compared to the measurements, which has been noted by previous studies as one of the current problems among global aerosol models (e.g., Koch et al., 2009; Samset et al., 2014; Schwarz et al., 2017). The reason for this overestimation is possibly the overestimation of the BC atmospheric lifetime, which must be smaller than 5 days (Lund et al., 2018) but larger than 5 days in the HRM and other global models (Table 2). The overestimation of the BC lifetime may be attributed to the underestimation of the wet deposition of WIBC in the HRM, overestimation of the convective mass flux above 500 hPa, which may be improved by increasing the number of vertical layers in the model (Allen and Landuyt, 2014), ~~Another possibility is~~ possible overestimation of the climatological BC emission from biomass burning (Figure S1), and a lack of secondary aerosol activation by convective clouds and associated removal by precipitation (Yu et al., 2019).

Over the Southern Ocean (60°S-80°S, 160°E-150°W), where ~~the~~ aerosols are transported from other areas, the observed BC concentrations are 10-50 ng kg<sup>-1</sup> near the surface and more than 1 ng kg<sup>-1</sup> at approximately 300 hPa. The surface BC concentrations are much lower than those in other areas, but those at 300 hPa are comparable to those in HIPPO-P2 (20°N-60°N) and HIPPO-P4 (60°S-20°S) and higher than those in HIPPO-P3 (20°S-20°N). These features of the observations are generally reproduced by the NICAM simulations, but the simulated BC concentrations tend to be overestimated compared to the measurements. Although previous studies have offered only a limited discussion of BC transport to the Antarctic, this overestimation may be caused by the underestimation of BC wet deposition and possibly the overestimation of the horizontal transport of simulated BC to the Antarctic.

As discussed in section 4.2, both the HRM and the LRM successfully reproduce the aerosols over the Arctic. In Figure 4714 (e), (g) and (h), where the vertical BC profiles over the Arctic region (>60°N) are shown, the NICAM-simulated BC concentrations near the surface are generally comparable to the measurements, except for the July-August average in panel (g). The observed BC concentrations in July-August seem to be inconsistent with the results in Figure 4512, where ~~the~~ BC

over the Arctic reaches a maximum concentration in spring (February-April) and a minimum in summer (June-October). This may be caused by specific smoke plumes during the observation period (Liu et al., 2011; Allen and Landuyt, 2014); however, these disturbances are not considered in our simulations ~~since~~because climatological emission fluxes are employed in this study. ~~Actually~~In fact, intensive biomass burning was observed in Russia and North America in the target year (2008) of the measurement period compared to the climatological years (Yasunari et al., 2018). In addition, the simulated BC concentrations in July-August are underestimated not only at the surface but also at all heights compared to the ARCTAS-B flight measurements. In the annual averages shown in panel (e), the simulated BC concentrations generally match the measurements, but above approximately 300 hPa, both the HRM and ~~the~~-LRM overestimate the BC concentrations, which is also the case in other regions (panels (a)-(d) in Figure ~~4714~~). In spring (March-April) over the Arctic, both the HRM-simulated and ~~the~~-LRM-simulated BC concentrations are generally comparable to the measurements, even those obtained by the field campaign flights (Figure ~~4714~~(g)). In the main source regions of Arctic BC, i.e., East Asia, both the HRM-simulated and the LRM-simulated BC concentrations exhibit better agreement in the measurements (Figure ~~4714~~(f)). In the middle troposphere (approximately 400-800 hPa) over the Arctic, however, both the HRM-simulated and ~~the~~-LRM-simulated BC concentrations are underestimated compared to the ARCTAS-A measurements. These findings may suggest that the HRM with O(10-km) grid spacing cannot resolve ~~the~~ lifting process of aerosols ~~at~~along the Arctic front as pointed out by Quinn et al. (2011). Even when a source-receptor analysis of BC concentrations is used to identify the sources, the results remain highly uncertain, and no clear conclusions have been reached among previous studies. For example, Ikeda et al. (2017) employed the GEOS-Chem model and concluded that BC is mainly contributed by East Asian anthropogenic sources, whereas Matsui et al. (2011) used backward trajectories with both ARCTAS measurements and Weather Research and Forecasting (WRF) simulations and concluded that ~~the~~-BC over the Arctic is mainly contributed by biomass burning from Russia, North America and Europe. The differences between these models and measurements can be partly caused by a sampling problem without using exact grids and periods (Schutgens et al., 2016). In conclusion, a high-resolution grid system resolves one of the major issues regarding the distribution of BC, namely, the overestimation in the upper troposphere over the Pacific Ocean, but it does not solve the issue of its underestimation in the middle to upper troposphere over the Arctic.

#### 4.4 Aerosol radiative forcing (ARF)

ARFs, which are complicated by various aerosol parameters, are the most important factors for estimating the impacts of aerosols on climate. Figure 18-15 shows the global and annual average ARFs due to the direct and indirect effects of anthropogenic and all aerosols, i.e.,  $IRF_{\text{Fari}}$ ,  $ERF_{\text{Fari}}$ , and  $ERF_{\text{Faci}}$ , under all-sky and clear-sky conditions. The values of the  $ERF_{\text{Fari}}$  direct ARFs due to anthropogenic aerosols under all-sky conditions with uncertainties, which represent global confidence intervals with a significance threshold of 95%, are estimated to be  $-0.293 \pm 0.001$  to  $-0.29$   $W_m^{-2}$  (HRM) and  $-0.239 \pm 0.002$  to  $-0.24$   $W_m^{-2}$  (LRM), which are within the AeroCom estimates (from  $-0.58$   $W_m^{-2}$  to  $-0.02$   $W_m^{-2}$  with a mean of  $-0.20$   $W_m^{-2}$  and a standard deviation of  $0.15$   $W_m^{-2}$  by Myhre et al., 2013) but slightly smaller than the estimation by the Max Planck Aerosol Climatology version 2 (MACv2) ( $-0.35$   $W_m^{-2}$ ) by Kinne (2019). Under clear-sky conditions, the values of the  $ERF_{\text{Fari}}$  direct ARFs due to anthropogenic aerosols are estimated to be  $-0.57$  to  $-0.567 \pm 0.001$   $W_m^{-2}$  (HRM) and  $-0.48$  to  $-0.479 \pm 0.004$   $W_m^{-2}$  (LRM), which are also within the AeroCom estimates (from  $-1.01$   $W_m^{-2}$  to  $-0.35$   $W_m^{-2}$  with a mean of  $-0.71$   $W_m^{-2}$  and a standard deviation of  $0.18$   $W_m^{-2}$  by Myhre et al., 2013) but smaller than the MACv2 estimate ( $-0.69$   $W_m^{-2}$ ) by Kinne (2019). The differences in the  $ERF_{\text{Fari}}$  ARFs values between the HRM and LRM under both all- and clear-sky conditions are within  $0.1$   $W_m^{-2}$ , which is smaller than the standard deviation among the AeroCom models. The uncertainty of the HRM is smaller than that of the LRM because the number of samplings is 16 times higher (due to different number of grids). The values of  $IRF_{\text{Fari}}$  direct ARFs due to all aerosols, i.e., anthropogenic and natural aerosols, under all-sky conditions are estimated to be  $-1.80$  to  $-1.791 \pm 0.002$   $W_m^{-2}$  (HRM) and  $-1.70$  to  $-1.697 \pm 0.010$   $W_m^{-2}$  (LRM). For only shortwave fluxes, the  $IRF_{\text{Fari}}$  values ARFs are estimated to be  $-2.03$  to  $-2.019 \pm 0.003$   $W_m^{-2}$  (HRM) and  $-1.93$  to  $-1.927 \pm 0.011$   $W_m^{-2}$  (LRM), which are comparable to the measurement-based estimates using CALIOP (Oikawa et al., 2018) and MACv2 (Kinne, 2019) within approximately  $0.2$   $W_m^{-2}$  but smaller than the assimilated estimate of  $-3.1$   $W_m^{-2}$  (Su et al., 2013). Table 3 shows the TOA and surface components of the  $IRF_{\text{Fari}}$  ARFs under all-sky and clear-sky conditions. First, the largest difference in the TOA  $IRF_{\text{Fari}}$  ARF between the HRM and LRM under all-sky conditions is found for sulfate ( $-0.06$  to  $-0.048$   $W_m^{-2}$ ), whereas the differences in the other components between the HRM and LRM are within  $0.020$   $W_m^{-2}$ . This is also consistent with the differences in the AOT and column burden shown in Figures 8-S7 and 97. Second, the largest difference in the surface  $IRF_{\text{Fari}}$  ARF between the HRM and LRM under all-sky conditions is found for WIBC ( $-0.0617$   $W_m^{-2}$ ), whereas that in

the TOA ~~IRFari ARF~~ is only  $0.020 \text{ WmW m}^{-2}$ . Under clear-sky condition, the largest difference in the ~~RFari ARF~~ for WIBC is ~~approximately  $-0.004 \text{ WmW m}^{-2}$~~  at the TOA and  ~~$-0.08-074 \text{ WmW m}^{-2}$~~  at the surface. The differences in the ~~IRFari ARF~~ at the surface are consistent with those in the column burden of WIBC; thus, these differences between the TOA and surface can be explained by the stratification of WIBC and clouds (e.g., Haywood and Shine, 1997). Although the differences in the

5 ~~IRFari ARF~~ due to BC between the HRM and LRM are found, both the HRM and LRM estimated a positive ~~IRFari ARF~~ due to the WIBC and even the WSBC seems to be underestimated compared to the observation-based studies by Oikawa et al. (2018) and Kinne (2019). This is supported by the fact that the differences in the ~~IRFari ARF~~ between all-sky and clear-sky conditions are lower than those by Oikawa et al. (2018) and Kinne (2019), ~~which is~~ probably because the light-absorption ~~amount~~ of carbonaceous aerosols ~~under the cloudy condition~~ is underestimated due to the underestimation of

10 cloud ~~scatterings~~. Third, the ~~values of the~~ shortwave ~~IRFari ARFs~~ due to all aerosols at the surface under all-sky conditions are estimated to be  ~~$-3.37330 \pm 0.005 \text{ WmW m}^{-2}$~~  (HRM) and  ~~$-3.272 \pm 0.022 \text{ WmW m}^{-2}$~~  (LRM), the absolute values of which are smaller than those in previous studies based on satellites ( ~~$-4.23 \text{ WmW m}^{-2}$~~  to  ~~$-7.79 \text{ WmW m}^{-2}$~~ , summarized by Korras-Carraca et al., 2019) and the MACv2 estimate ( ~~$-4.0 \text{ WmW m}^{-2}$~~ ) by Kinne (2019). This is probably because the dust shortwave ~~IRFari values ARFs~~ in both the HRM and ~~the~~ LRM have ~~the largest~~ negative values among the aerosol species

15 due to the overestimation of the single scattering albedo (SSA) over desert areas (0.96-0.97 in this study) ~~compared to~~ ~~than~~ ~~those in~~ other studies based on AERONET retrievals (0.92 in Giles et al., 2012). Another reason is the underestimation of ground surface albedo, which is a tendency of the NICAM, and our previous study (Dai et al., 2018) also showed negative ~~IRFari ARF~~ values even over ~~the~~ desert areas. Fourth, the ~~IRFari ARF~~ due to sea salt under all-sky conditions is estimated to be ~~approximately  $-0.474 \pm 0.0008 \text{ WmW m}^{-2}$~~  (in both the HRM and ~~the~~ LRM), which is comparable to the values reported in

20 previous studies ( ~~$-0.21 \text{ WmW m}^{-2}$~~  to  ~~$-2.21 \text{ WmW m}^{-2}$~~  in Partanen et al., 2014;  ~~$-0.31 \text{ WmW m}^{-2}$~~  in Takemura et al., 2002;  ~~$-0.55 \text{ WmW m}^{-2}$~~  in Jacobson, 2001), even though the simulated AOTs over the oceans tend to be larger than the satellite results. Again, this gap in the ~~IRFari ARFs~~ between the model-based and observation-based estimates cannot be solved by using a finer grid resolution in global models.

By ~~u~~Using ~~a the~~ method proposed by Ghan (2013), the ~~values of the ERFaci ARFs~~ due to the anthropogenic ~~IARF aerosols~~

25 are estimated to be  ~~$-0.93-919 \pm 0.004 \text{ WmW m}^{-2}$~~  (HRM) and  ~~$-1.101 \pm 0.013 \text{ WmW m}^{-2}$~~  (LRM). These values are comparable to

those in another study ( $-1.06 \text{ Wm}^{-2}$ ) by Jing and Suzuki (2018) and slightly larger than the values published in the Fifth Assessment Report by the Intergovernmental Panel on Climate Change (IPCC-AR5) ( $-0.45 \text{ Wm}^{-2}$  with a 90% uncertainty range from  $0 \text{ Wm}^{-2}$  to  $-1.2 \text{ Wm}^{-2}$ ), albeit within uncertainty. However, it should be noted that our estimates are still uncertain. First, this is because the biomass burning emissions in this study are assumed to be zero during the preindustrial era. Second, the minimum CCN value in this study is set at  $25 \text{ cm}^{-3}$ , which strongly affects the ~~ERF<sub>aci</sub>ARF due to the IARF~~ (Hoose et al., 2009). Third, the ~~meteorological-interannual~~ variability among different years can influence the results, as discussed in section 4.5. Furthermore, the magnitude of the difference between the HRM and LRM is estimated to be  $0.179 \text{ Wm}^{-2}$ , which is larger than that of the ~~IRF<sub>ari</sub>ARF due to the aerosol direct effect~~. The HRM-simulated ~~ERF<sub>aci</sub> IARF~~ is generally lower than the LRM-simulated ~~ERF<sub>aci</sub>ARF~~, which is partly explained by the following: the HRM-simulated CCN concentrations are larger than the LRM-simulated CCN concentrations (Figure 1411), and the ~~ERF<sub>aci</sub> IARF~~ generally becomes smaller as the aerosol concentrations become larger (e.g., Carslaw et al., 2013). In the total effect, because some of the ~~ERF<sub>ari</sub> and ERF<sub>aci</sub> ARFs are canceled~~ out, the difference due to both ~~ARIs and ACIs direct and indirect effects~~ attributable to ~~direct~~ forcing in the HRM is calculated to be  $-0.11-125 \text{ Wm}^{-2}$ .

#### 4.5 ~~Uncertainties caused by Interannual variability~~ meteorological fields

The ~~interannual~~ variabilities of aerosols ~~for 3 years caused by the meteorological fields~~ are discussed and quantified by comparing the differences ~~in the aerosols~~ between the HRM and LRM. Figure 19-16 shows the ~~global annual averages for the relevant parameters (magnitudes of the differences in the~~ emission fluxes for dust and sea salt, column aerosol burdens, the AOT, and ~~the direct ARF<sub>ari</sub> at the TOA) between using~~ the HRM and LRM ~~results or between the 3-year integrations in the HRM and LRM. The annual averages include 3-year averages as well as 1-year averages in both the HRM and LRM to~~ realize whether the differences between the HRM and LRM are greater or less than the maximum and the minimum difference between each 1-year average of the 3 years. In Figure 16(b) ~~For the emitted sea salt~~, for example, the difference ~~in the 3-year averages of the emission flux for sea salt~~ between the HRM and LRM is estimated to be ~~approximately 900911~~  $\text{Tg yr}^{-1}$ , which is much larger than the difference in the ~~interannual~~ variability ~~in both the HRM and LRM of the 3-year meteorological fields~~ (the maximum and the minimum difference is ~~approximately 160455~~  $\text{Tg yr}^{-1}$  for the HRM and



~~approximately 240241~~ Tg yr<sup>-1</sup> for the LRM, ~~respectively~~). Therefore, the impact of the horizontal grid size on sea salt emissions is larger than that caused by ~~interannual meteorological~~-variability ~~of the meteorological fields (mainly wind at a height of 10 m)~~ over 3 years. In contrast, ~~in Figure 16(a)~~ the difference in ~~the 3-year averages of the emission flux for emitted dust~~ between the ~~HRM and LRM different horizontal resolutions~~ is ~~within smaller than~~ the ~~range maximum and the~~  
5 ~~minimum of the~~ difference ~~between each 1-year average of the 3 years~~ caused by ~~meteorological-interannual~~ variabilities over 3 years in the HRM and LRM. These may be explained by ~~interannual variabilities differences~~ in the simulated winds, which are strongly affected by the simulated surface temperature; the SST is fixed, but the temperature over land is a diagnostic variable. Therefore, the differences in the column burden and AOT for dust ~~between the HRM and LRM~~ are ~~smaller than within the range of the differences interannual caused by meteorological~~-variabilities. The difference in the  
10 column burden for sea salt is slightly larger than that for dust, but the difference in the AOT for sea salt is ~~within the range of~~ ~~smaller than~~ the ~~interannual difference caused by meteorological~~-variabilities ~~over 3 years~~. ~~In Figures 16(e) and 16(k), the~~ ~~The~~ differences in ~~the 3-year averages of~~ the column burden and AOT for sulfate between the HRM and LRM are larger than ~~interannual those caused by meteorological~~-variabilities, indicating that the difference in the clouds ~~and precipitation~~ between the different horizontal grid spacings (14 km versus 56 km) is larger than that among the ~~interannual meteorological~~  
15 variabilities with the same horizontal grid spacings. This conclusion is also applicable to the carbonaceous parameters, ~~but the difference in the AOT for carbon between the HRM and LRM is comparable to that among the meteorological variabilities in the HRM (Figure 16(l))~~. As a result, ~~because the contribution of dust and seasalt to the total AOT is larger than that of sulfate and carbonaceous aerosols,~~ the difference in ~~the 3-year averages of the total~~ AOT between the HRM and LRM is smaller than that among the ~~interannual meteorological~~-variabilities ~~(Figure 16(m))~~. For the ~~DARFRFari~~, the  
20 differences in ~~the 3-year averages of the shortwave and total (shortwave plus longwave) ARFs-RFari~~ under ~~both all-sky~~ conditions between the HRM and LRM are ~~slightly~~ larger than those among the ~~interannual meteorological~~-variabilities ~~in the HRM and LRM (Figures 16(n) and 16(r))~~, whereas the differences in the longwave or shortwave ~~IDARFs-RFari~~ under ~~cloudy-clear-sky~~ conditions, which are strongly related to ~~cloudsdust~~, are generally smaller than those among the ~~interannual meteorological~~-variabilities ~~in the HRM and LRM~~. ~~This suggests that the clouds are also significantly modulated by the~~  
25 ~~interannual variabilities, affecting the dust-induced changes in IRFari and diminishing changes in appearance. In summary,~~

the interannual variability is mainly present in the winds over land and RH, which cause relatively larger variabilities in dust (emission flux, column burden and AOT) and sea salt (mainly AOT). As a result, the total AOT and IRFari under clear-sky conditions and for longwave are more influenced by the interannual variabilities than those by the horizontal resolution. However, the other relevant parameters shown in Figure 16, i.e., the sea salt emission flux, column burdens for sulfate and carbon, including POM and BC, and total RFari under all-sky conditions, are influenced by the horizontal resolution. Therefore, and discussions of the impacts of different horizontal grid spacings on these parameters total AOT and DARE under cloudy conditions or for longwave ARFs are can be difficult to facilitate using only a 1-year integration.

## 5 Summary

10 What is the advantage of an *actual* HRM with aerosols? To address this question, we developed a global aerosol transport model ~~on using~~ NICAM.16 with a 14-km horizontal grid spacing. Previous studies have spent considerable amounts of resources to find the answer, but almost all of these studies were limited in terms of the domain (regional or urban scale) and period (several days to 1 month). Although previous studies have focused on the global scale, the horizontal grid spacing ~~was has been~~ still coarse, i.e., more than 50 km. In this study, we execute a global cloud-system resolving model, NICAM, 15 coupled to aerosol components with a 14-km grid spacing and evaluate the simulated aerosol distributions, their budgets and their interactions with clouds against multiple measurements and other models. For comparison, we also execute the NICAM simulations with a 56-km grid spacing as an LRM, which still boasts a high resolution among the current global aerosol climate models, but coarser than some of those used for operational global aerosol forecasting (Sessions et al., 2015). The integration time is 3 years, which is very long with such an HRM. ~~Therefore, this work represents a very pioneering study.~~

20 The relevant variables, i.e., wind, clouds and precipitation, that strongly determine the aerosol distributions are evaluated using reanalysis data, satellite and in situ measurements. The differences in the global and annual averages between the HRM and LRM are generally within 10%, and both differences generally range within the uncertainties of the measurements and other global models. Our specific conclusions are described below.

- We expected the HRM-simulated wind speeds to be higher than the LRM-simulated wind speeds, but this is not always the case.

5 - The HRM-simulated ~~precipitation clouds (cloud fraction and cloud optical thickness) are~~ smaller than that simulated by the LRM-simulated clouds because the LRM tends to reproduce unrealistically strong convective clouds compared to the HRM. Such convective clouds can provide strong precipitation due to the coarseness of the horizontal grid spacing. ~~However, the~~ warm-topped clouds-COTs simulated by the HRM are also smaller than and the LRM results, but both simulated results are not underestimated compared to the MODIS retrievals. In contrast, the HRM-simulated CF for all types of clouds is larger than the LRM-simulated results and closer to the MODIS retrievals.

10 - The HRM-simulated RPCW, which is very important for determining the aerosol wet removal rate, is smaller than that simulated by the LRM by approximately 20%, which means that the LRM-simulated aerosols are more quickly scavenged by precipitation than the HRM-simulated aerosols.

15 - Both the HRM-simulated and ~~the~~ LRM-simulated TOA shortwave radiative fluxes are closer to the satellite measurements by CERES than are the results of a previous study using NICAM simulations with a 14-km grid spacing but without aerosol components (Kodama et al., 2015). The bias is less than  $8 \text{ W m}^{-2}$ , which is within the uncertainty among global models. However, the LRM reproduces the CERES-estimated radiative fluxes better than the HRM due to the larger clouds in the LRM.

20 - At the surface, the BSRN-observed ~~global radiation fluxes~~ SSR are sufficiently reproduced by both the HRM and ~~the~~ LRM (PCC=0.9, NMB<1%, RMSE=-32  $\text{W m}^{-2}$ ), although diffuse and direct radiation fluxes have higher biases and uncertainties (reaching up to 30% of for the NMB).

The conclusions for the simulated aerosol evaluations are described below.

25 - Both the HRM-simulated and ~~the~~ LRM-simulated AOTs are generally close to the MODIS-retrieved AOTs with PCC>0.47, RMSE= $\leq 0.15-14$  and NMB<10% in global averages. A comparison using in situ measurements shows that the HRM-simulated AOTs are slightly closer to the measurements than are the LRM-simulated AOTs, as the former have a higher correlation (PCC=0.47), lower uncertainty (RMSE=0.21) and lower bias (-20%).

- The analysis of the chemical components ~~for~~of the AOTs and column burdens shows that the largest difference in the AOTs between the HRM and LRM is found for sulfate (15.7%), followed by all carbonaceous aerosols (5.2%). Large differences in the column burden are found for sulfate (11.3%), WIBC (32.1%), POM (9.9%) and WSBC (10.4%). Differences in sulfate and WIBC occur over a large area.

5 - The global budgets of aerosol species in both the HRM and ~~the~~LRM generally range within those obtained from other global models, except for the atmospheric lifetime of sulfate, whose lifetime is estimated to be 2.4 days (HRM) and 2.1 days (LRM),~~respectively~~, whereas it ranges from 3.3 days to 4.9 days in other global models. This tendency is also found for sea salt, whose lifetime is 0.23 days (HRM) and 0.21 days (LRM), whereas it ranges from 0.2 days to 1.0 day in other global models. Between the HRM and LRM, some remarkable differences in the wet deposition flux of sea salt and the lifetime of BC of more than 20% are observed. These results suggest that aerosol-cloud-precipitation interactions through wet deposition are modified in the models with different horizontal resolutions ~~and the HRM will provide better results~~.

10

- The simulated surface aerosols for fine-mode particles, such as sulfate, POM and BC, are generally in agreement with the measurements, except in China, where the simulated results are underestimated. This suggests that the emission inventory in China is underestimated or the 14-km grid spacing is not sufficient to resolve such high concentrations in highly dense urban areas.

15

- The simulated surface aerosols for dust are generally in agreement in the measurements but not for sea salt. This is probably because the slight bias in the wind causes considerable bias in the sea salt emission flux; ~~i.e.~~, the 1.5 m s<sup>-1</sup> difference in the wind speed at a height of 10 m provides a 4-fold difference in the sea salt emission flux.

20

The verification of the relevant variables suggests that both the HRM and ~~the~~LRM can be applicable for a current global ~~climate~~ aerosol climate model. However, several important differences between the HRM and LRM have not been addressed in detail; therefore, section 4 discusses the following six issues to clarify the remaining issues relative to the LRM.

#### **What is the impact of the high-resolution grid on the coarse-grid average used in global aerosol models (section 4.1)?**

25

At the polluted relevant sites during polluted months, the ~~variabilities~~ differences in the simulated aerosol concentrations between the HRM and LRM are estimated with NMBs of -23.19% (-63% to -2.5%) for surface BC, -4.5% (-9.1% to +1.8%) for

surface sulfate and ~~+3%~~ (-49% to +223%) for AOT. On a global scale, the variabilities in the AOT are calculated to be 28.5% (HRM) and 16.6% (LRM); ~~i.e.~~ the ratio between the HRM and LRM is 1.7. For CCN, COT and precipitation, the ratios are calculated to be 1.9, 3.5 and 2.8, respectively. This clearly shows how the HRM reproduces such variability in relation to extreme weather phenomena.

5 **What is the impact of the high-resolution grid on the ~~reproductivity~~ reproducibility of BC and sulfate over the Arctic (section 4.2)?**

Unlike previous global models and our model with a lower grid spacing and a cloud macrophysics module, both the HRM and ~~the~~ LRM succeed in reproducing the observed BC and sulfate over the Arctic. Between the HRM and LRM, the difference in the BC concentration reaches 30% in spring, and the HRM results are better than the LRM results. Our

10 sensitivity experiments show the importance of considering cloud microphysics processes, including prognostic precipitation, which is one of the processes related to the wet deposition of aerosols, as suggested by previous studies.

**What is the impact of the high-resolution grid on the vertical distribution of aerosols (section 4.3)?**

The differences in the column burdens influence sulfate and carbonaceous aerosols, but the corresponding changes in the vertical distribution are not discussed in section 3. Using CALIOP/CALIPSO satellite observations, both the HRM and ~~the~~

15 LRM generally reproduce the vertical profiles of the CALIOP-retrieved aerosol extinction coefficients worldwide. The issue regarding the overestimation of aerosols in the ~~mid-dle~~ troposphere among the current global aerosol models is not found extensively in this study. However, the use of a high-resolution grid does not resolve one of the major issues pertaining to the BC distribution ~~—~~ the underestimation in the ~~middle-mid-~~ to upper troposphere over the Arctic. In the ~~middle-mid-~~ and upper troposphere, especially above 3 km, the HRM-simulated aerosol concentrations tend to be higher than the LRM-

20 simulated concentrations, and the HRM results are overestimated compared to the CALIOP measurements. The analysis of the column burden indicates that this difference is caused by WIBC and sulfate. This and the finding that the differences in the vertical profiles over dusty regions are very small suggest that wet deposition processes rather than the transport characteristics cause the differences in the vertical profiles between the HRM and LRM. This is also suggested by the validation of the vertical BC profile, which shows better performance of the LRM, whose lifetime of BC (4.97 days) is

smaller than that in the HRM (6.37 days) and closer to the reference value (less than 5 days) from previous studies (Lund et al., 2018).

**How are the ARFs modified ~~by~~ using the HRM (section 4.4)?**

5 The ARFs, i.e., IRFari, ERFari and ERFaci, estimated from both the HRM and ~~the~~ LRM are within the uncertainties obtained from the observations and other global models. The largest difference in the IARFs-RFari between the HRM and LRM is  $0.05 \text{ Wm}^2$  at TOA for sulfate and  $0.067 \text{ Wm}^2$  at the surface for WIBC. ~~Even A~~ though the differences in the IARF-RFari due to BC between the HRM and LRM are found, both the HRM and LRM estimated positive IARF-RFari due to WIBC and even WSBC seems to be underestimated, compared to the observation-based studies by Oikawa et al. (2018) and Kinne (2019). Both the HRM-estimated and ~~the~~ LRM-estimated IARFs-RFari values due to dust are negatively more larger negative than those in other models because of the overestimation of the SSA and the underestimation of the surface albedo over desert areas. The ~~negatively~~ large negative dust-related IARF-RFari is responsible for the underestimation of the surface IARF-RFari compared to the satellite results. For the ARF-ERFaci due to anthropogenic aerosol ~~indirect forcing (i.e., the IARF)s~~, the difference between the HRM and LRM is  $0.17-18 \text{ Wm}^2$ , which is larger than that obtained for the ~~direct aerosol forcing~~ ERFari. This study indicates that a higher-resolution model provides a lower ERFaci-IARF that is closer to the reference value shown in the IPCC-AR5. However, it should be noted that several important assumptions used in this study can affect the ERFaci-IARF values, so this process must be further developed and refined to properly estimate the ERFaci-IARF.

**Is the difference between the HRM and LRM larger than the interannual variability ~~among the different meteorological fields~~ obtained by the 3-year integration (section 4.5)?**

20 The interannual variability is mainly reflect in the winds over land and RH, which cause relatively larger variabilities in dust (emission flux, column burden and AOT) and sea salt (mainly AOT). As a result, the total AOT and IRFari under clear-sky conditions and for longwave are more influenced by the interannual variabilities than those by the horizontal resolution. This suggests that the clouds are also significantly modulated by the interannual variabilities rather than the horizontal resolution. However, the results related to sulfate, POM and BC ~~relevant variables, i.e., the sea salt emission flux, column burdens for~~ sulfate and carbon, including POM and BC, and total DAREF, are strongly influenced by the horizontal resolution compared

to the interannual variability, and discussions of the impacts of different horizontal grid spacings on these parameters can be facilitated using only a 1-year integration.

~~, but the others, i.e., the dust emission fluxes, AOT, and longwave and shortwave DAREs under cloudy conditions, are strongly influenced by the variabilities caused by the meteorological fields.~~

- 5 Finally, the following question “How high is the calculation cost when using the HRM?” is considered. This answer is balanced by the precision of the aerosol simulation. As the computational cost is shown in Table S9 in the supplement ~~Actually~~, the computer resources required by the HRM are more than ten times higher (theoretically 16 times, but approximately 10 times using the K computer, which is a high-performance computing resource with relatively high memory performance) than that required by the LRM when using the same supercomputer with the same number of processors. When
- 10 focusing on extreme phenomena related to clouds and precipitation and ACIs, a 14-km grid spacing (or finer) is needed to clearly resolve the scientific questions addressed in this study. In this case, various tuning parameters associated with the aerosol distributions ~~are well tuned~~ using the LRM (56-km grid) can be directly applied to ~~for~~ the HRM (14-km grid) simulations, as we did in this study under the limitation of the available computational resources. In contrast, when focusing on the general circulations of aerosols and related gases, a 56-km grid spacing with a cloud microphysics module is sufficient,
- 15 and the results are generally similar to those with a 14-km grid spacing (with a difference of 10% on a global average), but apparent differences are found in aerosol wet deposition between the different resolutions. If the available computational resources greatly increase in the near future, we hope these suggestions will become helpful for all modelers.

### **Code and data availability**

- 20 The source codes of NICAM.16 can be obtained upon request under the general terms and conditions (<http://nicam.jp/hiki/?Research+Collaborations>). The data that support the findings of this study can be archived with DOI:10.5281/zenodo.3687323.

### Author contribution

DG designed and operated the numerical experiments and analyses. YS, HY and KS coordinated the model configuration and prepared the external conditions of the experiments. RK, EO, and TMN prepared the observational datasets for the model evaluation. TN submitted the proposal for the computational resources. DG wrote the initial draft of the paper, and all  
5 coauthors participated in discussions over the results and commented on the original manuscript.

### Competing interests

The authors declare that they have no conflicts of interest.

### Acknowledgements

10 We acknowledge the developers and administrators of [the](http://nicam.jp/) NICAM (<http://nicam.jp/>), SPRINTARS (<https://sprintars.riam.kyushu-u.ac.jp/indexe.html>), and MODIS (<https://modis.gsfc.nasa.gov/>) and the relevant PIs of the AERONET (<https://aeronet.gsfc.nasa.gov/>), SKYNET (<https://www.skynet-isdc.org/>) and CARSNET sites. We are grateful to the NCEP-FNL group, the NCEP/National Weather Service/National Oceanic Atmospheric Administration (NOAA)/U.S. Department of Commerce (2000), the NCEP FNL Operational Model Global Tropospheric Analyses (continuing from July  
15 1999), <https://doi.org/10.5065/D6M043C6>, and the NCAR Research Data Archive, Computational and Information Systems Laboratory, Boulder, Colo. (updated daily), last accessed 4 January 2020. The CERES datasets were obtained from the NASA LaRC Atmospheric Science Data Center. Some of the authors were supported by the Environment Research and Technology Development Fund (S-12) of the Environmental Restoration and Conservation Agency, Japan, and by JSPS KAKENHI grants (26740010, 15K17766, 17H04711, [and](#) 19H05669). Additionally, we were supported by the following  
20 projects: the Ministry of Environment (MOE)/GOSAT, the Japan Science and Technology (JST), CREST/EMS/TEEDDA, JAXA/EarthCARE, JAXA/GCOM-C, and NIES. The model simulations were performed using supercomputers: the [RIKEN/K](#) computer (hp160004, hp160231, hp170017, hp170232, hp180012, and hp180181), NIES/NEC SX-ACE and



JAXA/JSS2. We also acknowledge Drs. H. Matsui (Nagoya University), T. Seiki (JAMSTEC) and K. Ikeda (NIES) for their discussions and Profs. Y. Kondo (National Institute of Polar Research in Japan), M. Koike (University of Tokyo), and N. Moteki (University of Tokyo) and the NOAA Black Carbon Group for providing us with their aircraft BC measurements. Global maps in the figures are drawn using Grid Analysis and Display System (GrADS) (<http://cola.gmu.edu/grads/>).

5

## References

- Abdul-Razzak, H., and Ghan, S. J.: A parameterization of aerosol activation: 2 Multiple aerosol types, *J. Geophys. Res.*, 105, D5, 6837-6844, doi:10.1029/1999JD901161, 2000.
- Adler, R. F., Huffman, G. J., Chang, A., Ferraro, R., Xie, P., Janowiak, J., Rudolf, B., Schneider, U., Curtis, S., Bolvin, D., Gruber, A., Susskind, J., and Arkin, P.: The version 2 Global Precipitation Climatology Project (GPCP) monthly precipitation analysis 1979-present, *J. Hydrometeorol.*, 4, 1147-1167, doi:10.1175/1525-7541(2003)004<1147:TVGPCP>2.0.CO;2, 2003.
- Bates, T. S., Charlson, R. J., and Gammon, R. H.: Evidence for the climate role of marine biogenic sulphur, *Nature*, 329, 319–321, 1987.
- 15 Berry, E. X.: Cloud droplet growth by collection, *J. Atmos. Sci.*, 24, 688-701, 1967.
- Bond, T. C., Doherty, S. J., Fahey, D. W., Forster, P. M., Berntsen, T., DeAngelo, B. J., Flanner, M. G., Ghan, S., Kärcher, B., Koch, D., Kinne, S., Kondo, Y., Quinn, P. K., Sarofim, M. C., Schultz, M. G., Schulz, M., Venkataraman, C., Zhang, H., Zhang, S., Bellouin, N., Guttikunda, S. K., Hopke, P. K., Jacobson, M. Z., Kaiser, J. W., Klimont, Z., Lohmann, U., Schwarz, J. P., Shindell, D., Storelvmo, T., Warren, S. G., and Zender, C. S.: Bounding the role of black carbon in the climate system: A scientific assessment, *J. Geophys. Res.: Atmos.*, 118(11), 4173-4185, doi:10.1002/jgrd.50171, 2013.
- 20 Boutle, I. A., Abel, S. J., Hill, P. G., and Morcrette, C. J.: Spatial variability of liquid cloud and rain: observations and microphysical effects, *Q. J. R. Meteorol. Soc.*, 140, 583-594, doi:10.1002/qj.2140, 2014.

- Carslaw, K. S., Lee, L. A., Reddington, C. L., Pringle, K. J., Rap, A., Forster, P. M., Mann, G. W., Spracklen, D. V., Woodhouse, M. T., Regayre, L. A., and Pierce, J. R.: Large contribution of natural aerosols to uncertainty in direct forcing, *Nature*, 503, 67-71, doi:10.1038/nature12674, 2013.
- Che, H., Zhang, X.-Y., Xia, X., Goloub, P., Holben, B., Zhao, H., Wang, Y., Zhang, X.-C., Wang, H., Blarel, L., Damiri, B., Zhang, R., Deng, X., Ma, Y., Wang, T., Geng, F., Qi, B., Zhu, J., Yu, J., Chen, Q., and Shi, G.: Ground-based aerosol climatology of China: aerosol optical depths from the China Aerosol Remote Sensing Network (CARSNET) 2002–2013, *Atmos. Chem. Phys.*, 15, 7619–7652, doi:10.5194/acp-15-7619-2015, 2015.
- Chung, S. H., and Seinfeld, J. H.: Global distribution and climate forcing of carbonaceous aerosols, *J. Geophys. Res.*, 107(D19), 4407, doi:10.1029/2001JD001397, 2002.
- 10 Chikira, M., and Sugiyama, M.: A Cumulus Parameterization with State-Dependent Entrainment Rate. Part I: Description and Sensitivity to Temperature and Humidity Profiles, *J. Atmos. Sci.*, 67, 2171–2193, doi:10.1175/2010JAS3316.1, 2010.
- Dai, T., Goto, D., Schutgens, N. A. J., Dong, X., Shi, G., and Nakajima, T.: Simulated aerosol key optical properties over global scale using an aerosol transport model coupled with a new type of dynamic core, *Atmos. Environ.*, 82, 71-82, doi:10.1016/j.atmosenv.2013.10.018, 2014.
- 15 Dai, T., Cheng, Y., Zhang, P., Shi, G., Sekiguchi, M., Suzuki, K., Goto, D., and Nakajima, T.: Impacts of meteorological nudging on the global dust cycle simulated by NICAM coupled with an aerosol model, *Atmos. Environ.*, 190, 99-115, doi:10.1016/j.atmosenv.2018.07.016, 2018.
- Diehl, T., Heil, A., Chin, M., Pan, X., Streets, D., Schulz, M., and Kinne, S.: Anthropogenic, biomass burning, and volcano emissions of black carbon, organic carbon, and SO<sub>2</sub> from 1980 to 2010 for hindcast model experiments, *Atmos. Chem. Phys. Discuss.*, 12, 24895-24954, doi:10.5194/acpd-12-24895-2012, 2012.
- 20 Eckhardt, S., Quennehen, B., Olivie, D. J. L., Berntsen, T. K., Cherian, R., Christensen, J. H., Collins, W., Crepinsek, S., Daskalakis, N., Flanner, M., Herber, A., Heyes, C., Hodnebrog, Ø., Huang, L., Kanakidou, M., Klimont, Z., Langner, J., Law, K. S., Lund, M. T., Mahmood, R., Massling, A., Myriokefalitakis, S., Nielsen, I. E., Nøjgaard, J. K., Quaas, J., Quinn, P. K., Raut, J.-C., Rumbold, S. T., Schulz, M., Sharma, S., Skeie, R. B., Skov, H., Uttal, T., von Salzen, K., and
- 25

- Stohl, A.: Current model capabilities for simulating black carbon and sulfate concentrations in the Arctic atmosphere: a multi-model evaluation using a comprehensive measurement data set, *Atmos. Chem. Phys.*, 15, 9413–9433, doi:10.5194/acp-15-9413-2015, 2015.
- Ezzati, M., Lopez, A.D., Rodgers, A., Vander Hoorn, S., Murray, C.J., and Comparative Risk Assessment Collaborating Group: Selected major risk factors and global and regional burden of disease, *Lancet*, 360, 1347–1360. doi:10.1016/S0140-6736(02)11403-6, 2002.
- Galmarini, S., Kioutsioukis, I., Solazzo, E., Alyuz, U., Balzarini, A., Bellasio, R., Benedictow, A. M. K., Bianconi, R., Bieser, J., Brandt, J., Christensen, J. H., Colette, A., Curci, G., Davila, Y., Dong, X., Flemming, J., Francis, X., Fraser, A., Fu, J., Henze, D., Hogrefe, C., Im, U., Vivanco, M. G., Jimenez-Guerrero, P., Jonson, J. E., Kitwiroon, N., Manders, A., Mathur, R., Palacios-Pena, L., Pirovano, G., Pozzoli, L., Prank, M., Schultz, M., Sokhi, R. S., Sudo, K., Tuccella, P., Takemura, T., Sekiya, T., and Unal, A.: Two-scale multi-model ensemble: Is a hybrid ensemble of opportunity telling us more?, *Atmos. Chem. Phys.*, 18, 8727–8744, doi:10.5194/acp-18-8727-2018, 2018.
- Garrett, T. J., Brattström, S., Sharma, S., Worthy, D. E. J., Novelli, P.: The role of scavenging in the seasonal transport of black carbon and sulfate to the Arctic. *Geophys. Res. Lett.* 38, L16805, doi:10.1029/2011GL048221, 2011.
- Gelaro, R., Putman, W. M., Pawson, S., Draper, C., Molod, A., Norris, P. M., Ott, L., Privé, N., Reale, O., Achuthavariar, D., Bosilovich, M., Buchard, V., Chao, W., Coy, L., Cullather, R., Silva, A., Darnenov, A., and Errico, R. M.: Evaluation of the 7-km GEOS-5 Nature Run. Tech. Rep. NASA / TM – 2014-104606. NASA, 2015.
- Ghan, S.J.: Technical Note: Estimating aerosol effects on cloud radiative forcing, *Atmos. Chem. Phys.*, 13, 9971–9974, doi:10.5194/acp-13-9971-2013, 2013.
- Ghan, S. J., Leung, L. R., Easter, R. C., and Abdul-Razzak, A.: Prediction of cloud droplet number in a general circulation model, *J. Geophys. Res.*, 102, D18, 777–794, 1997.
- Giles, D. M., Holben B. N., Eck, T. F., Sinyuk, A., Smirnov, A., Slutsker, I., Dickerson, R. R., Thimpson, A. M., and Schafer, J. S.: An analysis of AERONET aerosol absorption properties and classifications representative of aerosol source regions, *J. Geophys. Res.*, 117, D17203, doi:10.1029/2012JD018127, 2012.

Goto, D., Takemura, T., and Nakajima, T.: Importance of global aerosol modeling including secondary organic aerosol formed from monoterpene, J. Geophys. Res., 113, D07205, doi:10.1029/2007JD009019, 2008.

- 5 Goto, D., Nakajima, T., Takemura, T., and Sudo, K.: A study of uncertainties in the sulfate distribution and its radiative forcing associated with sulfur chemistry in a global aerosol model, *Atmos. Chem. Phys.*, 11, 10889-10910, doi:10.5194/acp-11-10889-2011, 2011.
- Goto, D., Oshima, N., Nakajima, T., Takemura, T., and Ohara, T.: Impact of the aging process of black carbon aerosols on their spatial distribution, hygroscopicity, and radiative forcing in a global climate model, *Atmos. Chem. Phys. Discuss.*, 12, 29801-29849, doi:10.5194/acpd-12-29801-2012, 2012.
- 10 Goto, D., Dai, T., Satoh, M., Tomita, H., Uchida, J., Misawa, S., Inoue, T., Tsuruta, H., Ueda, K., Ng, C.F.S., Takami, A., Sugimoto, N., Shimizu, A., Ohara, T., and Nakajima, T.: Application of a global nonhydrostatic model with a stretched-grid system to regional aerosol simulations around Japan, *Geosci. Model Dev.*, 8, 235-259. Doi:10.5194/gmd-8-235-2015, 2015a.
- Goto D., Nakajima, T., Dai, T., Takemura, T., Kajino, M., Matsui, H., Takami, A., Hatakeyama, S., Sugimoto, N., Shimizu, A., and Ohara, T.: An evaluation of simulated particulate sulfate over East Asia through global model intercomparison, *J. Geophys. Res. Atmos.*, 120, 6247-6270, doi:10.1002/2014JD021693, 2015b.
- 15 Goto, D., Ueda, K., Ng, C.F.S., Takami, A., Ariga, T., Matsuhashi, K., and Nakajima, T.: Estimation of excess mortality due to long-term exposure to PM<sub>2.5</sub> in Japan using a high-resolution model for present and future scenarios. *Atmos. Environ.*, 140, 320-332. doi:10.1016/j.atmosenv.2016.06.015, 2016.
- Goto, D., Sato, Y., Yashiro, H. ~~&~~ and Suzuki, K.: Validation of high-resolution aerosol optical thickness simulated by a global non-hydrostatic model against remote sensing measurements. *AIP Conference Proceedings* 1810, 100002, 2017.
- 20 Goto D., Nakajima, T., Dai, T., Yashiro, H., Sato, Y., Suzuki, K., Uchida, J., Misawa, S., Yonemoto, R., Trieu, T.T.N., Tomita, H., and Satoh, M.: Multi-scale Simulations of Atmospheric Pollutants Using a Non-hydrostatic Icosahedral Atmospheric Model. In: Vadrevu K., Ohara T., Justice C. (eds) *Land-Atmospheric Research Applications in South and Southeast Asia*. Springer Remote Sensing/Photogrammetry. Springer, Cham, 2018

- Goto, D., Kikuchi, M., Suzuki, K., Hayasaki, M., Yoshida, M., Nagao, T. M., Choi, M., Kim, J., Sugimoto, N., Shimizu, A., Oikawa, E., and Nakajima, T.: Aerosol model evaluation using two geostationary satellites over East Asia in May 2016, *Atmos. Res.*, 217, 93-113, doi:10.1016/j.atmosres.2018.10.016, 2019.
- 5 [Grosvenor, D., and Wood, R.: The effect of solar zenith angle on MODIS cloud optical and microphysical retrievals within marine liquid water clouds, \*Atmos. Chem. Phys.\*, 14, 7291-7321. <https://dx.doi.org/10.5194/acp-14-7291-2014>, 2014.](#)
- Grythe, H., Ström, Krejci, R., Quinn, P., and Stohl, A.: A review of sea-spray aerosol source functions using a large global set of sea salt aerosol concentration measurements, *Atmos. Chem. Phys.*, 14, 1277-1297, doi:10.5194/acp-14-1277-2014, 2014.
- 10 Guenther, A., Hewitt, C. N., Erickson, D., Fall, R., Geron, C., Graedel, T., Harley, P., Klinger, L., Lerdau, M., McKay, W. A., Pierce, T., Scholes, B., Steinbrecher, R., Tallamraju, R., Taylor, J., and Zimmerman, P. A.: Global-Model of Natural Volatile Organic-Compound Emissions, *J. Geophys. Res.*, 100, 8873–8892, 1995.
- Hakuba, M. Z., Folini, D., Sanchez-Lorenzo, A., and Wild, M.: Spatial representativeness of ground-based solar radiation measurements, *J. Geophys. Res.*, 118, 8585-8597, doi:10.1002/jgrd.50673, 2013.
- Haywood, J. M., and Shine, K. P.: Multi-spectral calculations of the radiative forcing of tropospheric sulphate and soot aerosols using a column model, *Quart. J. R. Meteor. Soc.*, 123, 1907-1930, 1997.
- 15 [Hess, M., Koepke, P., and Schult, I.: Optical properties of aerosols and clouds: The software package OPAC, \*Bull. Am. Meteorol. Soc.\*, 79, 831–844, doi:10.1175/1520-0477\(1998\)079<0831:OPOAAC>2.0.CO;2, 1998.](#)
- Heintzenberg, J., Covert, D. C., and van Dingenen, R.: Size distribution and chemical composition of marine aerosols: a compilation and review, *Tellus*, 52B, 4, 1104-1122, 2000.
- 20 Holben, B. N., Eck, T. F., Slutsker, I., Tanré, D., Buis, J. P., Setzer, A., Vermote, E., Reagan, J. A., Kaufman, Y., Nakajima, T., Lavenu, F., Jankowiak, I., and Smirnov, A.: AERONET — A federated instrument network and data archive for aerosol characterization, *Rem. Sens. Environ.*, 66, 1-16, 1998.
- Hoose, C., Kristjánsson, J. E., Iversen, T., Kirkevåg, A., Seland, Ø., and Gettelman, A.: Constraining cloud droplet number concentrations in GCMs suppresses the aerosol indirect effect, *Geophys. Res. Lett.*, 36, L12807, doi:10.1029/2009GL038568, 2009.
- 25

- Hu, L., Keller, C. A., Long, M. S., Sherwen, T., Auer, B., Da Silva, A., Nielsen, J. E., Pawson, S., Thompson, M. A., Trayanov, A. L., Travis, K. R., Grange, S. K., Evans, M. J., and Jacob, D. J.: Global simulation of tropospheric chemistry at 12.5 km resolution: performance and evaluation of the GEOS-Chem chemical module (v10-1) within the NASA GEOS Earth system model (GEOS-5 ESM), *Geosci. Model Dev.*, 11, 4603-4620, doi:10.5194/gmd-11-4603-2018, 2018.
- 5
- Huang, L., Gong, S. L., Jia, C. Q., and Lavoué, D.: Importance of deposition processes in simulating the seasonality of the Arctic black carbon aerosol. *J. Geophys. Res.* 115, D17207, doi:10.1029/2009JD013478, 2010.
- Huneus, N., Schulz, M., Balkanski, Y., Griesfeller, J., Prospero, J., Kinne, S., Bauer, S., Boucher, O., Chin, M., Dentener, F., Diehl, T., Easter, R., Fillmore, D., Ghan, S., Ginoux, P., Grini, A., Horowitz, L., Koch, D., Krol, M. C., Landing, W., Liu, X., Mahowald, N., Miller, R., Morcrette, J.-J., Myhre, G., Penner, J., Perlwitz, J., Stier, P., Takemura, T., and Zender, C. S.: Global dust model intercomparison in AeroCom phase I, *Atmos. Chem. Phys.*, 11, 7781-7816, doi:10.5194/acp-11/7781-2011, 2011.
- 10
- Ikeda, K., Tanimoto, H., Sugita, T., Akiyoshi, H., Kanaya, Y., Zhu, C., and Taketani, F.: Tagged tracer simulations of black carbon in the Arctic: transport, source contributions, and budget. *Atmos. Chem. Phys.*, 17, 10515-10533, doi:10.5194/acp-17-10515-2017, 2017.
- 15
- Ishijima, K., Takigawa, M., Yamashita, Y., Yashiro, H., Kodama, C., Satoh, M., Tsuboi, K., Matsueda, H., Niwa, Y., and Hirao, S.: Analysis of High Radon-222 Concentration Events Using Multi-Horizontal-Resolution NICAM Simulations, *SOLA*, 14, 111-115, doi:10.2151/sola.2018-019, 2018
- Jacob, D. J., Crawford, J. H., Maring, H., Clarke, A. D., Dibb, J. E., Emmons, L. K., Ferrare, R. A., Hostetler, C. A., Russell, P. B., Singh, H. B., Thompson, A. M., Shaw, G. E., McCauley, E., Pederson, J. R., and Fisher, J. A.: The Arctic Research of the Composition of the Troposphere from Aircraft and Satellites (ARCTAS) mission: design, execution, and first results, *Atmos. Chem. Phys.*, 10, 5191-5212, doi:10.5194/acp-10-5191-2010, 2010.
- 20
- Jacobson, M. Z., Global direct radiative forcing due to multicomponent anthropogenic and natural aerosols, *J. Geophys. Res.*, 106, D2, 1551-1568, 2001.

- Janssens-Maenhout, G., Crippa, M., Guizzardi, D., Dentener, F., Muntean, M., Pouliot, G., Keating, T., Zhang, Q., Kurokawa, J., Wankmüller, R., Denier van der Gon, H., Kuenen, J. J. P., Klimont, Z., Frost, G., Darras, S., Koffi, B., and Li, M.: HTAP\_v2.2: a mosaic of regional and global emission grid maps for 2008 and 2010 to study hemispheric transport of air pollution, *Atmos. Chem. Phys.*, **15**, 11411–11432, 2015.
- 5 Jing, X.W., Suzuki, K., Guo, H., Goto, D., Ogura, T., Koshiro, T., and Mümlmenstädt, J.: A multi-model study on warm precipitation biases in global models compared to satellite observations, *J. Geophys. Res. Atmos.*, **122**, 11806–11824, doi:10.1002/2017JD027310, 2017.
- Jing, X., and K. Suzuki, 2018: The impact of process-based warm rain constraints on the aerosol indirect effect. *Geophys. Res. Lett.*, **45**, 10729–10737, doi:10.1029/2018GL079956.
- 10 Kalnay, E., Kanamitsu, M., Kistler, R., Collins, W., Deaven, D., Gandin, L., Iredell, M., Saha, S., White, G., Woollen, J., Zhu, Y., Chelliah, M., Ebisuzaki, W., Higgins, W., Janowiak, J., Mo, K. C., Ropelewski, C., Wang, J., Leetmaa, A., Reynolds, R., Jeene, R., and Joseph, D.: The NCEP/NCAR 40-year reanalysis project, *B. Am. Meteorol. Soc.*, **77**(3), 437–471 1996.
- Kim, D., Chin, M., Yu, H., Diehl, T., Tan, Q., Kahn, R. A., Tsigaridis, K., Bauer, S. E., Takemura, T., Pozzoli, L., Bellouin, N., Schulz, M., Peyridieu, S., Chédin, A., and Koffi, B.: Sources, sinks, and transatlantic transport of North African dust aerosol: A multimodel analysis and comparison with remote sensing data, *J. Geophys. Res. Atmos.*, **119**, 6259–6277, doi:10.1002/2013JD021099, 2014.
- 15 Kinne, S.: Aerosol radiative effects with MACv2, *Atmos. Chem. Phys.*, **19**, 10919–10959, doi:10.5194/acp-19-10919-2019.
- Kipling, Z., Stier, P., Johnson, C. E., Mann, G. W., Bellouin, N., Bauer, S. E., Bergman, T., Chin, M., Diehl, T., Ghan, S. J., Iversen, T., Kirkevåg, A., Kokkola, H., Liu, X., Luo, G., van Noije, T., Pringle, K. J., von Salzen, K., Schulz, M., Seland, Ø., Skeie, R. B., Takemura, T., Tsigaridis, K., and Zhang, K.: What controls the vertical distribution of aerosol? Relationships between process sensitivity in HadGEM3-UKCA and inter-model variation from AeroCom Phase II, *Atmos. Chem. Phys.*, **16**, 2221–2241, doi:10.5194/acp-16-2221-2016, 2016.
- 20 Koch, D., Schulz, M., Kinne, S., McNaughton, C., Spackman, J. R., Balkanski, Y., Bauer, S., Berntsen, T., Bond, T. C., Boucher, O., Chin, M., Clarke, A., De Luca, N., Dentener, F., Diehl, T., Dubovik, O., Easter, R., Fahey, D.,
- 25

- W., Feichter, J., Fillmore, D., Freitag, S., Ghan, S., Ginoux, P., Gong, S., Horowitz, L., Iversen, T., Kirkevåg, A., Klimont, Z., Kondo, Y., Krol, M., Liu, X., Miller, R., Montanaro, V., Moteki, N., Myhre, G., Penner, J. E., Perlwitz, J., Pitari, G., Reddy, S., Sahu, L., Sakamoto, H., Schuster, G., Schwarz, J. P., Seland, Ø., Stier, P., Takegawa, N., Takemura, T., Textor, C., van Aardenne, J. A., and Zhao, Y.: Evaluation of black carbon estimations in global aerosol models, *Atmos. Chem. Phys.*, 9, 9001-9026, doi:10.5194/acp-9-9001-2009, 2009.
- 5 Kodama, C., Yamada, Y., Noda, A. T., Kajikawa, Y., Nasuno, T., Yamaura, T., Takahashi, H. G., Hara, M., Kawatani, Y., Satoh, M., and Sugi, M.: A 20-year climatology of a NICAM AMIP-type simulation. *J. Meteorol. Soc. Japan. Ser. II* 93, 393-424, doi:10.2151/jmsj.2015-024, 2015.
- 10 [Kodama, C., Ohno, T., Seiki, T., Yashiro, H., Noda, A. T., Nakano, M., Yamada, Y., Roh, W., Satoh, M., Nitta, T., Goto, D., Miura, H., Nasuno, T., Miyakawa, T., Chen, Y.-W., and Sugi, M.: The non-hydrostatic global atmospheric model for CMIP6 HighResMIP simulations \(NICAM16-S\): Experimental design, model description, and sensitivity experiments. \*Geophys. Model Dev. Discuss.\*, <https://doi.org/10.5194/gmd-2019-369>, in review, 2020.](#)
- 15 Koffi, B., Schulz, M., Bréon, F. -M., Dentener, F., Steensen, B. M., Griesfeller, J., Winker, D., Balkanski, Y., Bauer, S. E., Chin, M., Diehl, T., Easter, R., Ghan, S., Hauglustaine, D. A., Iversen T., Kirkevåg, A., Liu, X., Lohmann, U., Myhre, G., Rasch, P., Seland, Ø., Skeie, R. B., Steenrod, S. D., Stier, P., Tackett, J., Takemura, T., Tsigaridis, K., Vuolo, M. R., Yoon, J., and Zhang, K.: Evaluation of the aerosol vertical distribution in global aerosol models through comparison against CALIOP measurements: AeroCom phase II results, *J. Geophys. Res. Atmos.*, 121, 7254-7283, doi:10.1002.2015JD024639, 2016.
- 20 Korras-Carraca, M. B., Pappas, V., Hatzianastassiou, N., Vardavas, I., and Matsoukas, C.: Global vertically resolved aerosol direct radiation effect from three years of CALIOP data using the FORTH radiation transfer model, *Atmos. Res.*, 224, 138-156, doi:10.1016/j.atmosres.2019.03.024, 2019.
- Lauer, A., and Hamilton, K.: Simulating clouds with global climate models: A comparison of CMIP5 results with CMIP3 and satellite data, *J. Clim.*, doi:10.1175/jcli-d-12-00451.1, 2013
- 25 Le Treut, H., and Li, Z.-X.: Sensitivity of an atmospheric general circulation model to prescribed SST changes: Feedback effects associated with the simulation of cloud optical properties, *Clim. Dym.*, 5, 175-187, 1991.



- [Lebock, M., and Su, J.: Application of active spaceborne remote sensing for understanding biases between passive cloud water path retrievals, \*J. Geophys. Res.: Atmospheres\* 119, 14, 8962-8979. <https://dx.doi.org/10.1002/2014jd021568>, 2014.](#)
- 5 [Levy, R. C., Mattoo, S., Munchak, L. A., Remer, L. A., Sayer, A. M., Patadia, F., and Hsu, N. C.: The Collection 6 MODIS aerosol products over land and ocean, \*Atmos. Meas. Tech.\*, 6, 2989-3034, doi:10.5194/amt-6-2989-2013, 2013.](#)
- Li, Z., Lau, W. K.-M., Ramanathan, V., Wu, G., Ding, Y., Manoj, M. G., Liu, J., Qian, Y., Li, J., Zhou, T., Fan, J., Rosenfeld, D., Ming, Y., Wang, Y., Huang, J., Wang, B., Xu, X., Lee, S. -S., Cribb, M., Zhang, F., Yang, X., Zhao, C., Takemura, T., Wang, K., Xia, X., Yin, Y., Zhang, H., Guo, J., Zhao, P. M., Sugimoto, N., Babu, S. S, and Brasseur, G. P.: Aerosol and monsoon climate interactions over Asia, *Rev. Geophys.*, 54, 866-929, doi:10.1002/2015RG00500, 2016
- 10 Lin, G., Qian, Y., Yan, H., Zhao, C., Ghan, S. J., Easter, R., and Zhang, K.: Quantification of marine aerosol subgrid variability and its correlation with clouds based on high-resolution regional modeling, *J. Geophys. Res. Atmos.*, 112, 6329-6346, doi:10.1002/2017JD026567, 2017.
- Liu, X., Penner, J. E., Das, B., Bergmann, D., Rodriguez, J. M., Strahan, S., Wang, M., and Feng, T.: Uncertainties in global aerosol simulations: Assessment using three meteorological data sets, *J. Geophys. Res.*, 112, D11212, doi:10.1029/2006JD008216, 2007.
- 15 Liu, J., Fan, S., Horowitz, L. W., and Levy II, H.: Evaluation of factors controlling long-range transport of black carbon to the Arctic. *J. Geophys. Res.*, 116, D04307, doi:10.1029/2010JD015145, 2011.
- Loeb, N. G., ~~B. A.~~ Wielicki, ~~B. A.~~, ~~D. R.~~ Doelling, ~~D. R.~~, ~~G. L.~~ Smith, ~~D. R.~~, ~~D. F.~~ Keyes, ~~D. F.~~, ~~S.~~ Kato, ~~S.~~, ~~N.~~ Manalo-Smith, ~~N.~~, ~~T.~~ and Wong, ~~T.~~: Toward optimal closure of the Earth's top-of-atmosphere radiation budget. *J. Clim.*, 22, 748-766, doi:10.1175/2008JCLI2637.1., 2009.
- 20 [Loeb, N. G., Wielicki, B. A., Wong, T., and Parker, P. A.: Impact of data gaps on satellite broadband radiation records, \*J. Geophys. Res.\*, 114, D11109, doi:10.1029/2008JD011183, 2009.](#)
- Lohmann, U., Feichter, J., Chuang, C. C., and Penner, J. E.: Prediction of the number of cloud droplets in the ECHAM GCM, *J. Geophys. Res.*, 104 (D8), 9169-9198, 1999.

- Lund, M. T., and Berntsen, T., Parameterization of black carbon aging in the OsloCTM2 and implications for regional transport to the Arctic, *Atmos. Chem. Phys.*, 12, 6999-7014, doi:10.5194/acp-12-6999-2012, 2012.
- Lund, M. T., Samset, B. H., Skeie, R. B., Watson-Parris, D., Katich, J. M., Schwarz, J. P., and Weinzierl, B.: Short black carbon lifetime from a global set of aircraft observations, *npj, Clim. Sci.*, 1:31, doi:10.1038/s41612-018-0040-x, 2018.
- 5 Ma, P.-L., Rasch, P. J., Fast, J. D., Easter, R. C., Gustafson Jr., W. I., Liu, X., Ghan S. J., and Singh, S.: Assessing the CAM5 physics suite in the WRF-Chem model: implementation, resolution sensitivity, and a first evaluation for regional case study, *Geosci. Model Dev.*, 7, 755-778, doi:10.5194/gmd-7-755-2014, 2014.
- Malavell, F. F., Haywood, J. M., Jones, A., Gettelman, A., Clarisse, L., Bauduin, S., Allan R. P., Karset, I. H. H., Krisjánsson, J. E., Oreopoulos, L., Cho, N., Lee, D., Bellouin, N., Boucher, O., Grosvenor, D. P., Carslaw, K. S., Dhomse, S., Mann, G.
- 10 W., Schmidt, A., Coe, H., Hartley, M. E., Dalvi, M., Hill, A. A., Johnson, B. T., Johnson, C. E., Knight, J. R., O'Connor, F. M., Partridge, D. G., Stier, P., Myhre, G., Platnick, S., Stephens, G. L., Takahashi, H., and Thordarson, T.: Strong constraints on aerosol-cloud interactions from volcanic eruptions, *Nature*, 546, 485-491, doi:10.1038/nature22974, 2017.
- Marelle, L., Raut, J. -C., Law, K. S., Berg, L. K., Fast, J. D., Easter, R. C., Shrivastava, M., and Thomas, J. L.: Improvements to the WRF-Chem 3.5.1 model for quasi-hemispheric simulations of aerosols and ozone in the Arctic,
- 15 *Geosci. Model Dev.*, 10, 3661-3677, doi:10.5194/gmd-3661-2017, 2017.
- Matsui, H., Kondo, Y., Moteki, N., Takegawa, N., Sahu, L. K., Zhao, Y., Fuelberg, H. E., Sessions, W. R., Diskin, G., Blake, D. R., Wisthaler, A., and Koike, M.: Seasonal variation of the transport of black carbon aerosol from the Asian continent to the Arctic during the ARCTAS aircraft campaign, *J. Geophys. Res.*, 115, D05202, doi:10.1029/2010JD015067, 2011.
- 20 Matsui, H., and Mahowald, N.: Development of a global aerosol model using a two-dimensional sectional method: 2. Evaluation and sensitivity simulations. *J. Adv. Model. Earth Syst.*, 9, 1887-1920, doi:10.1002/2017MS000937, 2017.
- Mellor, G. L., and Yamada, T.: A hierarchy of turbulence closure models for planetary boundary layers, *J. Atmos. Sci.*, 31, 1791-1806, doi: 10.1175/1520-0469(1974)031<1791:AHOTCM>2.0.CO;2, 1974.
- Miura, H.: An upwind-biases conservative advection scheme for spherical hexagonal-pentagonal grids, *Mon. Wea. Rev.*, 135,
- 25 4038-4044, 2007.

- Miyamoto, Y., Kajikawa, Y., Yoshida, R., Yamaura, T., Yashiro, H., and Tomita, H.: Deep moist atmospheric convection in a subkilometer global simulation, *Geophys. Res. Lett.*, 40(18), 4922-4926, doi:10.1002/grl.50944, 2013.
- Monahan, E. C., Spiel, D. E., and Davidson, K. L.: A model of marine aerosol generation via whitecaps and wave disruption, in *Oceanic Whitecaps and Their Role in Air-Sea Exchange Processes*, edited by E. C. Monahan and G. M. Niocaill, pp. 167-174, Springer, New York, 1986.
- 5 [Moteki, N., Kondo, Y., Miyazaki, Y., Takegawa, N., Komazaki, Y., Kurata, G., Shirai, T., Blake, D. R., Miyakawa, T., and Koike, M.: Evolution of mixing state of black carbon particles: Aircraft measurements over the western Pacific in March 2004, \*Geophys. Res. Lett.\*, 34, L11803, doi:10.1029/2006GL028943, 2007.](#)
- Myhre G., Samset, B.H., Schulz, M., Balkanski, Y., Bauer, S., Berntsen, T.K., Bian, H., Bellouin, N., Chin, M., Diehl, T., Easter, R.C., Feichter, J., Ghan, S.J., Hauglustaine, D., Iversen, T., Kinne, S., Kirkevåg, A., Lamarque, J.-F., Lin, G., Liu, X., Lund, M.T., Luo, G., Ma, X., van Noije, T., Penner, J.E., Rasch, P.J., Ruiz, A., Seland, Ø., Skeie, R.B., Stier, P., Takemura, T., Tsigaridis, K., Wang, P., Wang, Z., Xu, L., Yu, H., Yu, F., Yoon, J.-H., Zhang, K., Zhang, H., and Zhou, C.: Radiative forcing of the direct aerosol effect from AeroCom Phase II simulations, *Atmos. Chem. Phys.* 13, 1853-1877-, doi:10.5184/acp-13-1853-2013, 2013.
- 10 Nakajima, T., Tonna, G., Rao, R., Kaufman, Y., and Holben, B.: Use of sky brightness measurements from ground for remote sensing of particulate polydispersions. *Appl. Optics*, 35, 2672–2686, 1996.
- Nakanishi, M., and Niino, H.: An improved Mellor–Yamada level 3 model with condensation physics: its design and verification, *Bound. Layer Meteor.*, 112, 1–31, doi:10.1023/B:BOUN.0000020164.04146.98, 2004.
- Nam, C., Bony S., Dufresne, J.-L., and Chepfer, H.: The ‘too few, too bright’ tropical low-cloud problem in CMIP5 models, *Geophys. Res. Lett.*, 39, L21801, doi:10.1029/2012GL053421, 2012.
- 20 Niwa, Y., Tomita, H., Satoh, M., and Imasu, R.: A three-dimensional icosahedral grid advection scheme preserving monotonicity and consistency with continuity for atmospheric tracer transport, *J. Meteor. Soc. Jpn*, 89, 255–268, doi: 10.2151/jmsj.2011-306, 2011.

- Ohmura, A., Dutton, E.G., Forgan, B., Fröhlich, C., Gilgen, H., Hegner, H., Heimo, A., König-Langlo, G., McArthur, B., Müller, G., Philipona, R., Pinker, R., Whitlock, C.H., Dehne, K., and Wild, M.: Baseline surface radiation network (BSRN/WCRP), a new precision radiometry for climate research. *B. Am. Meteorol. Soc.*, 79, 2115-2136, 1998.
- Oikawa, E., Nakajima, T., and Winker, D.: An evaluation of the shortwave direct aerosol radiative forcing using CALIOP and MODIS observations, *J. Geophys. Res.*, 123, 1211-1233, doi:10.1029/2017JD027247, 2018.
- Oshima, N., Kondo, Y., Moteki, N., Takegawa, N., Koike, M., Kita, K., Matsui, H., Kajino, M., Nakamura, H., Jung, J. S., and Kim, Y. J.: Wet removal of black carbon in Asian outflow: Aerosol Radiative Forcing in East Asia (A-FORCE) aircraft campaign, *J. Geophys. Res.*, 117, D3204, doi:10.1029/2011JD016552, 2012.
- Partanen, A. -I., Dunne, E. M., Bergman, T., Laakso, A., Kokkoka, H., Ovadnevaite, J., Sogacheva, L., Baisnée, D., Sciare, J., Manders, A., O'Dowd, C., de Leeuw, G., and Korhonen, H.: Global modelling of direct and indirect effects of sea spray aerosol using a source function encapsulating wave state, *Atmos. Chem. Phys.*, 14, 11731-11752, doi:10.5194/acp-14-11731-2014, 2014.
- Pincus, R., McFarlane, S. A., and Klein, S. A.: Albedo bias and the horizontal variability of clouds in subtropical marine boundary layers: Observations from ships and satellites, *J. Geophys. Res.*, 104, D6, 6183-6191, 1999.
- Platnick, S., et al., ~~2015~~: MODIS Atmosphere L3 Monthly Product. NASA MODIS Adaptive Processing System, Goddard Space Flight Center, USA: [http://dx.doi.org/10.5067/MODIS/MOD08\\_M3.006\\_2015](http://dx.doi.org/10.5067/MODIS/MOD08_M3.006_2015).
- Prospero, J. M., Uematsu, M., and Savoie, D.: Mineral aerosol transport to the Pacific Ocean, in *Chemical Oceanography*, edited by Riley, J. P., Chester, R., and Duce, R. A., 10, 188–218, Academic, New York, USA, 1989.
- Qian, Y., Gustafson Jr., W. I., and Fast, J. D.: An investigation of the sub-grid variability of trace gases and aerosols for global climate modeling, *Atmos. Chem. Phys.*, 10, 6917-6946, doi:10.5194/acp-10-6917-2010, 2010.
- Quinn, P. K., Stohl, A., Arneft, A., Berntsen, T., Burkhart, J., Christensen, J., Flanner, M., Kupiainen, K., Luhavainen, H., Shepherd, M., Shevchenko, V., Skov, H., and Vestreng, V.: The Impact of black carbon on Arctic climate, 4, *Arctic Monitoring and Assessment Programme (AMAP)*, 2011.
- Raut, J. -C., Marelle, L., Fast, J. D., Thomas, J. L., Weinzierl, B., Law, K. S., Berg, L. K., Roiger, A., Easter, R. C., Heimerl, K., Onishi, T., Delanoë, and Schlager, H.: Cross-polar transport and scavenging of Siberian aerosols containing black carbon

during the 2012 ACCESS summer campaign, *Atmos. Chem. Phys.*, 17, 10969-10995, doi:10.5194/acp-17-10969-2017, 2017.

- 5 Samset, B. H., Myhre, G., Schulz, M., Balkanski, Y., Bauer, S., Berntsen, T. K., Bian, H., Bellouin, N., Diehl, T., Easter, R. C., Ghan, S. J., Iversen, T., Kinne, S., Kirkevåg, A., Lamarque, J.-F., Lin, G., Liu, X., Penner, J. E., Seland, Ø., Skeie, R. B., Stier, P., Takemura, T., Tsigaridis, K., and Zhang, K.: Black carbon vertical profiles strongly affect its radiative forcing uncertainty, *Atmos. Chem. Phys.*, 13, 2423-2434, doi:10.5194/acp-13-2423-2013, 2013.
- 10 Sand, M., Samset, B., Balkanski, Y., Bauer, S., Bellouin, N., Berntsen, T. K., Bian, H., Chin, M., Diehl, T., Easter, R., Ghan, S. J., Iversen, T., Kirkevåg, A., Lamarque, J. -F., Lin, G., Liu, X., Luo, G., Myhre, G., van Noije, T., Penner, J. E., Schulz, M., Seland, Ø., Skeie, R. B., Stier, P., Takemura, T., Tsigaridis, K., Yu, F., Zhang, K., and Zhang, H.: Aerosols at the poles: an AeroCom Phase II multi-model evaluation, *Atmos. Chem. Phys.*, 17, 12197-12218, doi:10.5194/acp-17-12197-2017, 2017.
- Sato, Y., Goto, D., Michibata, T., Suzuki, K., Takemura, T., Tomita, H., and Nakajima, T.: Aerosol effects on cloud water amounts were successfully simulated by a global cloud-system resolving model, *Nature Com.*, 9: 985, doi:10.1038/s41467-018-03379-6, 2018.
- 15 Sato, Y., Miura, H., Yashiro, H., Goto, D., Takemura, T., Tomita, H., and Nakajima, T.: Unrealistically pristine air in the Arctic produced by current global scale models, *Sci. Rep.*, 6, 26561, doi:10.1038/resp26561, 2016.
- Sato, Y., and Suzuki, K.: How do aerosols affect cloudiness?, *Science*, 363, 580-581, doi:10.1126/science.aaw3720, 2019.
- 20 Satoh, M., Matsuno, T., Tomita, H., Miura, H., Nasuno, T., and Iga, S.: Nonhydrostatic icosahedral atmospheric model (NICAM) for global cloud resolving simulations. *J. Comput. Phys.*, 227, 3486-3514. Doi:10.1016/j.jcp.2007.02.006, 2008.
- Satoh, M., Inoue, T., and Miura, H.: Evaluations of cloud properties of global and local cloud system resolving models using CALIPSO and CloudSat simulators, *J. Geophys. Res.*, 115, D00H14, doi:10.1029/2009JD012247, 2010.
- Satoh, M., Tomita, H., Yashiro, H., Miura, H., Kodama, C., Seiki, T., Noda, A.T., Yamada, Y., Goto, D., Sawada, M., Miyoshi, T., Niwa, Y., Hara, M., Ohno, T., Iga, S., Arakawa, T., Inoue, T., and Kubokawa, H.: The non-hydrostatic

icosahedral atmospheric model: description and development. *Progress in Earth and Planetary Science* 1, 18-49.

Doi:10.1186/s40645-014-0018-1, 2014.

5 [Sayer, A. M., Munchak, L. A., Hsu, N. C., Levy, R. C., Bettenhausen, C., and Jeong, M.-J.: MODIS Collection 6 aerosol products: Comparison between Aqua's e-Deep Blue, Dark Target, and "merged" data sets, and usage recommendations, \*J. Geophys. Res. Atmos.\*, 119\(24\), 13965-13989, doi:10.1002/2014JD022453, 2014.](#)

Schwarz, J. P., Gao, R. S., Fahey, D. W., Thomson, D. S., Watts, L. A., Wilson, J. C., Reeves, J. M., Darbeheshti, M., Baumgardner, D. G., Kok, G. L., Chung, S. H., Schulz, M., Hendricks, J., Lauer, A., Kärcher, B., Slowik, J. G., Rosenlof, K. H., Thompson, T. L., Langford, A. O., Loewenstein, M., and Aikin, K. C.: Single-particle measurements of midlatitude black carbon and light-scattering aerosols from the boundary layer to the lower stratosphere, *J. Geophys. Res.*, 111, D16207, doi:10.1029/2006JD007076, 2006.

10 Schwarz, J. P., Spackman, J. R., Gao, R. S., Watts, L. A., Stier, P., Schulz, M., Davis, S. M., Wofsy, S. C., and Fahey, D. W.: Global-scale black carbon profiles observed in the remote atmosphere and compared to models, *Geophys. Res. Lett.*, 37, L18812, doi:10.1029/2010GL044372, 2010.

15 Schwarz, J. P., Samset, B. H., Perring, A. E., Spackman, J. R., Gao, R. S., Stier, P., Schulz, M., Moore, F. L., Ray, E. A., and Fahey, D. W.: Global-scale seasonally resolved black carbon vertical profiles over the Pacific, *Geophys. Res. Lett.*, 40, 5542-5547, doi:10.1002/2013GL057775, 2013.

Schutgens, N. A. J., Gryspeerdt, E., Weigum, N., Tsyro, S., Goto, D., Schulz, M., and Stier, P.: Will a perfect model agree with perfect observations? The impact of spatial sampling. *Atmos. Chem. Phys.*, 16, 6335-6353, doi:10.5194/acp-16-6335-2016, 2016.

20 [Seinfeld, J. H. and Pandis, S. N.: Atmospheric Chemistry and Physics: From Air Pollution to Climate Change, 2nd ed., John Wiley and Sons, New York, USA, 2006.](#)

Sekiguchi, M., and Nakaima, T.: A k-distribution-based radiation code and its computational optimization for an atmospheric general circulation model, *J. Quant. Spectrosc. Radiat. Transf.*, 109, 2779-2793, doi:10.1016/j.jqsrt.2008.07.013, 2008.

- Sekiya, T., Miyazaki, K., Ogochi, K., Sudo, K., and Takigawa, M.: Global high-resolution simulations of tropospheric nitrogen dioxide using CHASER V4.0, *Geosci. Model Dev.*, 11, 958-988, doi:10.5194/gmd-11-959-2018, 2018.
- 5 [Sessions, W. R., Reid, J. S., Benedetti, A., Colarco, P. R., da Silba, A., Lu, S., Sekiyama, T., Tanaka, T. Y., Baldasano, J. M., Basart, S., Brooks, M. E., Eck, T. F., Iredell, M., Hansen, J. A., Jorba, O. C., Juang, H. -M. H., Lynch, P., Morcrette, J. -J., Moorthi, S., Mulcahy, J., Pradhan, Y., Razinger, M., Sampson, C. B., Wang, J., and Westphal, D. L.: Development towards a global operational aerosol consensus: basic climatological characteristics of the International Cooperative for Aerosol Prediction Multi-Model Ensemble \(ICAP-MME\), \*Atmos. Chem. Phys.\*, 15, 335-362, doi:10.5194/acp-15-335-2015.](#)
- 10 Sharma, S., Leaitch, W. R., Huang, L., Veber, D., Kolonjari, F., Zhang, W., Hanna, S. J., Bertram, A. K., and Ogren, J. A.: An evaluation of three methods for measuring black carbon in Alert, Canada, *Atmos. Chem. Phys.*, 17, 15255-15243, doi:10.5194/acp-17-15225-2017, 2017.
- 15 Shindell, D.T., Chin, M., Dentener, F., Doherty, R. M., Faluvegi, G., Fiore, A. M., Hess, P., Koch, D. M., MacKenzie, I. A., Sanderson, M. G., Schultz, M. G., Schulz, M., Stevenson, D. S., Teich, H., Textor, C., Wild, O., Bergmann, D. J., Bey, I., Bian, H., Cuvelier, C., Duncan, B. N., Folberth, G., Horowitz, L. W., Jonson, J., Kaminski, J. W., Marmer, E., Park, R., Pringle, K. J., Schroeder, S., Szopa, S., Takemura, T., Zeng, G., Keating, T. J., and Zuber, A.: A multi-model assessment of pollution transport to the Arctic, *Atmos. Chem. Phys.*, 8, 5353-5372, doi: 10.5194/acp-8-5353-2008, 2008.
- 20 Sinha, P. R., Kondo, Y., Koike, M., Ogren, J. A., Jefferson, A., Barrett, T. E., Sheesley, R. J., Ohara, S., Moteki, N., Coe, H., Liu, D., Irwin, M., Tunved, P., Quinn, P. K., and Zhao, Y.: Evaluation of ground-based black carbon measurements by filter-based photometers at two Arctic sites, *J. Geophys. Res. Atmos.*, 122, 3544-3572, doi:10.1002/2016JD025843, 2017.
- Stevens, B., and Feingold, G.: Untangling aerosol effects on clouds and precipitation in a buffered system, *Nature*, 461, 607-613, doi:10.1038/nature08281, 2009.

- Su, W., Loeb, N. G., Schuster, G. L., Chin, M., and Rose, F. G.: Global all-sky shortwave direct radiative forcing of anthropogenic aerosols from combined satellite observations and GOCART simulations: *J. Geophys. Res. Atmos.* 118, 655-669, doi:10.1029/2012JD018294, 2013.
- Sudo, K., Takahashi, M., Kurokawa, J., and Akimoto, H.: CHASER: A global chemical model of the troposphere: 1. Model description, *J. Geophys. Res.*, 107 (D17), 4339, doi:10.1029/2001JD001113, 2002.
- 5 Suzuki, K., Nakajima, T., Satoh, M., Tomita, H., Takemura, T., Nakajima, T.Y., and Stephens, G.L.: Global cloud-system-resolving simulation of aerosol effect on warm clouds. *Geophys. Res. Lett.*, 35, L19817. Doi:10.1029/2008GL035449, 2008.
- Takata, K., Emori, S., and Watanabe, T.: Development of the minimal advanced treatments of surface interaction and runoff, *Global. Planet. Change*, 38, 209-222, doi: 10.1016/S0921-8181(03)00030-4, 2003.
- 10 Takemura, T., Okamoto, H., Maruyama, Y., Numaguti, A., Higurashi, A., and T. Nakajima, T.: Global three-dimensional simulation of aerosol optical thickness distribution of various origins, *J. Geophys. Res.*, 105, 17853–17873, doi: 10.1029/2000JD900265, 2000.
- Takemura, T., Nozawa, T., Emori, S., Nakajima, T.Y., and Nakajima, T.: Simulation of climate response to aerosol direct and indirect effects with aerosol transport-radiation model. *J. Geophys. Res.*, 110, D02202, doi:10.1029/2004JD005029, 2005.
- 15 Textor, C., Schulz, M., Guibert, S., Kinne, S., Balkanski, Y., Bauer, S., Berntsen, T., Berglen, T., Boucher, O., Chin, M., Dentener, F., Diehl, T., Easter, R., Feichter, J., Fillmore, D., Ghan, S., Ginoux, P., Gong, S., Grini, A., Hendricks, J., Horowitz, L., Huang, P., Isaksen, I., Iversen, T., Kloster, S., Koch, D., Kirkevåg, A., Kristjansson, J. E., Krol, M., Lauer, A., Lamarque, J. F., Liu, X., Montanaro, V., Myhre, G., Penner, J. E., Pitari, G., Reddy, S., Seland, Ø., Stier, P., Takemura, T., and Tie, X.: Analysis and quantification of the diversities of aerosol life cycles within AeroCom, *Atmos. Chem. Phys.*, 6, 1777–1813, doi: 10.5194/acp-6-1777-2006, 2006.
- 20 Tomita, H.: New microphysics with five and six categories with diagnostic generation of cloud ice, *J. Meteorol. Soc. Jpn.*, 86A, 121-142, 2008.



- Tomita, H. and Satoh, M.: A new dynamical framework of nonhydrostatic global model using the icosahedral grid, *Fluid Dyn. Res.*, 34, 357-400, 2004.
- Tsigaridis, K., Daskalakis, N., Kanakidou, M., Adams, P. J., Artaxo, P., Bahadur, R., Balkanski, Y., Bauer, S. E., Bellouin, N., Benedetti, A., Bergman, T., Berntsen, T. K., Beukes, J. P., Bian, H., Carslaw, K. S., Chin, M., Curci, G., Diehl, T.,  
5 Easter, R. C., Ghan, S. J., Gong, S. L., Hodzic, A., Hoyle, C. R., Iversen, T., Jathar, S., Jimenez, J. L., Kaiser, J. W., Kirkevåg, A., Koch, D., Kokkola, H., Lee, Y. H., Lin, G., Liu, X., Luo, G., Ma, X., Mann, G. W., Mihalopoulos, N., Morcrette, J.-J., Müller, J.-F., Myhre, G., Myriokefalitakis, S., Ng, N. L., O'Donnell, D., Penner, J. E., Pozzoli, L., Pringle, K. J., Russell, L. M., Schulz, M., Sciare, J., Seland, Ø., Shindell, D. T., Sillman, S., Skeie, R. B., Spracklen, D.,  
10 Stavrou, T., Steenrod, S. D., Takemura, T., Tiitta, P., Tilmes, S., Tost, H., van Noije, T., van Zyl, P. G., von Salzen, K., Yu, F., Wang, Z., Wang, Z., Zaveri, R. A., Zhang, H., Zhang, K., Zhang, Q., and Zhang, X.: The AeroCom evaluation and intercomparison of organic aerosol in global models, *Atmos. Chem. Phys.*, 14, 10845-10895, doi:10.5194/acp-14-10845-2014, 2014.
- Van der Werf, Randerson, J. T., Giglio, L., van Leeuwen, T. T., Chen, Y., Rogers, B. M., Mu, M., van Marle, M. J. E.,  
15 Morton, D. C., Collatz, G. J., Yokelson, R. J., and Kasibhatla, P. S.: Global fire emissions estimates during 1997-2016, *Earth Syst. Sci. Data*, 9, 697-720, doi:10.5194/essd-9-697-2017, 2017.
- Vignati, E., Karl, M., Krol, M., Wilson, J., Stier, P., and Cavalli, F.: Sources of uncertainties in modelling black carbon at the global scale, *Atmos. Chem. Phys.*, 10, 2595-2611, doi:10.5194/acp-10-2595-2010. 2010.
- Watson-Parris, D., Schutgens, N. Winkler, D., Burton, S. P., Ferrare, R. A., and Stier, P.: On the limits of CALIOP for  
20 constraining modeled free tropospheric aerosol. *Geophys. Res. Lett.*, 45, 9260-9266, doi:10.1029/2018GL078195, 2018.
- Willis, M. D., Leaitch, W. R., and Abbatt, J. P. D.: Processes controlling the composition and abundance of Arctic aerosol, *Rev. Geophys.*, 56, doi:10.1029/2018RG000602, 2018.
- Winker, D. M., Tackett, J. L., Getzewich, B. J., Liu, Z., Vaughan, M. A., and Rogets, R. R.: The global 3-D distribution of tropospheric aerosols as characterized by CALIOP, *Atmos. Chem. Phys.*, 13, 3345-3361, doi:10.5194/acp-13-3345-2013, 2013.

- Wofsy, S. C., ~~B. C.~~ Daube, ~~B. C.~~ Jimenez, ~~R. E.~~ Kort, ~~E. J. V.~~ Pittman, ~~J. V. S.~~ Park, ~~S. R.~~ Commane, ~~R. B.~~ Xiang, ~~B. G.~~ Santoni, ~~G. D.~~ Jacob, ~~G. J.~~ Fisher, ~~J. C.~~ Pickett-Heaps, ~~C. H.~~ Wang, ~~H. K.~~ Wecht, ~~K. Q. Q.~~ Wang, ~~Q. Q.~~ ~~B. B.~~ Stephens, ~~Q. Q. S.~~ Shertz, ~~S. A. S.~~ Watt, ~~A. S. P.~~ Romashkin, ~~P. T.~~ Campos, ~~T. J.~~ Haggerty, ~~J. W. A.~~ Cooper, ~~W. A. D.~~ Rogers, ~~D. S.~~ Beaton, ~~S. R.~~ Hendershot, ~~R. J. W.~~ Elkins, ~~J. W. D. W.~~ Fahey, ~~D. W. R. S.~~ Gao, ~~R. S. F.~~ Moore, ~~F. S. A.~~ Montzka, ~~S. A. J. P.~~ Schwarz, ~~J. P. A. E.~~ Perring, ~~A. E. D.~~ Hurst, ~~D. B. R.~~ Miller, ~~B. R. C.~~ Sweeney, ~~C. S.~~ Oltmans, ~~S. D.~~ Nance, ~~D. E.~~ Hints, ~~E. G.~~ Dutton, ~~G. L. A.~~ Watts, ~~L. A. J. R.~~ Spackman, ~~J. R. K. H.~~ Rosenlof, ~~K. H. E. A.~~ Ray, ~~E. A. B.~~ Hall, ~~B. M. A.~~ Zondlo, ~~M. A. M.~~ Diao, ~~M. R.~~ Keeling, ~~R. J.~~ Bent, ~~J. E. L.~~ Atlas, ~~E. L. R.~~ Lueb, ~~R.~~ and ~~M. J.~~ Mahoney, ~~M. J.~~: HIPPO Merged 10-second Meteorology, Atmospheric Chemistry, Aerosol Data (R\_20121129). Carbon Dioxide Information Analysis Center, Oak Ridge National Laboratory, Oak Ridge, Tennessee, U.S.A. [http://dx.doi.org/10.3334/CDIAC/hippo\\_010](http://dx.doi.org/10.3334/CDIAC/hippo_010)~~http://dx.doi.org/10.3334/CDIAC/hippo\_010~~, 2012.
- 5
- 10
- Yasunari, T. J., Kim, K.-M., da Silva, A. M., Hayasaki, M., Akiyama, M., and Muraio, N.: Extreme air pollution events in Hokkaido, Japan, traced back to early snowmelt and large-scale wildfires over East Eurasia: Case studies, *Sci. Rep.*, 8, 6413, doi:10.1038/s41598-018-24335-w, 2018.
- Yu, P., Froyd, K. D., Portmann, R. W., Toon, O. B., Freitas, S. R., Bardeen, C. G., Brock, C., Fan, T., Gao, R. -S., Latich, J. M., Kupc, A., Liu, S., Maloney, C., Murphy, D. M., Rosenlof, K. H., Schill, G., Schwarz, J. P., and Williamson, C.: Efficient in-cloud removal of aerosols by deep convection, *Geophys. Res. Lett.*, 46, 1061-1069, doi:10.1029/2018GL080544, 2019.
- 15
- Zhang, X. Y., Wang, Y. Q., Niu, T., Zhang, X. C., Gong, S. L., Zhang, Y. M., and Sun, J. Y.: Atmospheric aerosol compositions in China: spatial/temporal variability, chemical signature, regional haze distribution and comparisons with global aerosols, *Atmos. Chem. Phys.*, 12, 779-799, doi:-10.5194/acp-12-779-2012, 2012.
- 20

Table 1. Details of the Datasets of observation datasets including information about period

| Name                                          | Product             | Variables                                                                                                                 | Region                         | Period                                  | Reference                                                                                                   |
|-----------------------------------------------|---------------------|---------------------------------------------------------------------------------------------------------------------------|--------------------------------|-----------------------------------------|-------------------------------------------------------------------------------------------------------------|
| <u>MODIS/Terra (MOD) and MODIS/Aqua (MYD)</u> | Satellite           | Cloud optical thickness (COT), <del>Cloud-cloud</del> fraction (CF), <del>Aerosol-aerosol</del> optical thickness (AOT)   | Global (1°×1°)                 | 2012-2014                               | Collection 6 for both clouds and aerosols retrieved from NASA                                               |
| <u>CALIOP/CALIPSO</u>                         |                     | Vertical extinction coefficient for aerosols                                                                              | Global (1°×1°)                 | 2012-2014                               | Version 3 (Winker et al., 2013)                                                                             |
| <u>CERES</u>                                  |                     | Top-of-atmosphere radiation fluxes                                                                                        | Global (1°×1°)                 | 2012-2014                               | CERES_EBAF_Ed2.8 provided by NASA/LaRC (Langley Research Center) Hampton                                    |
| <u>NCEP</u>                                   | Reanalysis          | U and V (wind speed components) at a height of 10 m                                                                       | Global (2.5°×2.5°)             | 2012-2014                               | NCEP/NCAR Reanalysis 1: Surface Flux                                                                        |
| <u>GPCP</u>                                   |                     | Precipitation                                                                                                             | Global (2.5°×2.5°)             | 2012-2014                               | Version 2.3 by Adler et al. (2003)                                                                          |
| <u>AERONET</u>                                | In situ measurement | AOT                                                                                                                       | Global                         | 2000-2015                               | Level 2 daily version 2; accessed on 2015/06/27; Holben et al. (1998)                                       |
| <u>SKYNET</u>                                 |                     |                                                                                                                           | Asia and New Zealand           | 2005-2015 <sup>#1</sup>                 | Nakajima et al. (1996)                                                                                      |
| <u>CARSNET</u>                                |                     |                                                                                                                           | China                          | 2002-2013                               | Che et al. (2015)                                                                                           |
| <u>BSRN</u>                                   |                     | <del>Radiation fluxes (globalSurface solar radiation, (SSR) and direct and diffuse) radiation fluxes</del> at the surface | Global                         | 2008-2012                               | Ohmura et al. (1998)                                                                                        |
| <u>IMPROVE</u>                                |                     | Aerosol mass concentration at the surface                                                                                 | United States                  | 2006-2015 <sup>#1</sup>                 | IMPROVE (Interagency Monitoring of Protected Visual Environments)                                           |
| <u>EMEP</u>                                   |                     |                                                                                                                           | Europe                         | 2007-2015 <sup>#1</sup>                 | WMO Global Atmosphere Watch, World Data Center for Aerosols                                                 |
| <u>EANET</u>                                  |                     |                                                                                                                           | Asia                           | 2005-2013 <sup>#1</sup>                 | EANET (Acid Deposition Monitoring Network in East Asia; <a href="http://eanet.asia">http://eanet.asia</a> ) |
| <u>CAWNET</u>                                 |                     |                                                                                                                           | China                          | 2006-2007                               | Zhang et al. (2012)                                                                                         |
| <u>University of Miami, US</u>                |                     |                                                                                                                           | Global                         | Some in the 1980s and others after 2000 | Prospero et al. (1989); Liu et al. (2007)                                                                   |
| <u>EMEP and WDCS</u>                          |                     | <u>BC mass concentrations at the surface</u>                                                                              | <u>Alert, Zeppelin, Barrow</u> | <u>2007-2011</u>                        | <u><a href="http://ebas.nilu.no/">http://ebas.nilu.no/</a></u>                                              |
| <u>CABM</u>                                   |                     | <u>Sulfate mass</u>                                                                                                       | <u>Alert</u>                   | <u>2000-2006</u>                        | <u>Canadian Aerosol Baseline</u>                                                                            |

|                               |                             | <u>concentrations at the surface</u> |                                 |                                                          | <u>Measurement (CABM) program</u>                                                                                                                                                |
|-------------------------------|-----------------------------|--------------------------------------|---------------------------------|----------------------------------------------------------|----------------------------------------------------------------------------------------------------------------------------------------------------------------------------------|
| <u>EMEP</u>                   |                             |                                      | <u>Zeppelin</u>                 | <u>2005-2013</u>                                         | <u><a href="http://ebas.nilu.no/">http://ebas.nilu.no/</a></u>                                                                                                                   |
| <u>Eckhardt et al. (2015)</u> |                             |                                      | <u>Barrow</u>                   | <u>2008-2009</u>                                         | <u>Eckhardt et al. (2015)</u>                                                                                                                                                    |
| <u>HIPPO</u>                  | <u>Aircraft measurement</u> | <u>BC mass concentrations</u>        | <u>Pacific Ocean</u>            | <u>January, March, June, August and November in 2009</u> | <u>High-performance Instrumented Airborne Platform for Environmental Research (HIAPER) Pole-to-Pole Observations (HIPPO) campaign (Schwarz et al., 2010; Wofsy et al., 2012)</u> |
| <u>AFORCE</u>                 |                             |                                      | <u>East Asia</u>                | <u>March-April, 2012</u>                                 | <u>Aerosol Radiative Forcing in East Asia (A-FORCE) campaign (Oshima et al., 2012)</u>                                                                                           |
| <u>ARCTAS-A</u>               |                             |                                      | <u>Arctic</u>                   | <u>March-April, 2008</u>                                 | <u>Arctic Research of the Composition of the Troposphere from Aircraft and Satellites (ARCTAS) campaign (Jacob et al., 2010)</u>                                                 |
| <u>ARCTAS-B</u>               |                             |                                      | <u>Arctic and North America</u> | <u>July-August, 2008</u>                                 | <u>Arctic Research of the Composition of the Troposphere from Aircraft and Satellites (ARCTAS) campaign (Jacob et al., 2010)</u>                                                 |

<sup>#1</sup> The period depends on the site.

Table 2. Global aerosol budgets simulated by the HRM and LRM

| Species         | Parameter                                          | HRM         | LRM         | DIF*      | Reference                                                                                                                                  |
|-----------------|----------------------------------------------------|-------------|-------------|-----------|--------------------------------------------------------------------------------------------------------------------------------------------|
| <b>Dust</b>     | Column [Tg]                                        | 27.08       | 27.01       | 0         | 15.8 (6.8-29.5) <sup>k</sup> , 19.20 (11.5-26.9) <sup>a</sup> , 28.5 <sup>b</sup>                                                          |
|                 | Emission [Tg <sub>yr</sub> <sup>-1</sup> ]         | 1805        | 1911        | 6         | 1123 (514-4313) <sup>k</sup> , 1840 (938-2742) <sup>a</sup> , 2677 <sup>b</sup>                                                            |
|                 | Dry Deposition [Tg <sub>yr</sub> <sup>-1</sup> ]   | 342         | 363         | 6         | 396 (37-2791) <sup>k</sup>                                                                                                                 |
|                 | Grav. Deposition [Tg <sub>yr</sub> <sup>-1</sup> ] | 634         | 663         | 5         | 314 (22-2475) <sup>k</sup>                                                                                                                 |
|                 | Wet Deposition [Tg <sub>yr</sub> <sup>-1</sup> ]   | 825         | 880         | 7         | 357 (295-1382) <sup>k</sup>                                                                                                                |
|                 | Lifetime [Day]                                     | 5.49        | 5.17        | -6        | 3.9 <sup>b</sup> , 4.14 (2.36-5.92) <sup>a</sup> , 4.6 (1.6-7.1) <sup>k</sup>                                                              |
| <b>Sea salt</b> | Column [Tg]                                        | 5.60        | 5.42        | -3        | 5.62 <sup>l</sup> , 6.8 <sup>c</sup> , 7.52 (3.5-11.6) <sup>a</sup> , 13.6 <sup>b</sup>                                                    |
|                 | Emission [Tg <sub>yr</sub> <sup>-1</sup> ]         | 8856        | 9624        | 9         | 805 (378-1233) <sup>c</sup> , 3529 <sup>l</sup> , 4015.5 <sup>c</sup> , 5039 <sup>b</sup> , 10200 <sup>d</sup> , 16600±199% <sup>a</sup> , |
|                 | Dry Deposition [Tg <sub>yr</sub> <sup>-1</sup> ]   | 2272        | 2169        | -5        | 1313 <sup>l</sup>                                                                                                                          |
|                 | Grav. Deposition [Tg <sub>yr</sub> <sup>-1</sup> ] | 1998        | 1951        | -2        | 327 <sup>l</sup>                                                                                                                           |
|                 | Wet Deposition [Tg <sub>yr</sub> <sup>-1</sup> ]   | 4586        | 5504        | 20        | 1889 <sup>l</sup>                                                                                                                          |
|                 | Lifetime [Day]                                     | 0.23        | 0.21        | -11       | 0.03-1.59 <sup>a</sup> , 0.48 (0.20-0.76) <sup>a</sup> , 0.62 <sup>c</sup> , 0.80 <sup>l</sup> , 0.98 <sup>b</sup>                         |
| <b>Sulfate</b>  | Column [TgS]                                       | 0.38        | 0.32        | -16       | 0.59 (0.34-0.93) <sup>i</sup> , 0.66 (0.50-0.83) <sup>a</sup>                                                                              |
|                 | Production [TgS <sub>yr</sub> <sup>-1</sup> ]      | 58.4        | 56.7        | -3        | 37.6-61.1 <sup>l</sup> , 44.0 <sup>b</sup>                                                                                                 |
|                 | <u>from the gas phase</u>                          | <u>16.8</u> | <u>16.1</u> | <u>-4</u> | <u>6.2<sup>l</sup>-17.4<sup>m</sup></u>                                                                                                    |
|                 | <u>from the aqueous phase</u>                      | <u>41.7</u> | <u>40.6</u> | <u>-3</u> | <u>21.1<sup>m</sup>-58.8<sup>l</sup></u>                                                                                                   |
|                 | Dry Deposition [TgS <sub>yr</sub> <sup>-1</sup> ]  | 3.9         | 3.6         | -8        | 5.8-7.6 <sup>l</sup>                                                                                                                       |
|                 | Grav. Deposition [Tg <sub>yr</sub> <sup>-1</sup> ] | 0.5         | 0.4         | -8        | 0.0 <sup>l</sup>                                                                                                                           |
|                 | Wet Deposition [TgS <sub>yr</sub> <sup>-1</sup> ]  | 52.0        | 50.4        | -3        | 31.8-53.5 <sup>l</sup>                                                                                                                     |
|                 | Lifetime [Day]                                     | 2.38        | 2.05        | -14       | 3.3 <sup>b</sup> , 4.12 (3.4-4.9) <sup>a</sup>                                                                                             |
| <b>POM</b>      | Column [Tg]                                        | 1.04        | 0.94        | -10       | 1.2 <sup>nm</sup> , 1.6 (0.8-2.6) <sup>i</sup> , 1.70 (1.24-2.16) <sup>a</sup> ,                                                           |
|                 | Emission [Tg <sub>yr</sub> <sup>-1</sup> ]         | 82.2        | 81.9        | 0         | 96.6 (71.5-121.7) <sup>a</sup>                                                                                                             |
|                 | Dry Deposition [Tg <sub>yr</sub> <sup>-1</sup> ]   | 6.3         | 6.6         | 4         | approximately 15 (0.2-28) <sup>i</sup>                                                                                                     |
|                 | Grav. Deposition [Tg <sub>yr</sub> <sup>-1</sup> ] | 3.7         | 3.9         | 5         |                                                                                                                                            |
|                 | Wet Deposition [Tg <sub>yr</sub> <sup>-1</sup> ]   | 72.6        | 71.4        | -2        | approximately 90 (approximately 50-140) <sup>i</sup>                                                                                       |
|                 | Lifetime [Day]                                     | 4.60        | 4.17        | -9        | 5.3 <sup>nm</sup> , approximately 6 (approximately 4-8) <sup>i</sup> , 6.54 (4.77-8.31) <sup>a</sup>                                       |
| <b>BC</b>       | Column [Tg]                                        | 0.13        | 0.10        | -23       | 0.11 <sup>b</sup> , 0.22 <sup>nm</sup> , 0.24 (0.14-0.34) <sup>a</sup>                                                                     |
|                 | Emission [Tg <sub>yr</sub> <sup>-1</sup> ]         | 7.3         | 7.3         | -1        | 11.9 (9.2-14.6) <sup>a</sup>                                                                                                               |
|                 | Dry Deposition [Tg <sub>yr</sub> <sup>-1</sup> ]   | 0.8         | 0.8         | -1        |                                                                                                                                            |
|                 | Grav. Deposition [Tg <sub>yr</sub> <sup>-1</sup> ] | 0.2         | 0.2         | 1         |                                                                                                                                            |
|                 | Wet Deposition [Tg <sub>yr</sub> <sup>-1</sup> ]   | 6.3         | 6.3         | -1        |                                                                                                                                            |
|                 | Lifetime [Day]                                     | 6.37        | 4.96        | -22       | <5 <sup>f,g</sup> , 5.0 <sup>b</sup> , 6.4 <sup>nm</sup> , 7.12 (4.77-9.47) <sup>a</sup> , 7.4 <sup>h</sup>                                |

|             |                                                    |      |      |     |                                                                           |
|-------------|----------------------------------------------------|------|------|-----|---------------------------------------------------------------------------|
| <b>WSBC</b> | Column [Tg]                                        | 0.06 | 0.05 | -11 | 0.19 <sup>mm</sup>                                                        |
|             | Emission [Tg <sub>yr</sub> <sup>-1</sup> ]         | 4.5  | 4.5  | -1  |                                                                           |
|             | Dry Deposition [Tg <sub>yr</sub> <sup>-1</sup> ]   | 0.4  | 0.4  | 3   |                                                                           |
|             | Grav. Deposition [Tg <sub>yr</sub> <sup>-1</sup> ] | 0.2  | 0.2  | 1   |                                                                           |
|             | Wet Deposition [Tg <sub>yr</sub> <sup>-1</sup> ]   | 3.9  | 3.9  | -1  |                                                                           |
|             | Lifetime [Day]                                     | 4.78 | 4.29 | -10 | 6.4 <sup>mm</sup>                                                         |
| <b>WIBC</b> | Column [Tg]                                        | 0.07 | 0.05 | -33 | 0.03 <sup>mm</sup>                                                        |
|             | Emission [Tg <sub>yr</sub> <sup>-1</sup> ]         | 2.8  | 2.8  | -1  |                                                                           |
|             | Dry Deposition [Tg <sub>yr</sub> <sup>-1</sup> ]   | 0.4  | 0.4  | -4  |                                                                           |
|             | Grav. Deposition [Tg <sub>yr</sub> <sup>-1</sup> ] | 0.0  | 0.0  | -6  |                                                                           |
|             | Wet Deposition [Tg <sub>yr</sub> <sup>-1</sup> ]   | 2.4  | 2.4  | 0   |                                                                           |
|             | Lifetime [Day]                                     | 8.95 | 6.04 | -33 | 1.0 <sup>mm</sup> , 1.0-1.7 <sup>no</sup> , 9.6 (w/o aging) <sup>no</sup> |

\* DIF is defined as (LRM-HRM)/HRM in percent.

<sup>a</sup> Textor et al. (2006); <sup>b</sup> Matsui and Mahowald (2017); <sup>c</sup> Bian et al. (2019); <sup>d</sup> Grythe et al. (2014); <sup>e</sup> Partanen et al. (2014); <sup>f</sup> Lund et al. (2018); <sup>g</sup> Samset et al. (2014); <sup>h</sup> Shindell et al. (2008); <sup>i</sup> Tsigaridis et al. (2014); <sup>j</sup> Myhre et al. (2013); <sup>k</sup> Huneus et al. (2011); <sup>l</sup> Takemura et al. (2000); <sup>m</sup> [Goto et al. \(2011\)](#); <sup>mm</sup> Chung and Seinfeld (2002); <sup>no</sup> Goto et al. (2012)

Table 3. IRFari <sup>1</sup>Direct ARFs\* at the top of atmosphere (TOA) and the surface with the uncertainties<sup>2</sup> in units of W m<sup>-2</sup>

| Wavelength                     | Species      | TOA             |                 |                 |                 | Surface |       |           |       |
|--------------------------------|--------------|-----------------|-----------------|-----------------|-----------------|---------|-------|-----------|-------|
|                                |              | All-sky         |                 | Clear-sky       |                 | All-sky |       | Clear-sky |       |
|                                |              | HRM             | LRM             | HRM             | LRM             | HRM     | LRM   | HRM       | LRM   |
| SW+LW                          | Dust         | -0.71           | -0.72           | -0.92           | -0.95           | -1.17   | -1.22 | -1.36     | -1.41 |
|                                | Sea salt     | -0.48           | -0.47           | -0.74           | -0.75           | -0.29   | -0.31 | -0.29     | -0.30 |
|                                | Sulfate      | -0.45           | -0.39           | -0.67           | -0.61           | -0.38   | -0.33 | -0.57     | -0.51 |
|                                | intBC+POM    | 0.05            | 0.06            | 0.01            | 0.01            | -0.36   | -0.33 | -0.41     | -0.39 |
|                                | SOA          | -0.23           | -0.21           | -0.34           | -0.31           | -0.32   | -0.29 | -0.42     | -0.39 |
|                                | extBC (WIBC) | 0.09            | 0.07            | 0.05            | 0.05            | -0.21   | -0.14 | -0.25     | -0.17 |
|                                | All          | -1.73           | -1.67           | -2.60           | -2.57           | -2.74   | -2.63 | -3.30     | -3.18 |
|                                |              |                 |                 |                 |                 |         |       |           |       |
| SW                             | Dust         | -0.85           | -0.87           | -1.10           | -1.13           | -1.47   | -1.55 | -1.69     | -1.79 |
|                                | Sea salt     | -0.52           | -0.52           | -0.85           | -0.88           | -0.54   | -0.53 | -0.86     | -0.89 |
|                                | Sulfate      | -0.47           | -0.41           | -0.71           | -0.64           | -0.46   | -0.40 | -0.68     | -0.61 |
|                                | intBC+POM    | 0.05            | 0.05            | 0.01            | 0.01            | -0.37   | -0.34 | -0.43     | -0.40 |
|                                | SOA          | -0.23           | -0.21           | -0.34           | -0.32           | -0.33   | -0.30 | -0.44     | -0.41 |
|                                | extBC (WIBC) | 0.09            | 0.06            | 0.05            | 0.04            | -0.21   | -0.15 | -0.25     | -0.17 |
|                                | All          | -1.95           | -1.89           | -2.95           | -2.93           | -3.37   | -3.27 | -4.36     | -4.28 |
|                                |              |                 |                 |                 |                 |         |       |           |       |
| Wavelength                     | Species      | All-sky         |                 | Clear-sky       |                 |         |       |           |       |
|                                |              | HRM             | LRM             | HRM             | LRM             |         |       |           |       |
| <b>Top of Atmosphere (TOA)</b> |              |                 |                 |                 |                 |         |       |           |       |
| SW+LW                          | Dust         | -0.708 (±0.002) | -0.721 (±0.009) | -0.907 (±0.002) | -0.947 (±0.010) |         |       |           |       |
|                                | Sea salt     | -0.474 (±0.000) | -0.470 (±0.002) | -0.735 (±0.001) | -0.755 (±0.003) |         |       |           |       |
|                                | Sulfate      | -0.440 (±0.001) | -0.392 (±0.002) | -0.663 (±0.001) | -0.606 (±0.003) |         |       |           |       |
|                                | intBC+POM    | 0.052 (±0.000)  | 0.057 (±0.001)  | 0.010 (±0.000)  | 0.009 (±0.001)  |         |       |           |       |
|                                | SOA          | -0.227 (±0.000) | -0.209 (±0.002) | -0.335 (±0.001) | -0.312 (±0.003) |         |       |           |       |
|                                | extBC        | 0.086 (±0.000)  | 0.066 (±0.000)  | 0.052 (±0.000)  | 0.046 (±0.000)  |         |       |           |       |
|                                | All          | -1.717 (±0.002) | -1.670 (±0.010) | -2.585 (±0.003) | -2.565 (±0.012) |         |       |           |       |
|                                |              |                 |                 |                 |                 |         |       |           |       |
| SW                             | Dust         | -0.843 (±0.002) | -0.869 (±0.010) | -1.084 (±0.003) | -1.134 (±0.012) |         |       |           |       |
|                                | Sea salt     | -0.521 (±0.000) | -0.517 (±0.002) | -0.851 (±0.001) | -0.883 (±0.003) |         |       |           |       |
|                                | Sulfate      | -0.466 (±0.001) | -0.415 (±0.002) | -0.703 (±0.001) | -0.641 (±0.003) |         |       |           |       |
|                                | intBC+POM    | 0.049 (±0.000)  | 0.055 (±0.001)  | 0.006 (±0.000)  | 0.006 (±0.001)  |         |       |           |       |
|                                | SOA          | -0.231 (±0.000) | -0.212 (±0.002) | -0.341 (±0.001) | -0.318 (±0.003) |         |       |           |       |
|                                | extBC        | 0.084 (±0.000)  | 0.065 (±0.000)  | 0.050 (±0.000)  | 0.045 (±0.000)  |         |       |           |       |
|                                | All          | -1.936 (±0.003) | -1.895 (±0.011) | -2.936 (±0.003) | -2.925 (±0.013) |         |       |           |       |
|                                |              |                 |                 |                 |                 |         |       |           |       |
| <b>Surface</b>                 |              |                 |                 |                 |                 |         |       |           |       |
| SW+LW                          | Dust         | -1.158 (±0.003) | -1.222 (±0.014) | -1.336 (±0.003) | -1.414 (±0.015) |         |       |           |       |
|                                | Sea salt     | -0.296 (±0.000) | -0.306 (±0.001) | -0.293 (±0.000) | -0.304 (±0.002) |         |       |           |       |
|                                | Sulfate      | -0.380 (±0.001) | -0.334 (±0.002) | -0.564 (±0.001) | -0.510 (±0.003) |         |       |           |       |
|                                | intBC+POM    | -0.359 (±0.001) | -0.335 (±0.003) | -0.410 (±0.001) | -0.388 (±0.003) |         |       |           |       |
|                                | SOA          | -0.316 (±0.001) | -0.292 (±0.002) | -0.415 (±0.001) | -0.388 (±0.003) |         |       |           |       |
|                                | extBC        | -0.205 (±0.000) | -0.144 (±0.001) | -0.245 (±0.000) | -0.171 (±0.001) |         |       |           |       |
|                                |              |                 |                 |                 |                 |         |       |           |       |
|                                |              |                 |                 |                 |                 |         |       |           |       |

|                  |                  |                        |                        |                        |                        |
|------------------|------------------|------------------------|------------------------|------------------------|------------------------|
|                  | <u>All</u>       | <u>-2.715 (±0.004)</u> | <u>-2.633 (±0.017)</u> | <u>-3.260 (±0.005)</u> | <u>-3.176 (±0.020)</u> |
| <b><u>SW</u></b> | <u>Dust</u>      | <u>-1.447 (±0.004)</u> | <u>-1.552 (±0.019)</u> | <u>-1.668 (±0.004)</u> | <u>-1.793 (±0.021)</u> |
|                  | <u>Sea salt</u>  | <u>-0.535 (±0.000)</u> | <u>-0.530 (±0.002)</u> | <u>-0.862 (±0.001)</u> | <u>-0.892 (±0.003)</u> |
|                  | <u>Sulfate</u>   | <u>-0.450 (±0.001)</u> | <u>-0.399(±0.002)</u>  | <u>-0.673 (±0.001)</u> | <u>-0.613 (±0.003)</u> |
|                  | <u>intBC+POM</u> | <u>-0.371 (±0.001)</u> | <u>-0.342 (±0.003)</u> | <u>-0.424 (±0.001)</u> | <u>-0.399 (±0.004)</u> |
|                  | <u>SOA</u>       | <u>-0.327 (±0.001)</u> | <u>-0.303 (±0.003)</u> | <u>-0.433 (±0.001)</u> | <u>-0.406 (±0.003)</u> |
|                  | <u>extBC</u>     | <u>-0.208 (±0.000)</u> | <u>-0.146 (±0.001)</u> | <u>-0.248 (±0.000)</u> | <u>-0.173 (±0.001)</u> |
|                  | <u>All</u>       | <u>-3.330 (±0.005)</u> | <u>-3.272 (±0.022)</u> | <u>-4.315 (±0.006)</u> | <u>-4.277 (±0.024)</u> |

<sup>1</sup>\* The estimated ARFs-IRFari are 1-year averages due to the limited computer resource. <sup>2</sup> The uncertainties are given as the global confidence intervals with a significance threshold of 95%.



(a) Observation sites for aerosol mass

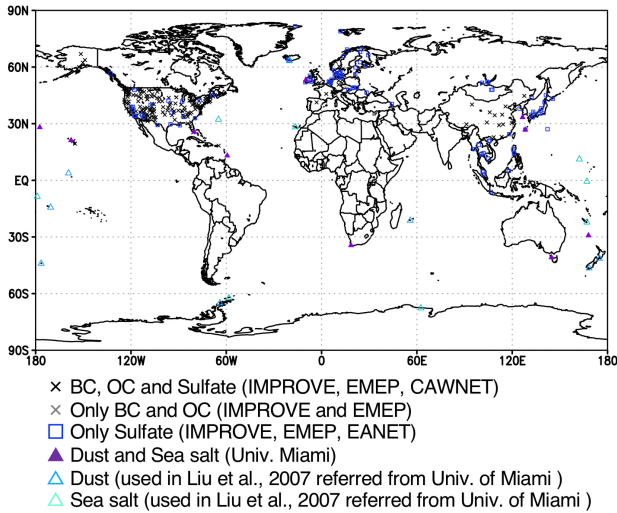

(b) Observation sites for AOT and radiation

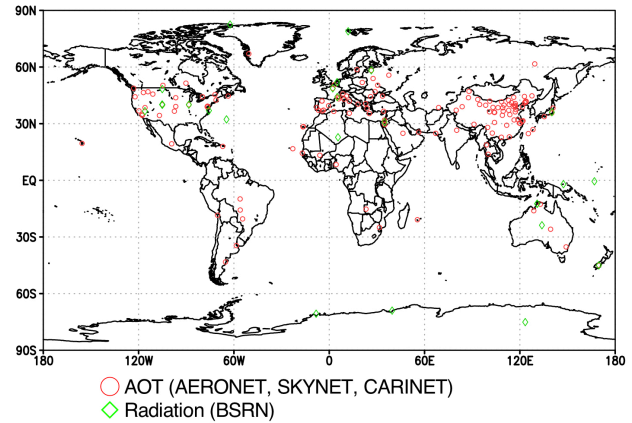

(a) Observation sites for aerosol mass

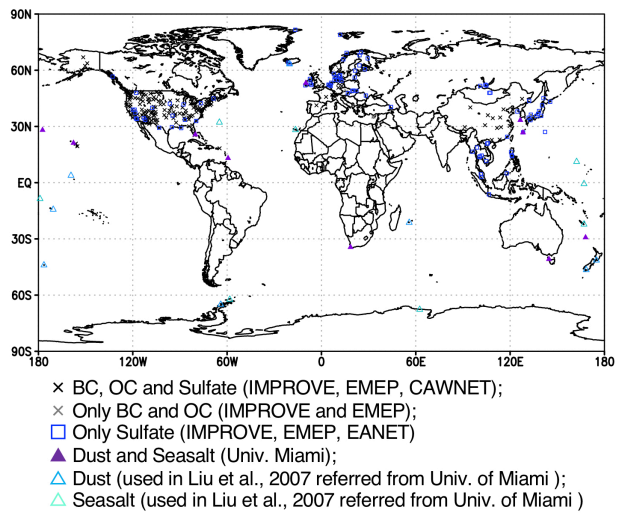

(b) Observation sites for AOD and radiation

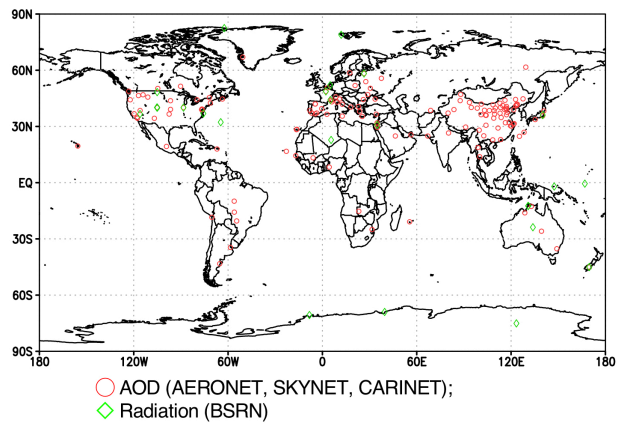

**Figure 1: Global distribution of observation sites used in the model evaluation. Detailed information on these sites is provided in [Tables S1-S4](#) in the supplementary material.**

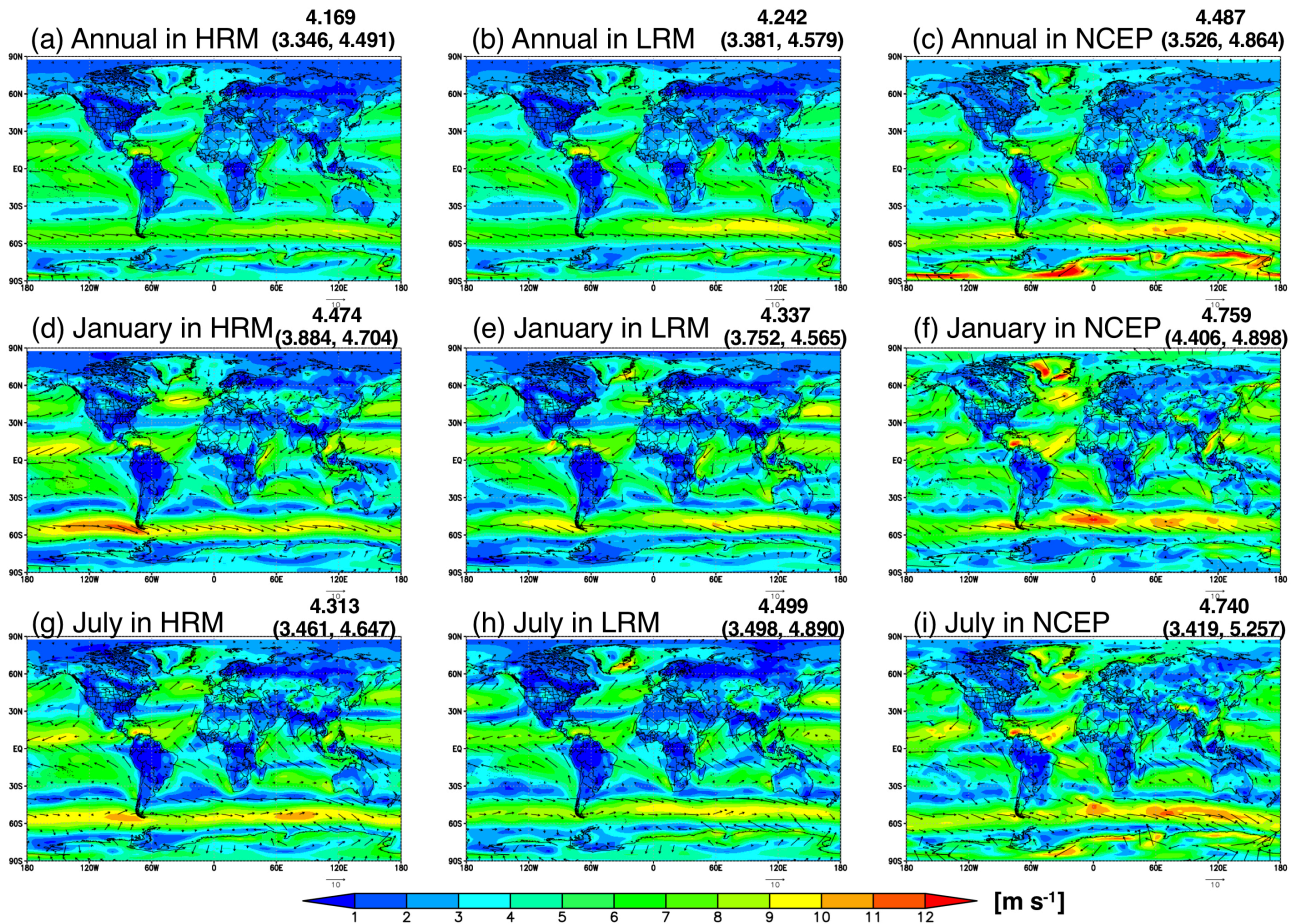

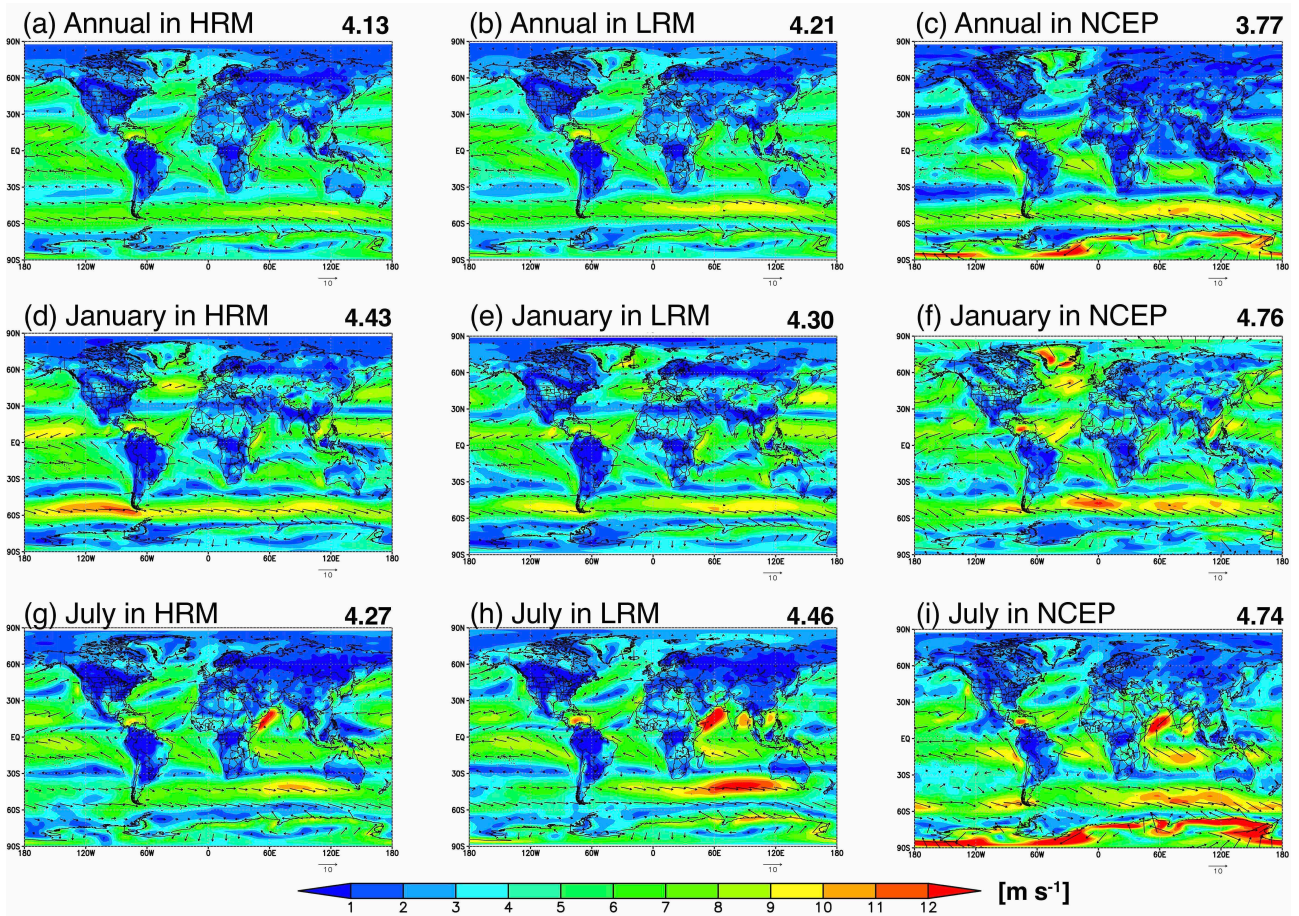

Figure 2: Global distributions of the annual, January and July averages of the wind speed at a height of 10 m simulated by the HRM and LRM and reanalyzed by the NCEP. The colors and arrows represent the wind speed and wind direction, respectively. The model results in both the HRM and the LRM are horizontally interpolated onto the NCEP grids ( $2.5^{\circ} \times 2.5^{\circ}$ ). The numbers shown in the upper-right corner in each panel represent the global averages ( $90^{\circ}\text{S}-90^{\circ}\text{N}$ ); those in brackets represent the global land and ocean averages. All units are in  $\text{m s}^{-1}$ .

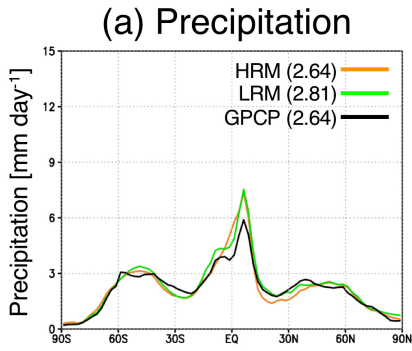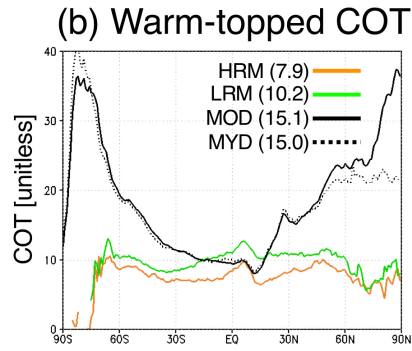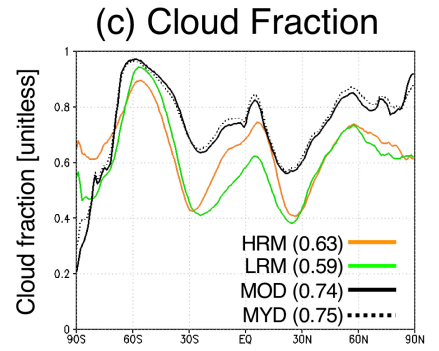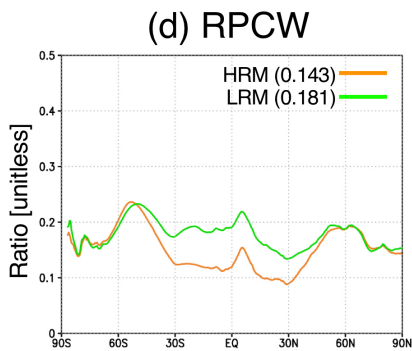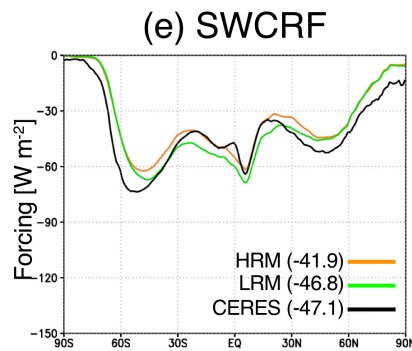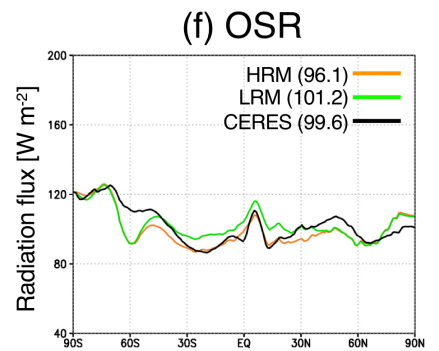

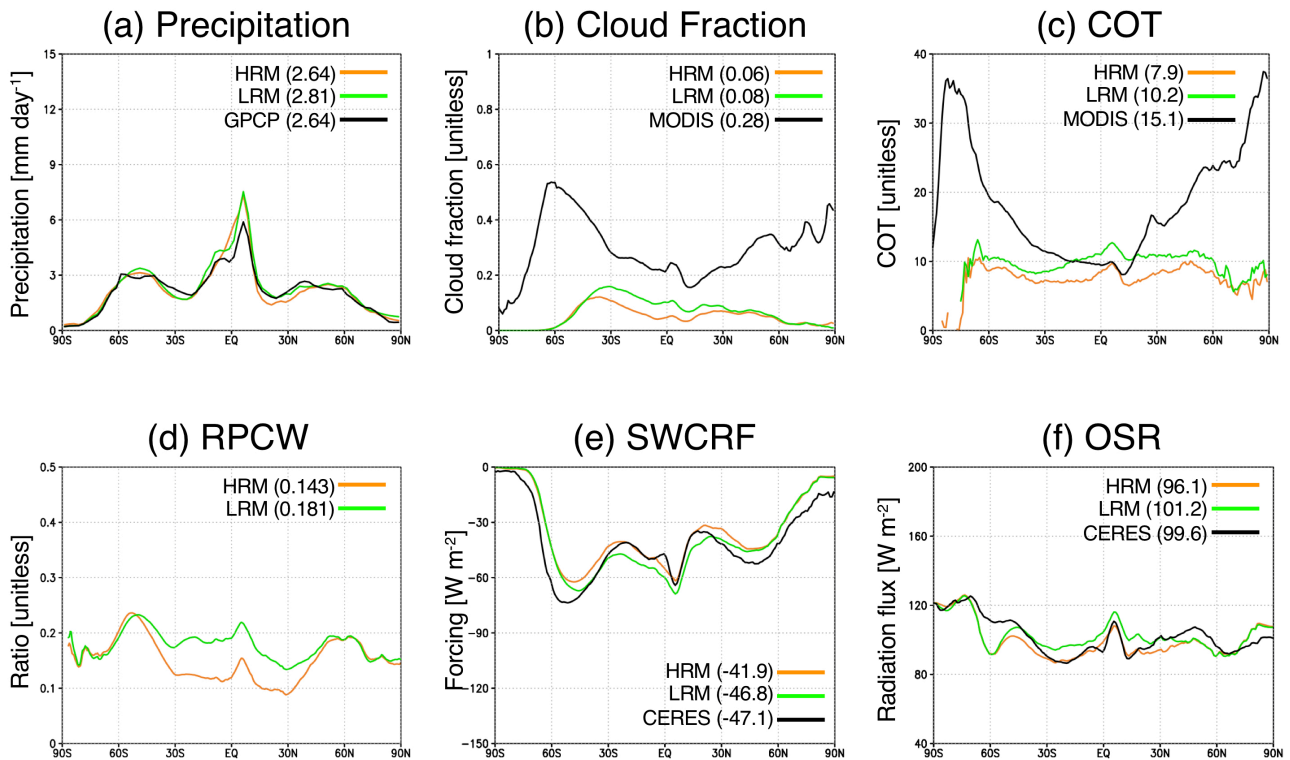

Figure 3: Zonal distributions of the annual averages of ~~the~~ (a) precipitation, (b) ~~cloud fraction (CF) for water-phase clouds,~~ (c) cloud optical thickness (COT) for ~~waterwarm-phase-topped~~ clouds, (d) ~~cloud fraction (CF) in all types of clouds,~~ (e) ratio of precipitation to total cloud water (RPCW) at ~~a 2-km-height of 2 km,~~ (f) short-wave cloud radiative forcing (SWCRF) and (g) outgoing shortwave radiation flux (OSR) simulated by the HRM and LRM, reanalyzed by the GPCP only in (a), retrieved from ~~both the~~ MODIS/Terra (MOD) and MODIS/Aqua (MYD) in (b) and (c), and estimated by ~~the~~ CERES in (e) and (f). The annual averages of these variables except for CF and COT are calculated by a 3-year integration, whereas those in CF and COT are calculated by a 1-year integration using 6-hourly instantaneous clouds at 12:00 (local time) to more exactly compare them with the ~~observed~~ MODIS/Terra ~~observation~~ at approximately 1410:00-30 (local time) ~~and with the MODIS/Aqua observation at approximately 13:30 (local time).~~ The numbers shown in the captions represent the global and annual averages for NICAM (HRM or LRM) and the reference data. The units are described in each panel.



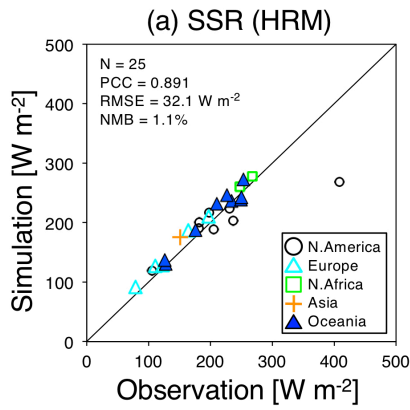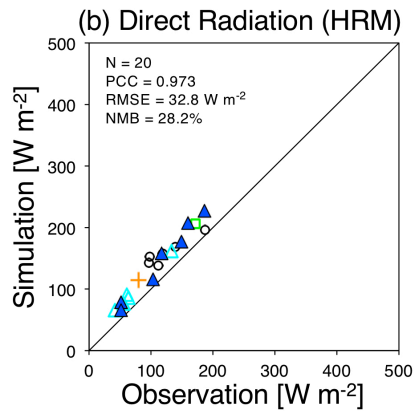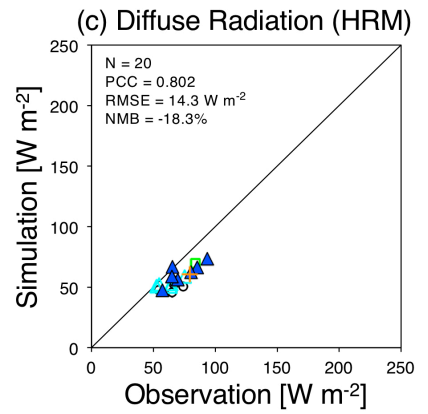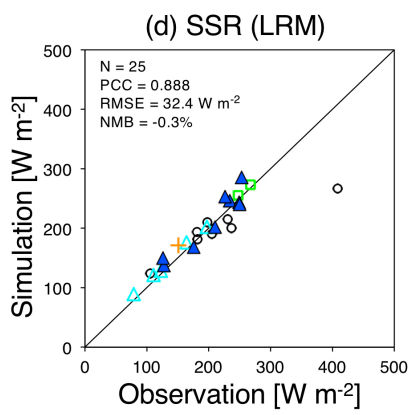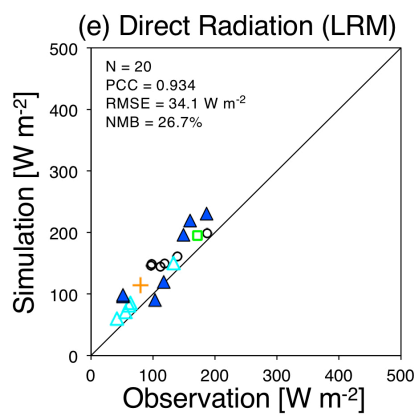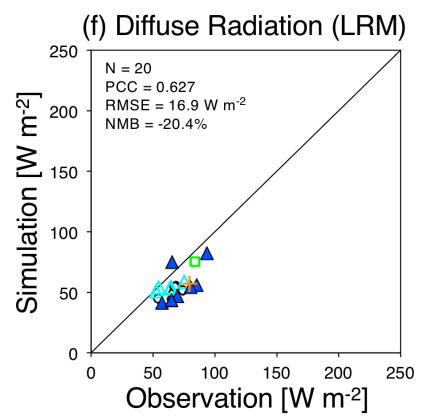

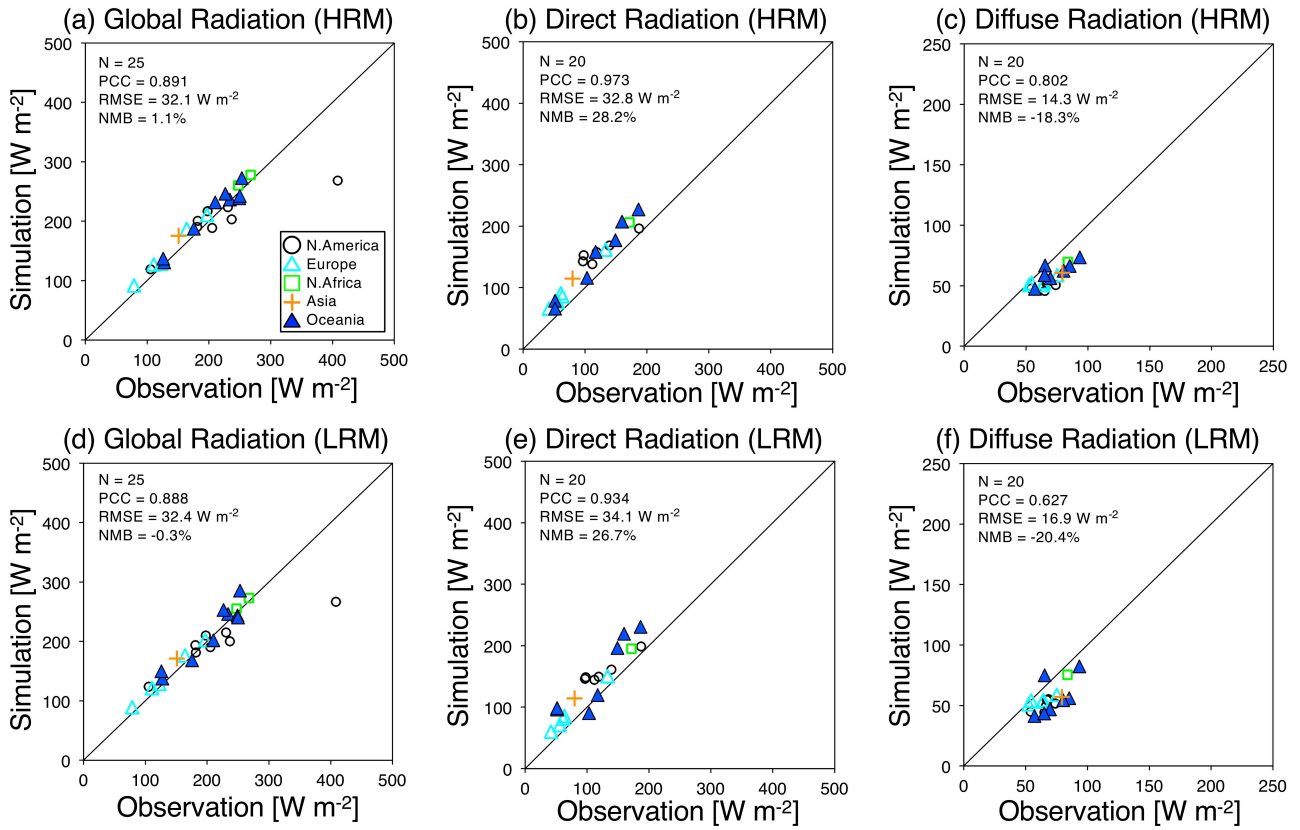

Figure 4: Scatterplots of the (a,d) global surface solar radiation (SSR), (b,e) direct and (c,f) diffuse radiation fluxes between the BSRN measurements and NICAM simulations (HRM and LRM) for global annual averages. The different colors and marks reflect the sites in the different regions explained in panel (a). The numbers located in the upper-left corner in each panel represent the statistical metrics: the sampling number (N), PCC, RMSE and NMB. All units are in W m<sup>-2</sup>.



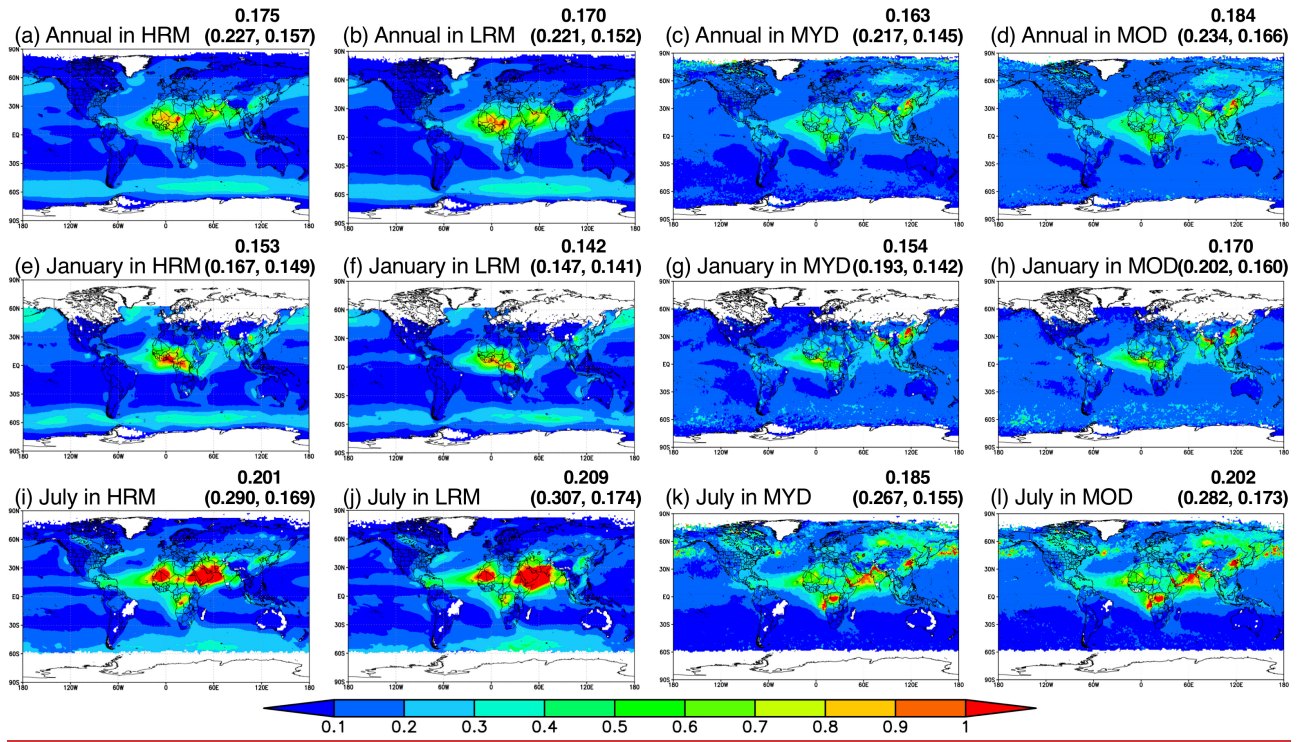

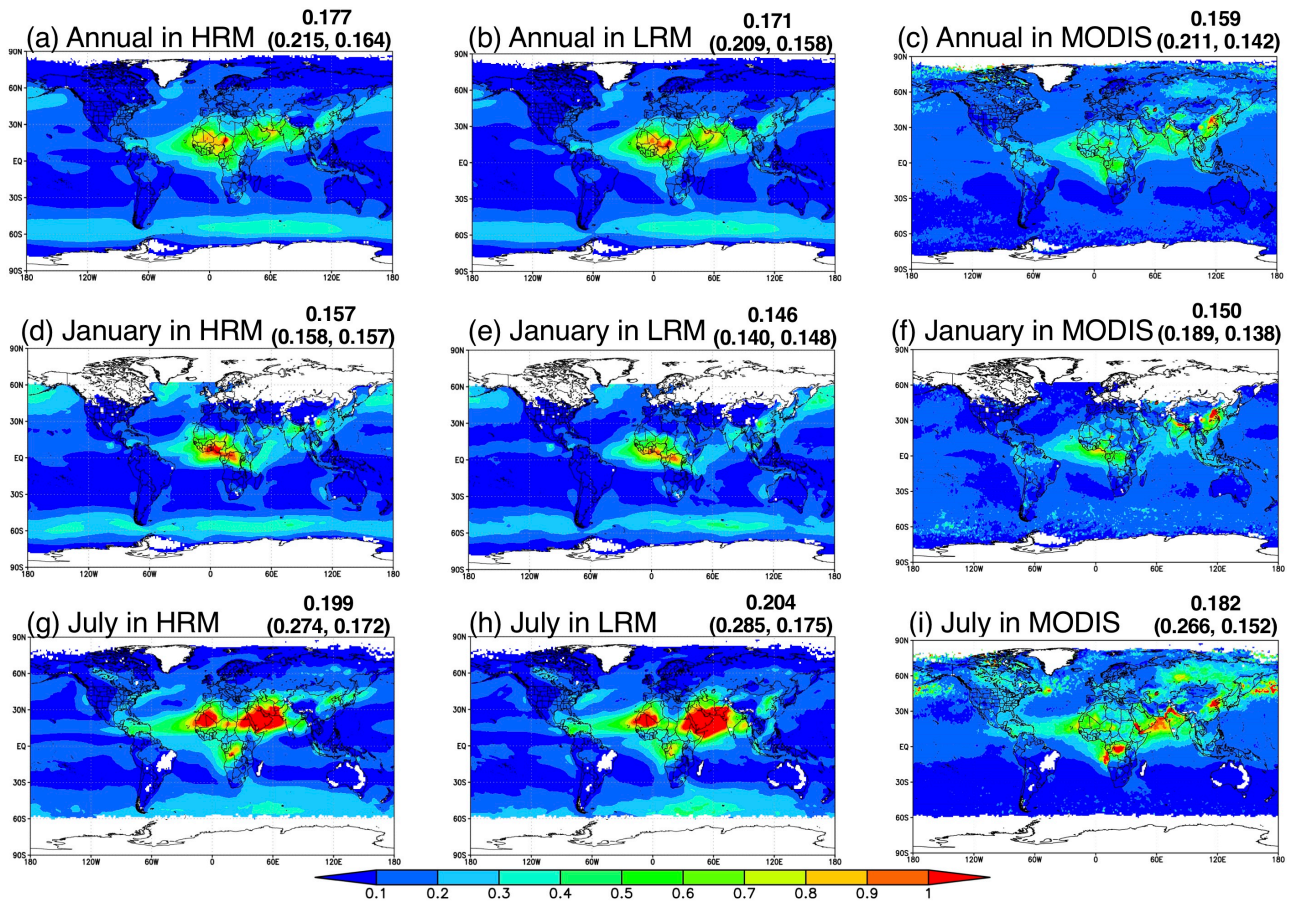

**Figure 5:** Global distributions of the annual, January and July averages of the AOT simulated by the HRM and LRM and retrieved from MODIS/Aqua (MYD) and MODIS/Terra (MOD) Same as Figure 2 but for the AOT. The reference data are the observations by MODIS/Terra. The model results in-for both the HRM and ~~the~~ LRM are horizontally interpolated onto the MODIS grids ( $1^{\circ} \times 1^{\circ}$ ). The numbers shown in the upper-right corner in each panel represent the annual and semiglobal averages ( $60^{\circ}\text{S}$ - $60^{\circ}\text{N}$ ); those in brackets represent the global land and ocean averages.

5

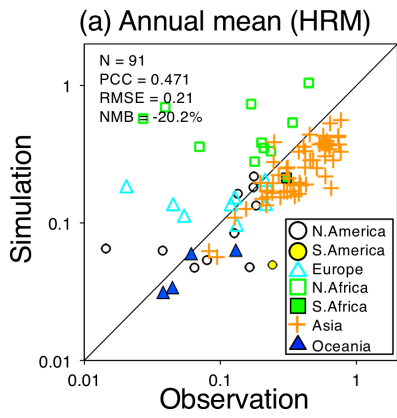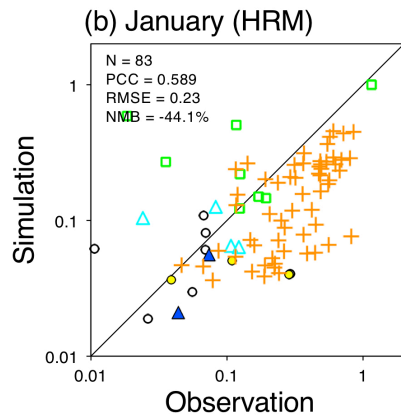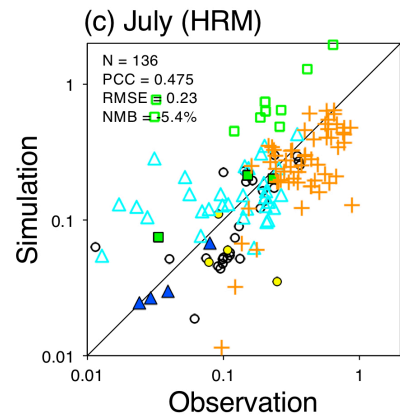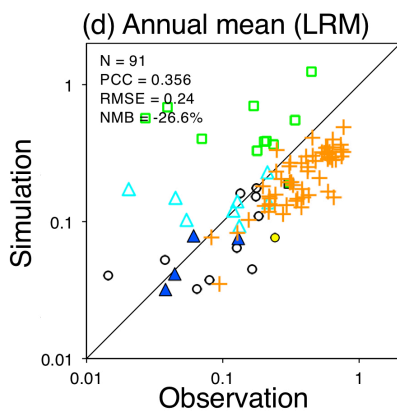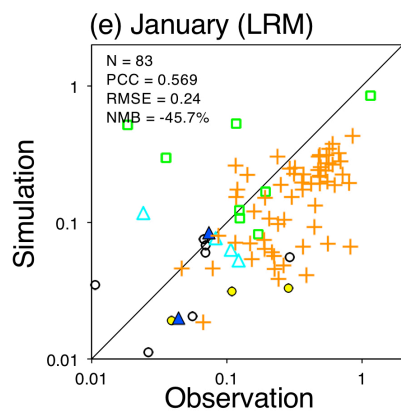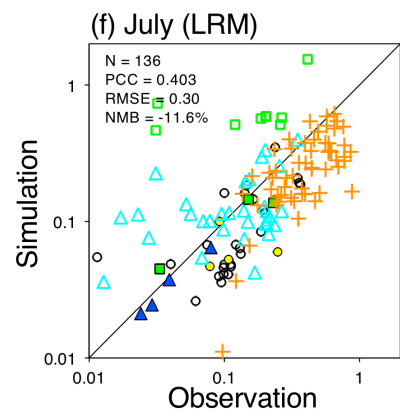

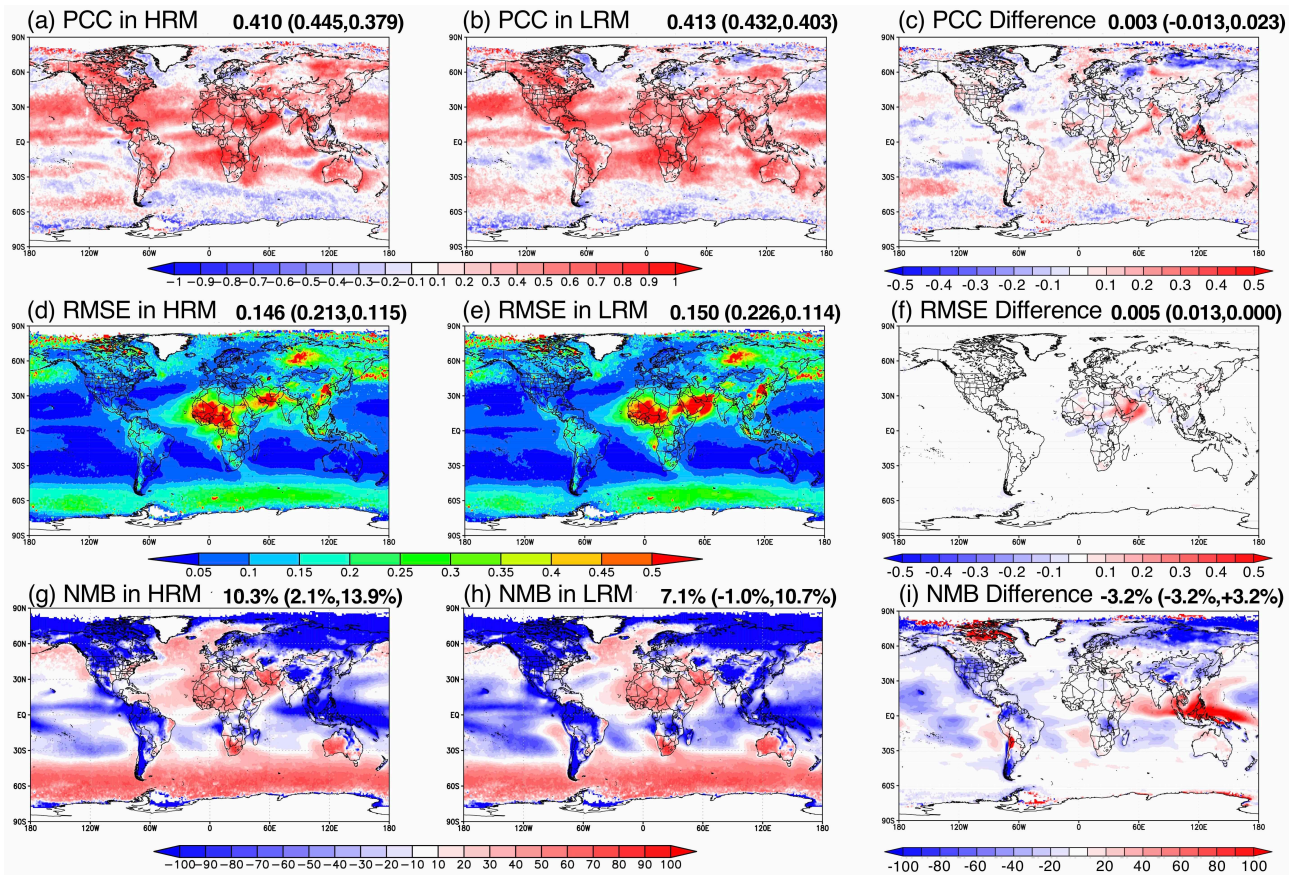

**Figure 6: Global distributions of the statistical metrics, i.e., the (a,b) PCC, (d,e) RMSE and (g,h) NMB, between the NICAM (HRM and LRM) simulations and MODIS retrievals for the annual averages and (c,f,i) the differences in these metrics between the HRM and LRM, i.e., LRM minus HRM. These metrics are calculated using data representing 12-monthly averages over three years in each grid ( $1^{\circ} \times 1^{\circ}$ ). The numbers shown in the upper right corner without the brackets in each panel represent semiglobal averages ( $60^{\circ}\text{S}$ – $60^{\circ}\text{N}$ ) without undefined grids in MODIS using the 12-monthly averages; those in brackets represent the global land and ocean averages.**

5

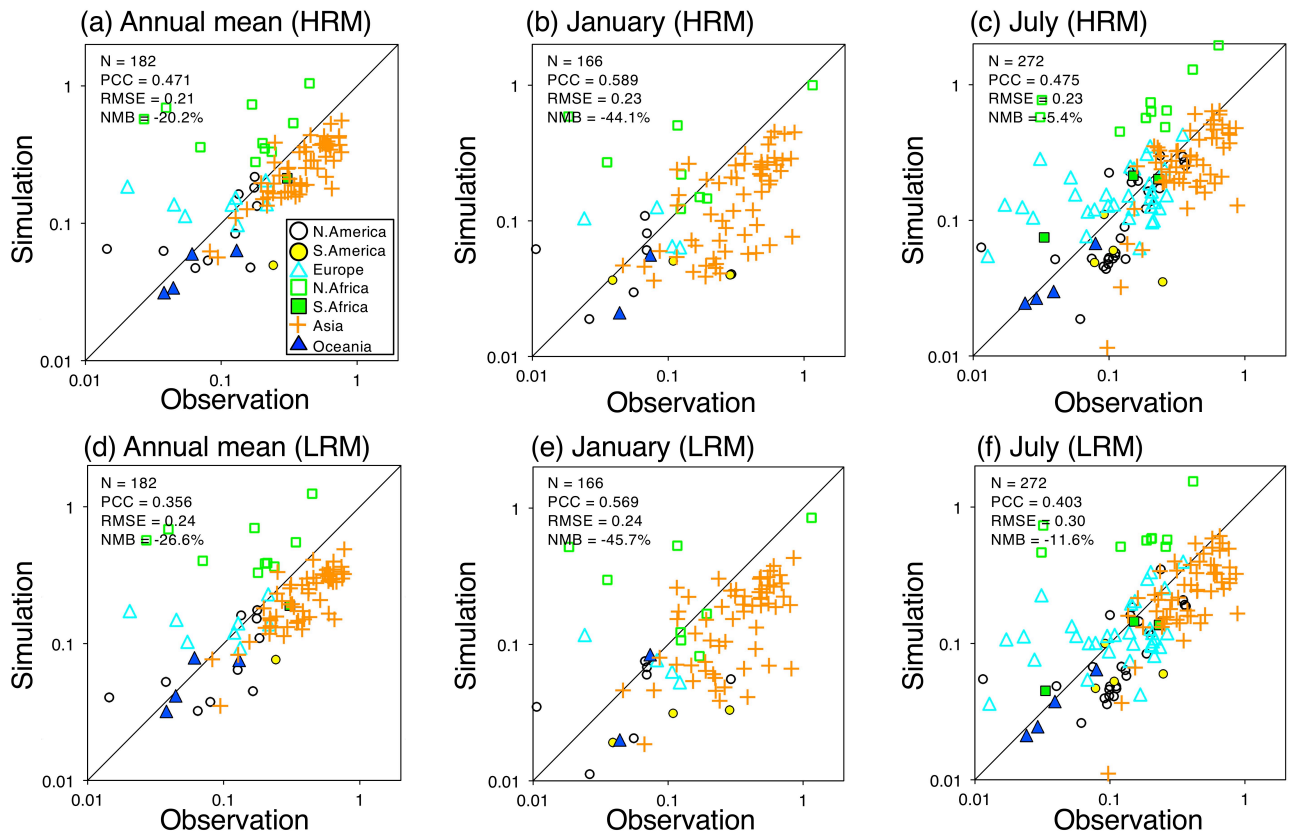

**Figure 76:** Scatterplot of the AOT at a wavelength of 500 nm between satellite measurements (AERONET, SKYNET, and CARSNET) and the NICAM (HRM and LRM) simulations for the annual, January and July averages. The different colors and marks reflect the sites in the different regions explained in panel (a). The numbers located in the upper-left corner in each panel represent the statistical metrics: N, PCC, RMSE and NMB. The statistical metrics are also shown in Table S5. The sites used for the comparison are shown in Figure 1.

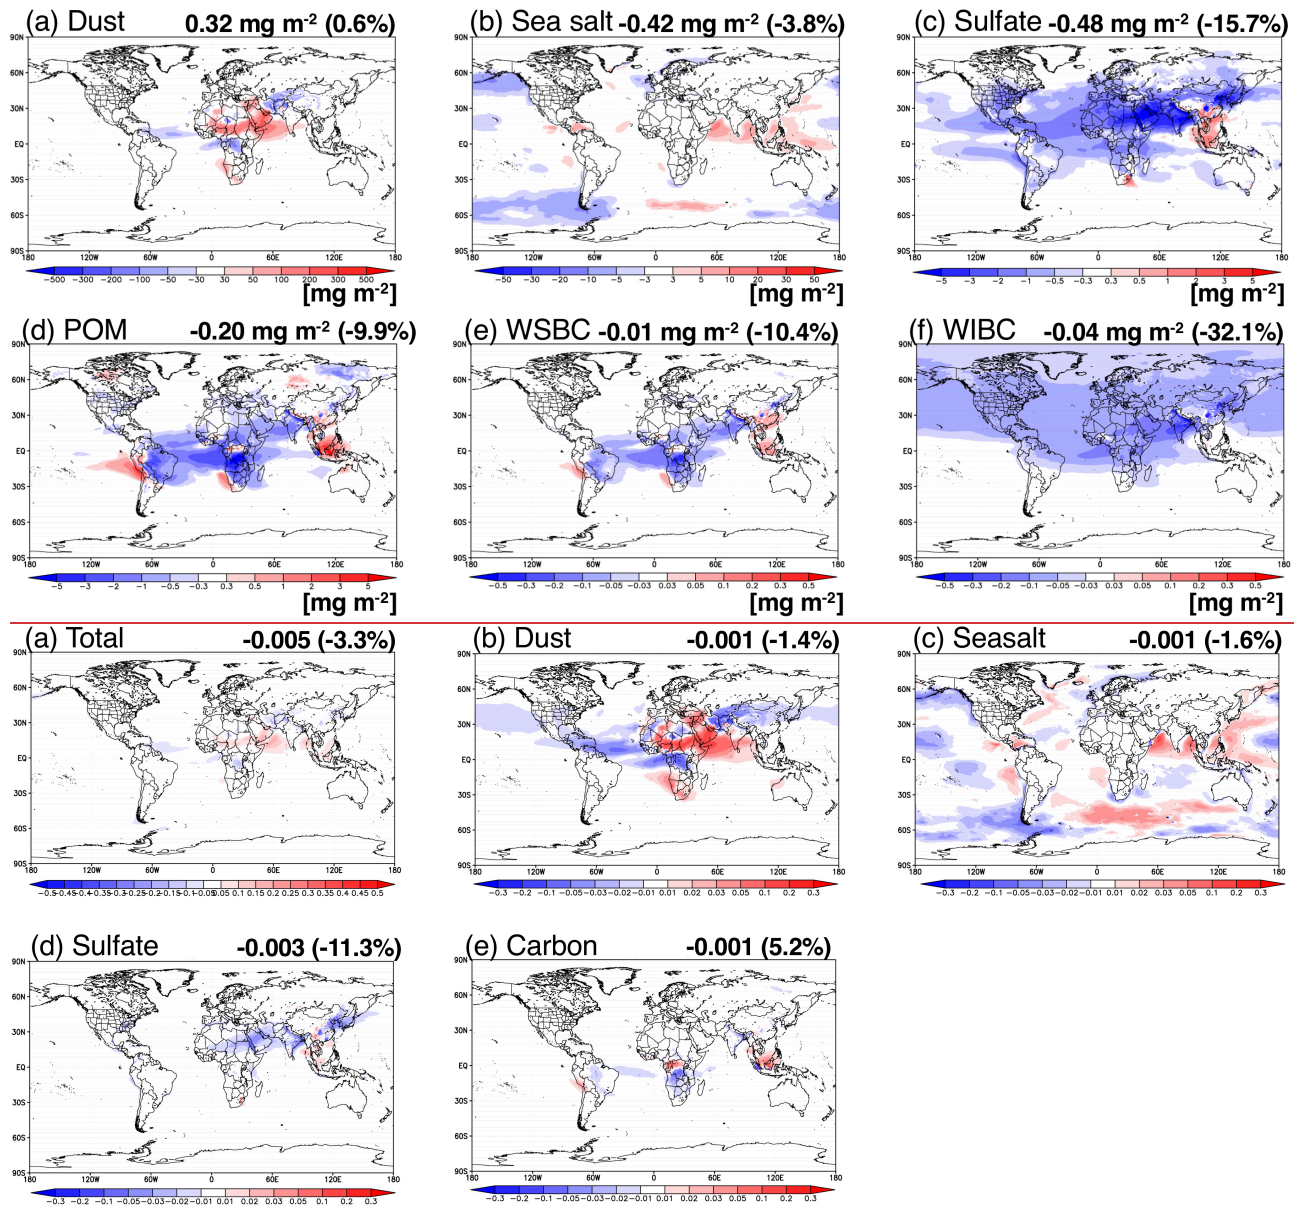

**Figure 8: Global distributions of the differences in the (a) total AOT and (b,c,d,e) AOT components (dust, sea salt, sulfate and total carbonaceous aerosols, respectively) between the HRM and LRM (LRM minus HRM) for the annual averages. The numbers shown in upper right corner in each panel represent the annual and global averages of the**

5

difference, and the numbers in brackets represent the annual and global averages of the relative difference in units of %.

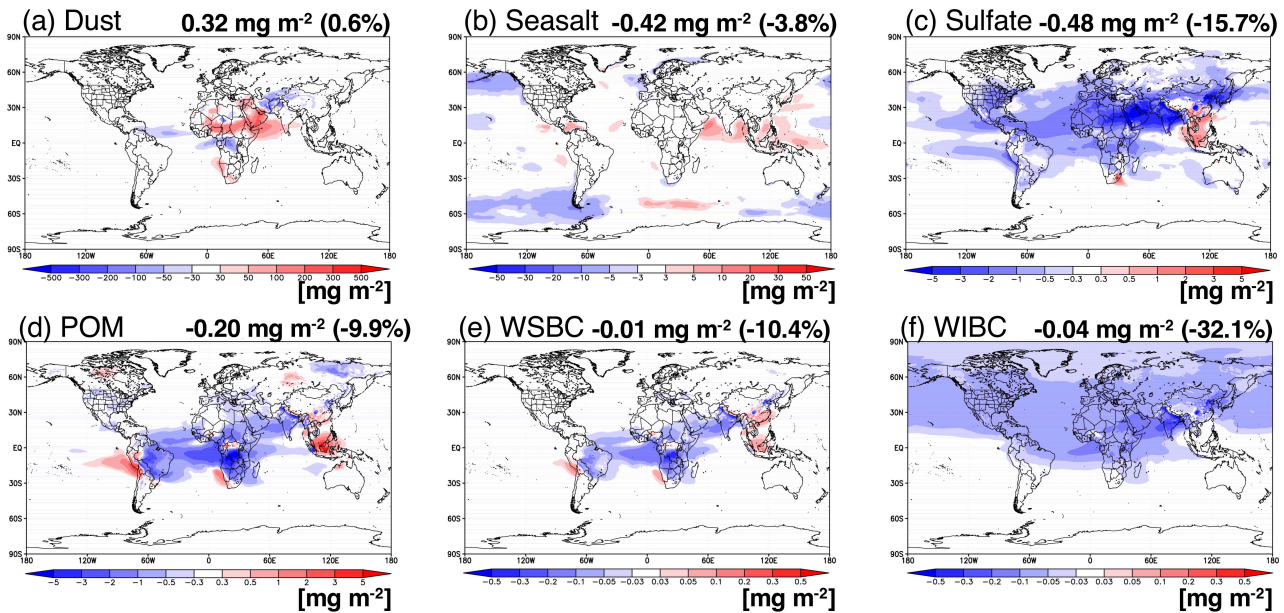

5 **Figure 97:** Global distribution of the differences in the mass loadings of (a) dust, (b) sea salt, (c) sulfate, (d) POM, (e) WSBC and (f) WIBC between the HRM and LRM (LRM minus HRM) for the annual averages with a grid of  $0.5^\circ \times 0.5^\circ$ . The numbers shown in the upper-right corner in each panel represent the annual and global averages of the difference in units of  $\text{mg m}^{-2}$ , and the numbers in brackets represent the annual and global averages of the relative difference in units of %.

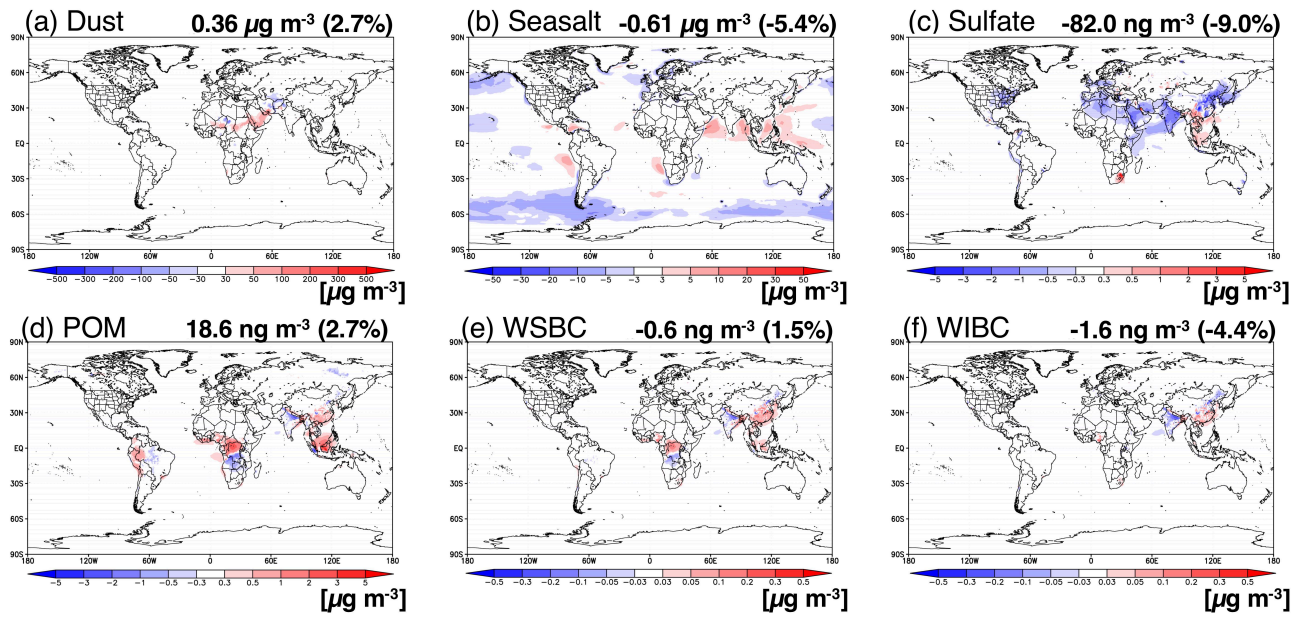

Figure 10: Same as Figure 9 but for the surface mass concentrations in units of  $\mu\text{g m}^{-3}$ .



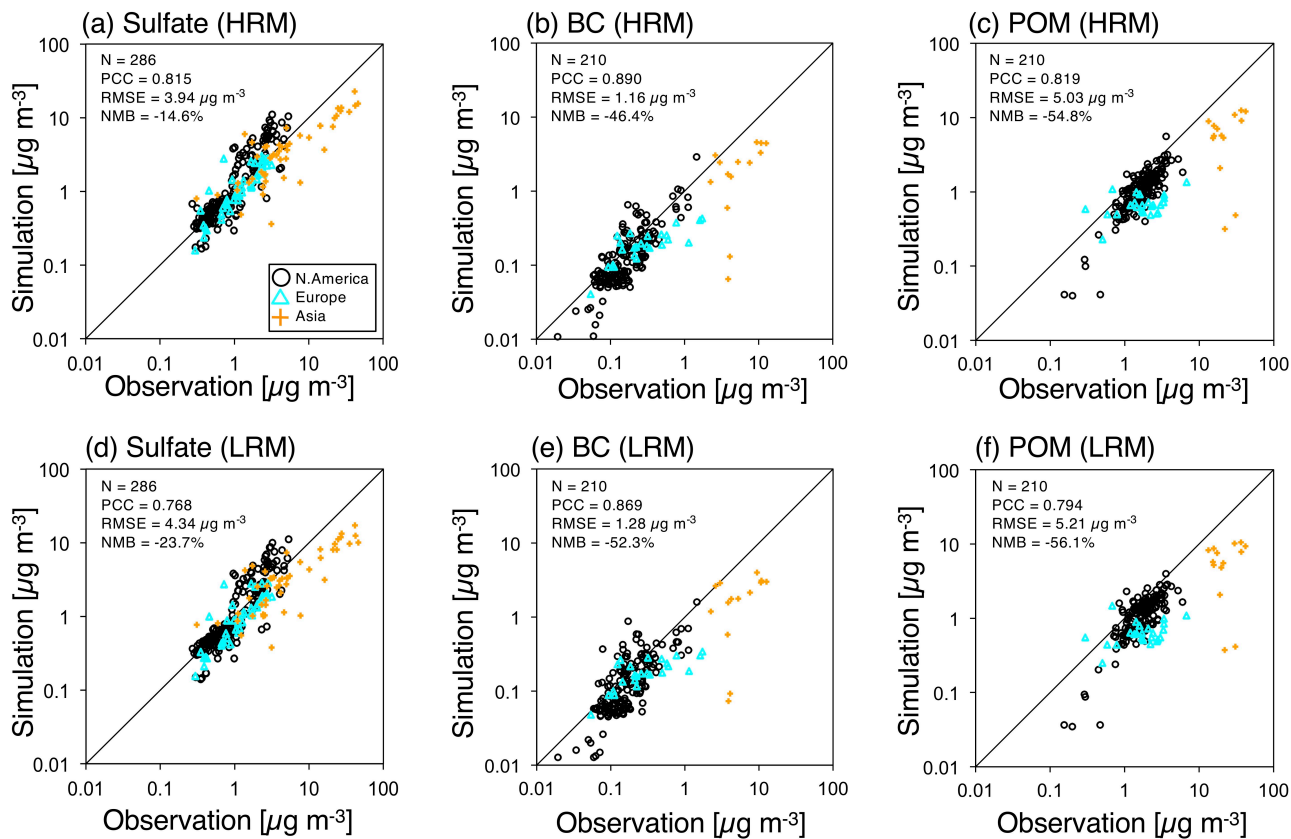

Figure 148: Scatterplots of the surface aerosol mass concentrations (sulfate, BC and POM) between satellite measurements (IMPROVE, EMEP, EANET and CAWNET) and the NICAM (HRM and LRM) simulations for the annual averages. All units are in  $\mu\text{g m}^{-3}$ . The different colors and marks reflect the sites in the different regions explained in panel (a). The numbers located in the upper-left corner in each panel represent the statistical metrics: N, PCC, RMSE and NMB. The statistical metrics are also shown in Table S6. The sites employed for the comparison are shown in Figure 1.

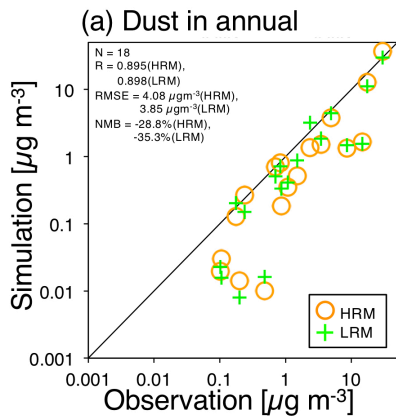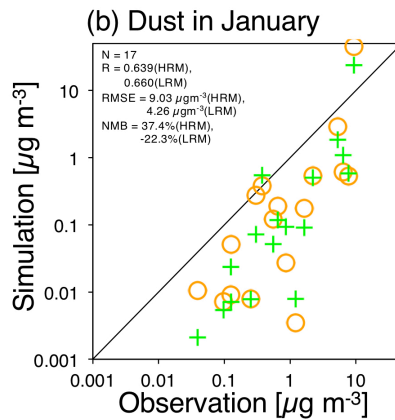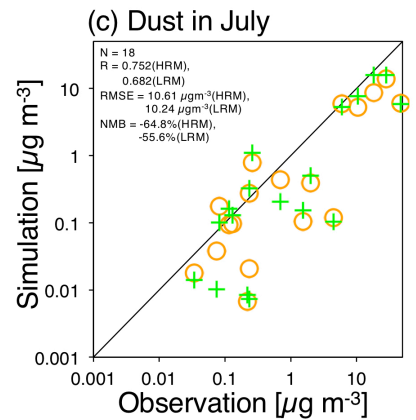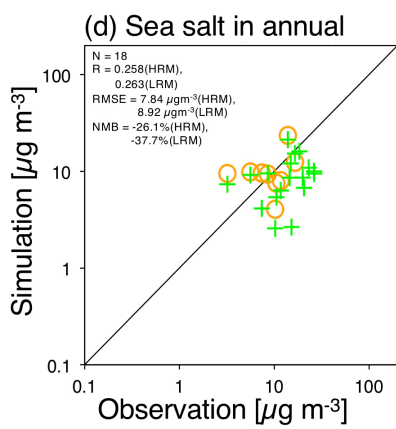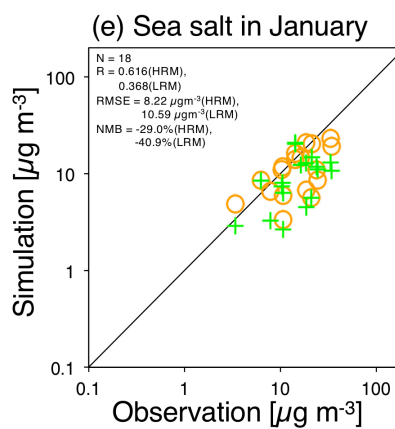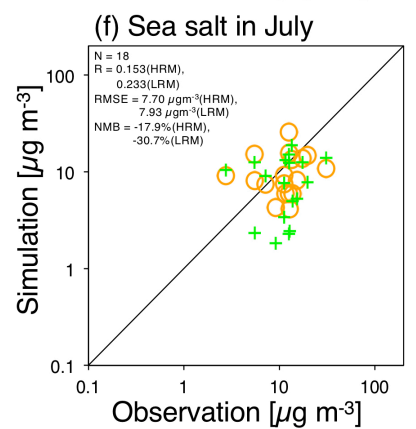

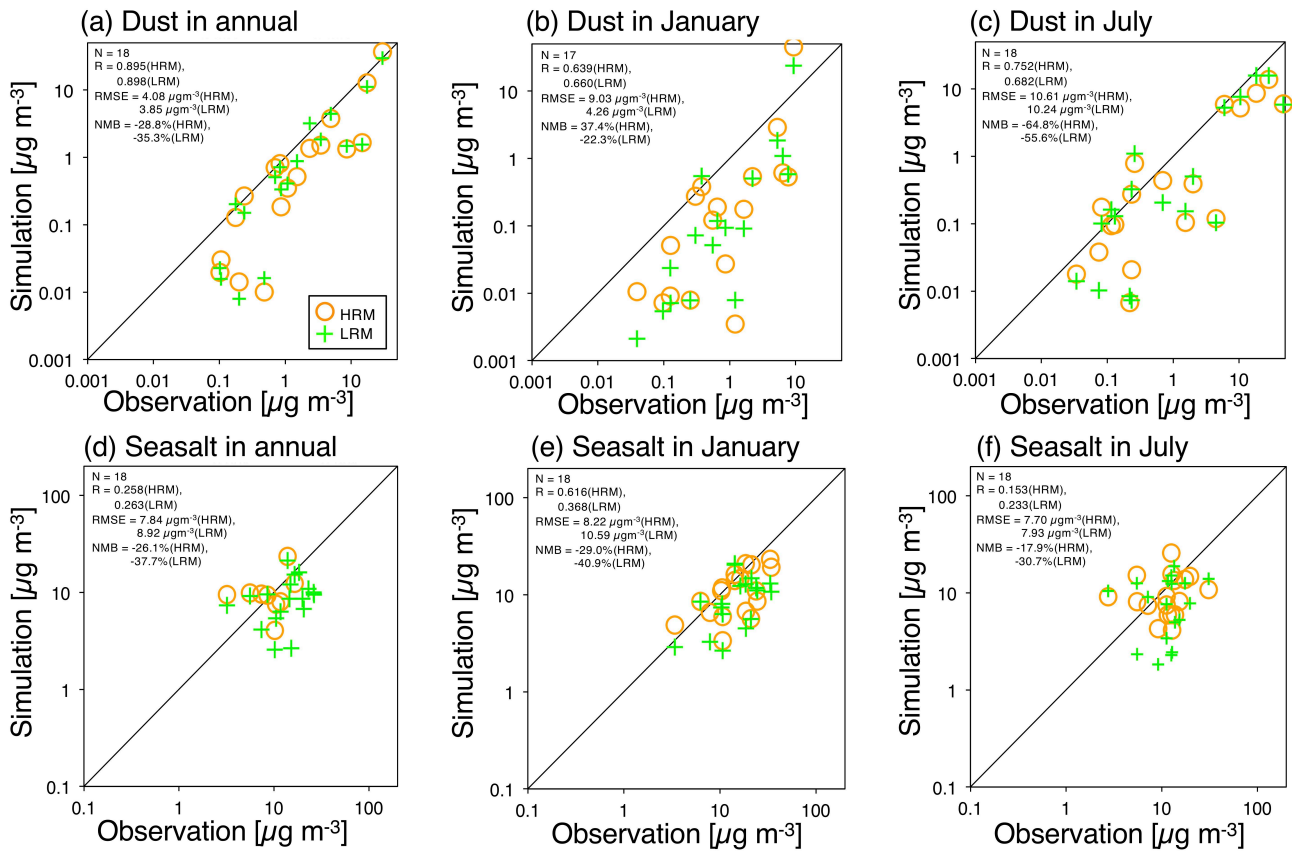

**Figure 912:** Scatterplots of the surface aerosol mass concentrations (dust and sea salt) between the measurements (the network managed by the University of Miami) and NICAM simulations (HRM in orange and LRM in green) for the annual, January and July averages. All units are in  $\mu\text{g m}^{-3}$ . The numbers located in the upper-left corner in each panel represent the statistical metrics: N, PCC, RMSE and NMB. The statistical metrics are also shown in Tables S7 and S8. The sites employed for the comparison are shown in Figure 1.

5

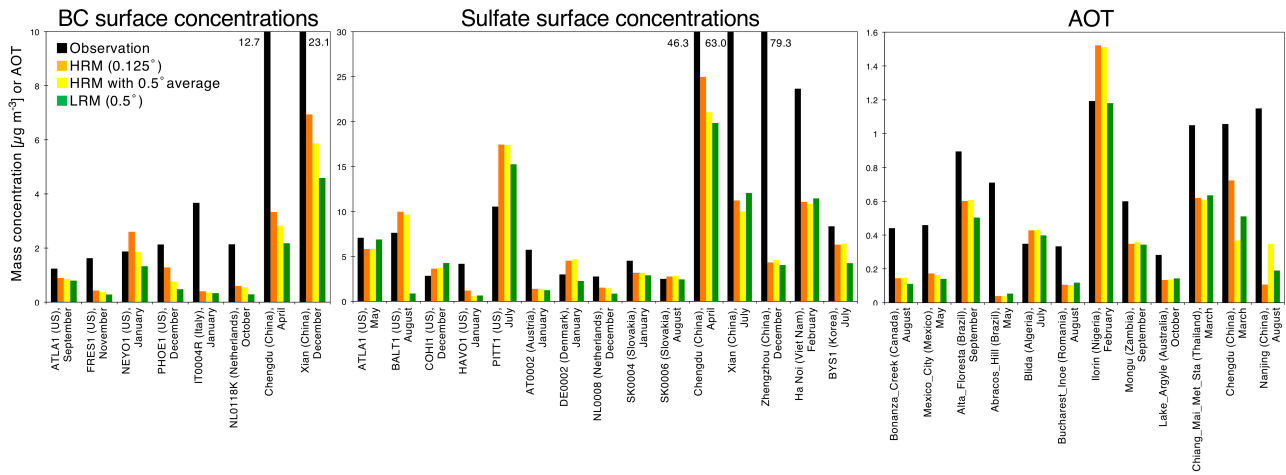

Figure 1310: Multiple comparisons of the BC and sulfate surface mass concentrations ( $\mu\text{g m}^{-3}$ ) and AOTs at the polluted sites using the HRM with ~~the~~an original grid of  $0.125^\circ \times 0.125^\circ$ , the HRM with ~~the~~an interpolated grid of  $0.5^\circ \times 0.5^\circ$  (denoted as ‘HRM with  $0.5^\circ$  average’), the LRM with ~~the~~an original grid of  $0.5^\circ \times 0.5^\circ$ , and the observations.

5 The abscissa shows the selected sites, which were selected by choosing the highest values at the sites in each domain and month.

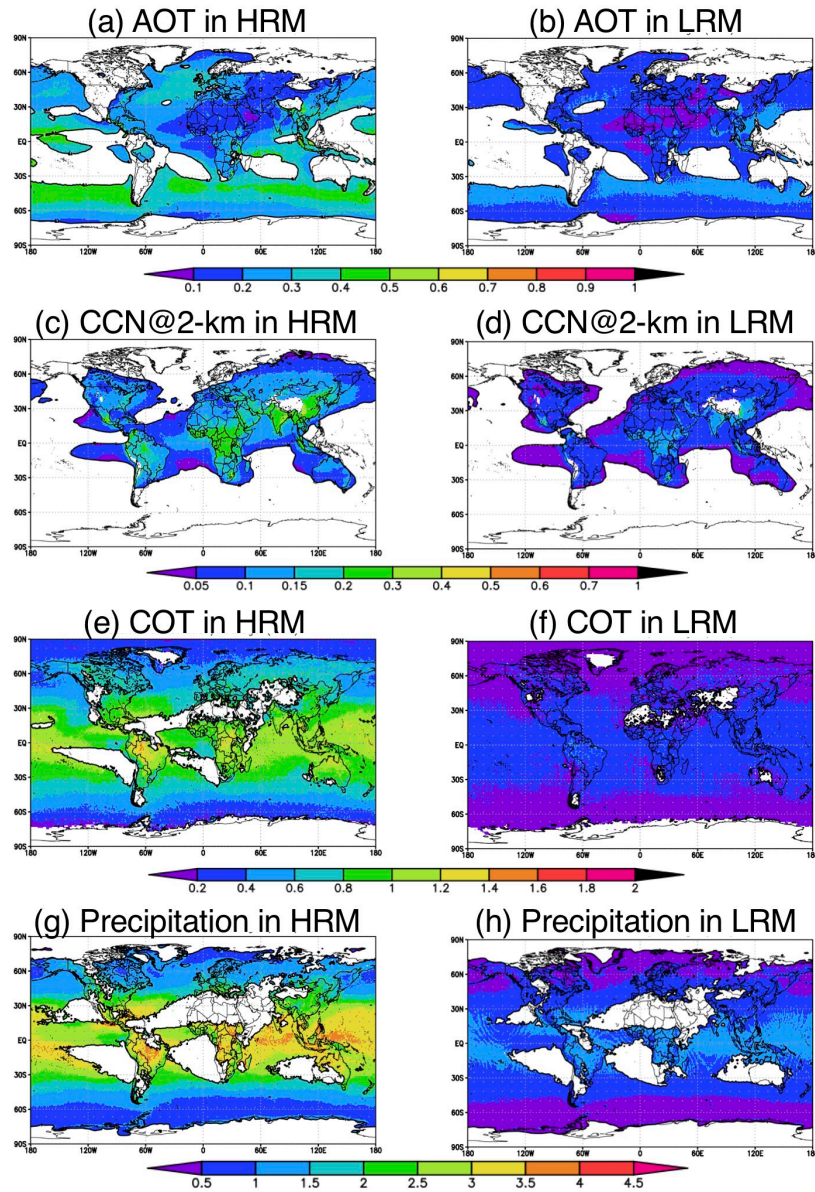

Figure 1411: Global distributions of the ratio of the standard deviation to the average for the (a,b) AOT, (c,d) CCN at a height of approximately 2 km, (e,f) COT and (g,h) precipitation in  $1^\circ \times 1^\circ$  grids using the 6-hourly output of both the HRM and the LRM for a 1-year integration period. All units are in %. The transparency represents lower absolute values of each parameter: AOTs of  $<0.1$  in panels (a,b), CCN of  $<40 \text{ cm}^{-3}$  in panels (c,d), COTs of  $<5$  in panels (e,f), and precipitation fluxes of  $<1 \text{ mm day}^{-1}$  in panels (g,h).

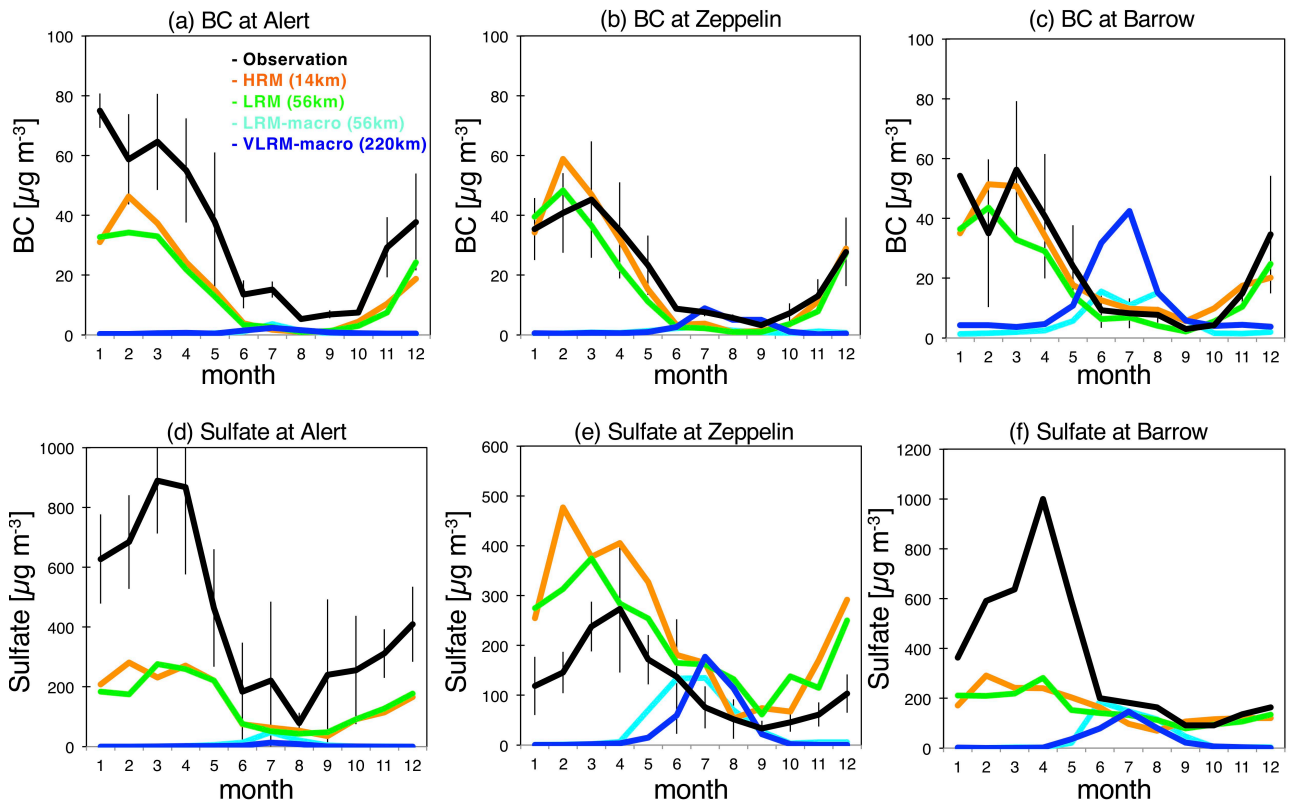

5 **Figure 1512:** Monthly averages of BC and sulfate concentrations simulated by the HRM, LRM, LRM with a cloud macrophysics module (LRM-macro, which is defined in section 2.1) and VLRM-macro (NICAM simulations using a

10 horizontal grid spacing of 220 km with the cloud macrophysics module, which is defined in section 2.1) at three Arctic sites: Alert (62.3°W, 82.5°N), Zeppelin (11.9°E, 78.9°N) and Barrow (157.0°W, 71.3°N). The BC is measured as the equivalent BC at 530 nm by a particle soot absorption photometer (PSAP) for 2007-2010 under the EMEP and WDCS databases (<http://ebas.nilu.no>). The sulfate concentrations are averaged at Alert for 2000-2006 by the Canadian Aerosol Baseline Measurement (CABM) program, at Zeppelin for 2005-2013 by EMEP, and at Barrow for

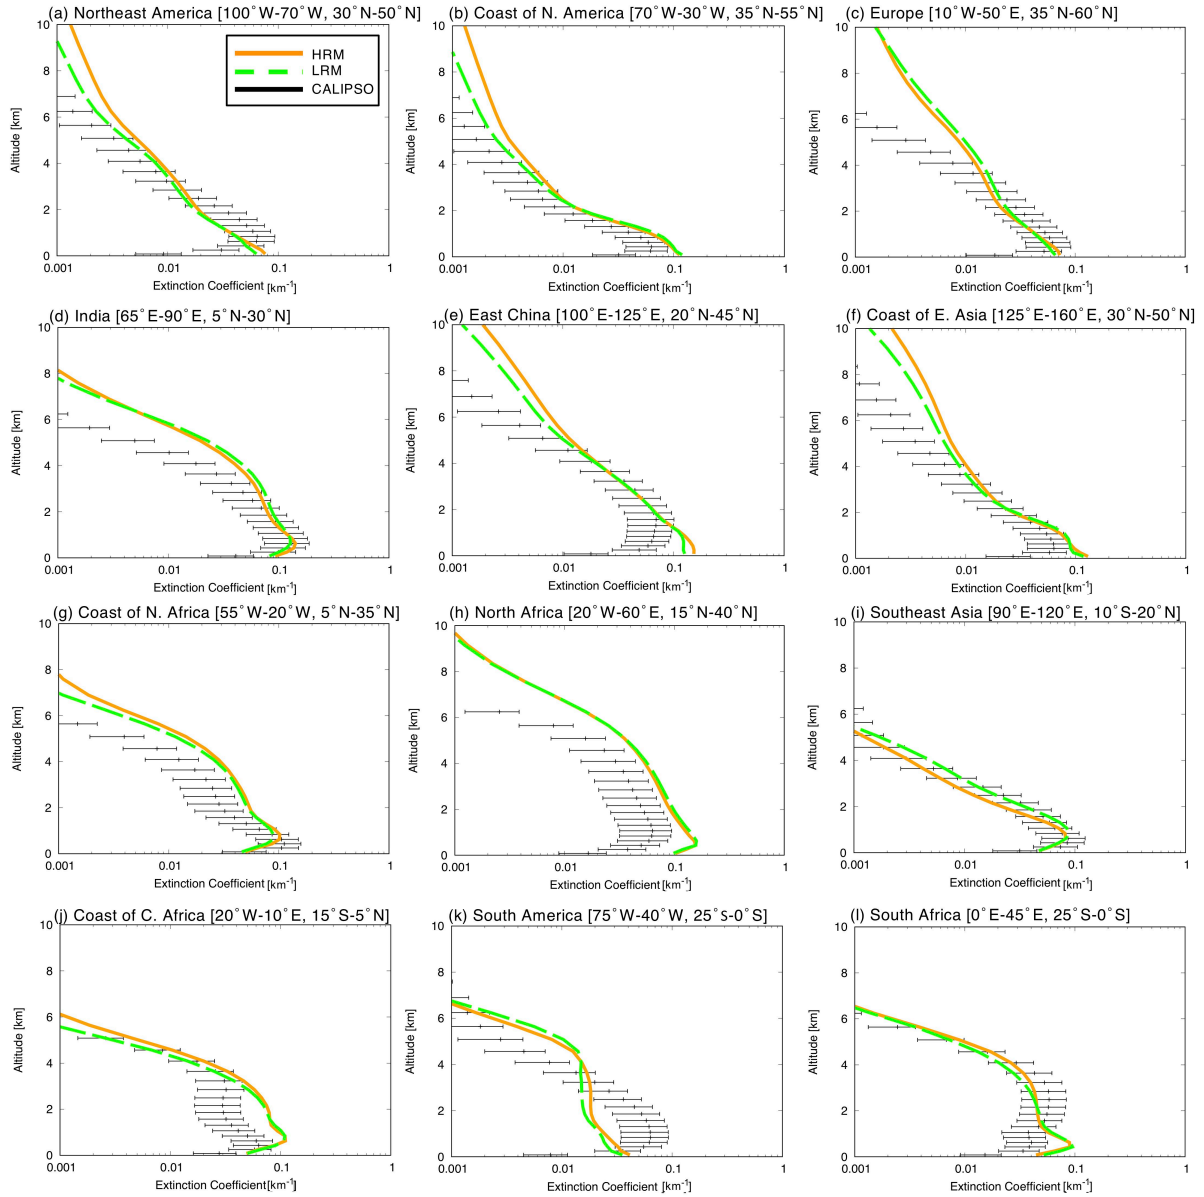

**Figure 1613:** Vertical distributions of the annually averaged aerosol extinction coefficients from the NICAM simulations (HRM in orange and LRM in green) and from CALIOP/CALIPSO observations (black) in 12 different regions. The definition of the region is based on Koffi et al. (2016), except for panels (i) Southeast Asia and (j) the coast of Central Africa. The CALIOP-retrieved results are shown as bars, which are the standard deviation of the results from a 3-year integration period.

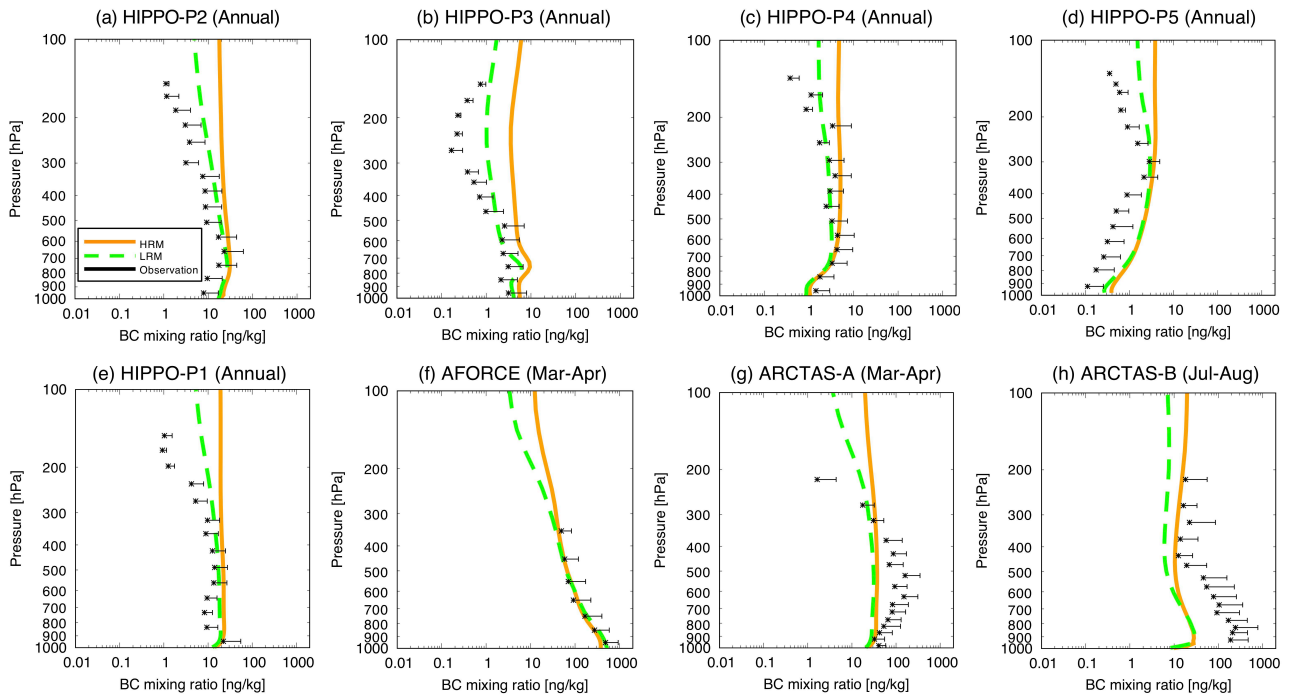

**Figure 1714:** Vertical distribution of the BC mass concentrations from the NICAM simulations (HRM in orange and LRM in green) and from flight campaign measurements (the groups by NOAA and the University of Tokyo) in various regions and seasons. The definitions of the target domain and period in each panel are as follows: (a) 20°N-60°N, 160°E-150°W, (b) 20°S-20°N, 160°E-150°W, (c) 60°S-20°S, 160°E-150°W, (d) 60°S-80°S, 160°E-150°W, and (e) 60°N-90°N, 160°E-150°W in annual averages of 2009, (f) 32°N-37°N, 122°E-126°E in March 2012 and 26°N-32°N, 126°E-132°E in April 2012, (g) 60°N-80°N, 165°W-70°W in March-April 2008 and (h) 45°N-87°N, 135°W-45°W in July-August 2008. The abscissa shows the mass concentration in units of  $\mu\text{g m}^{-3}$ , and the ordinate shows the air pressure in units of hPa.



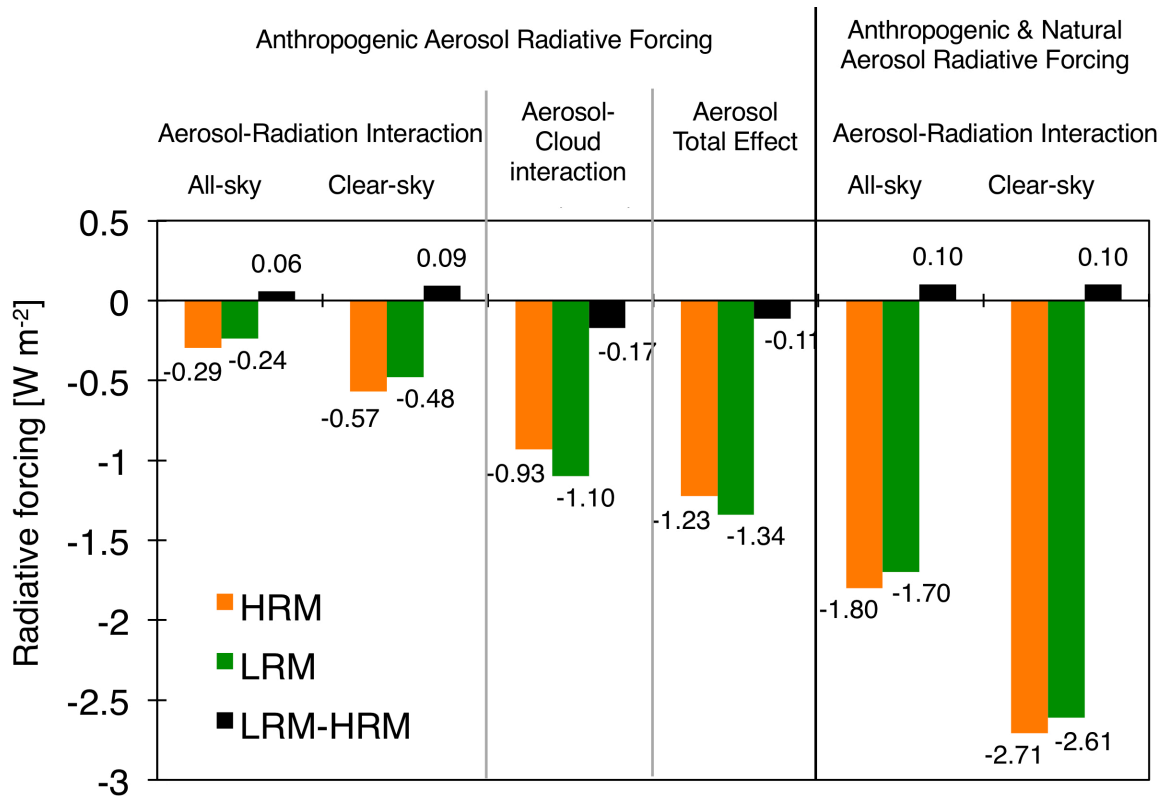

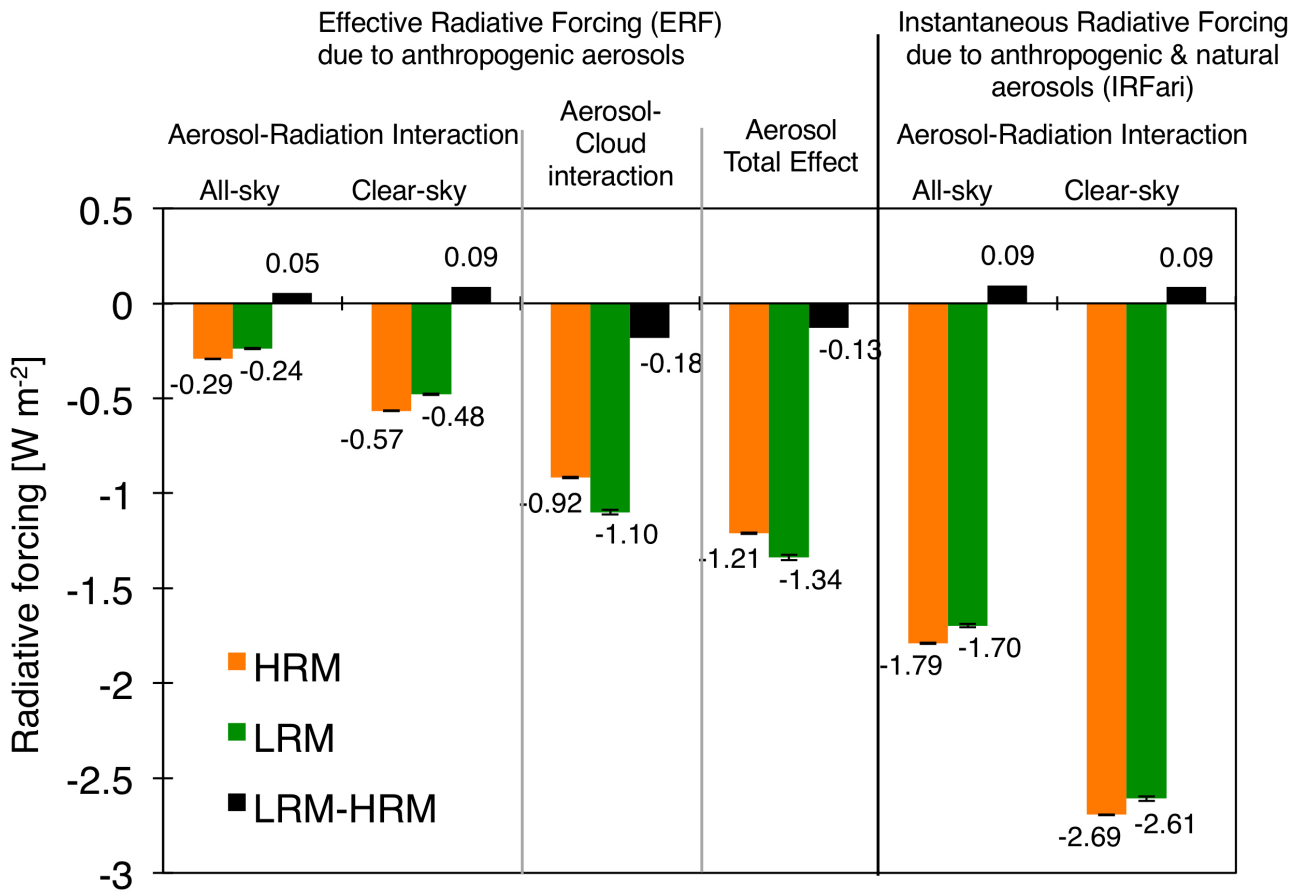

Figure 1815: Annual global average ARFs for both ARIs and ACIs, i.e., IRFari, ERFari, and ERFaci, against anthropogenic and total aerosols, i.e., anthropogenic and natural sources, under all-sky and clear-sky conditions at the TOA using the HRM (orange), the LRM (green) and the difference (LRM minus HRM in black). All units are in

5  $\text{W m}^{-2}$ . The uncertainties are given as the global confidence intervals with a significance threshold of 95%.

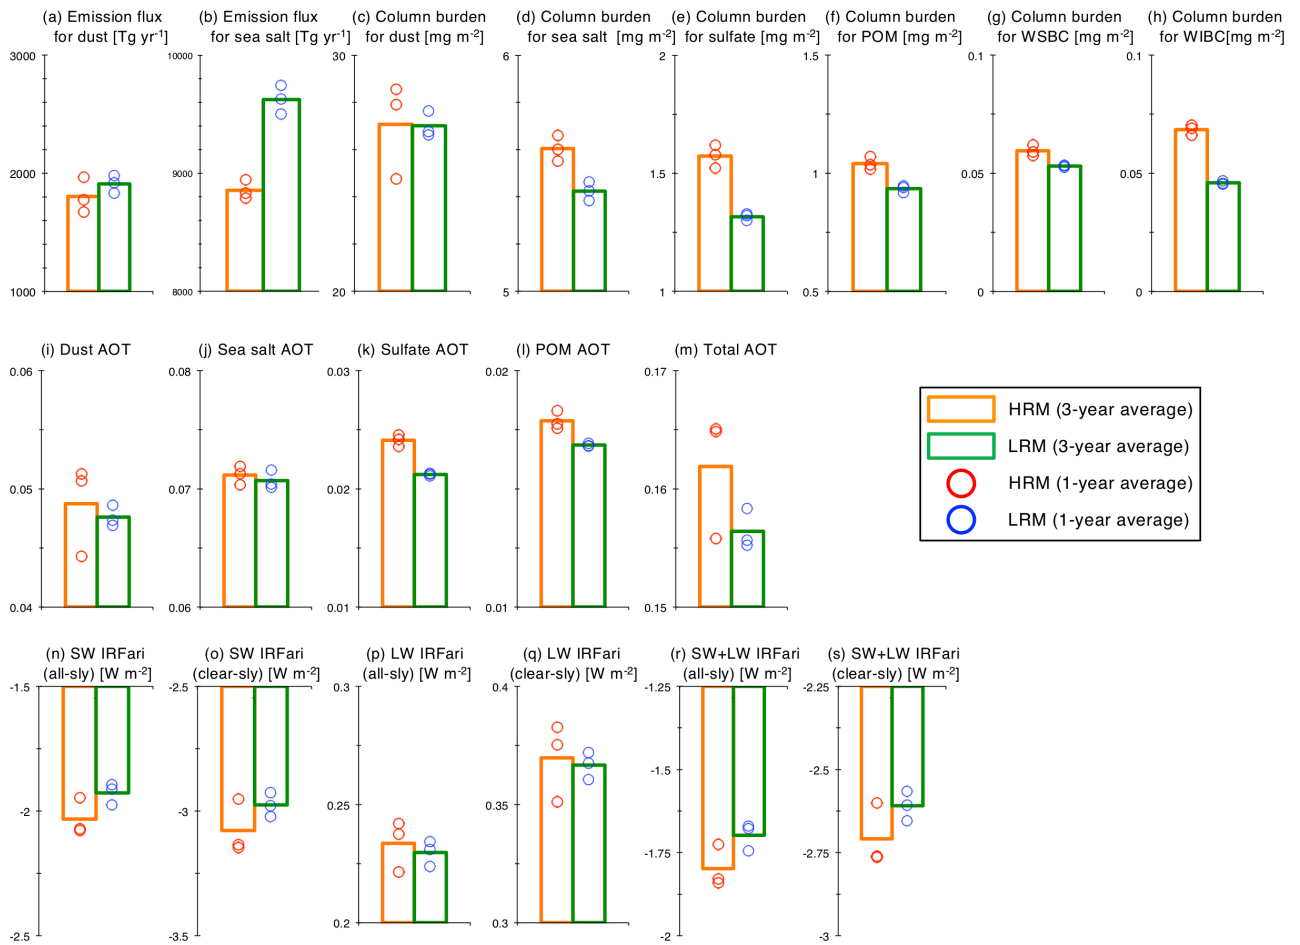

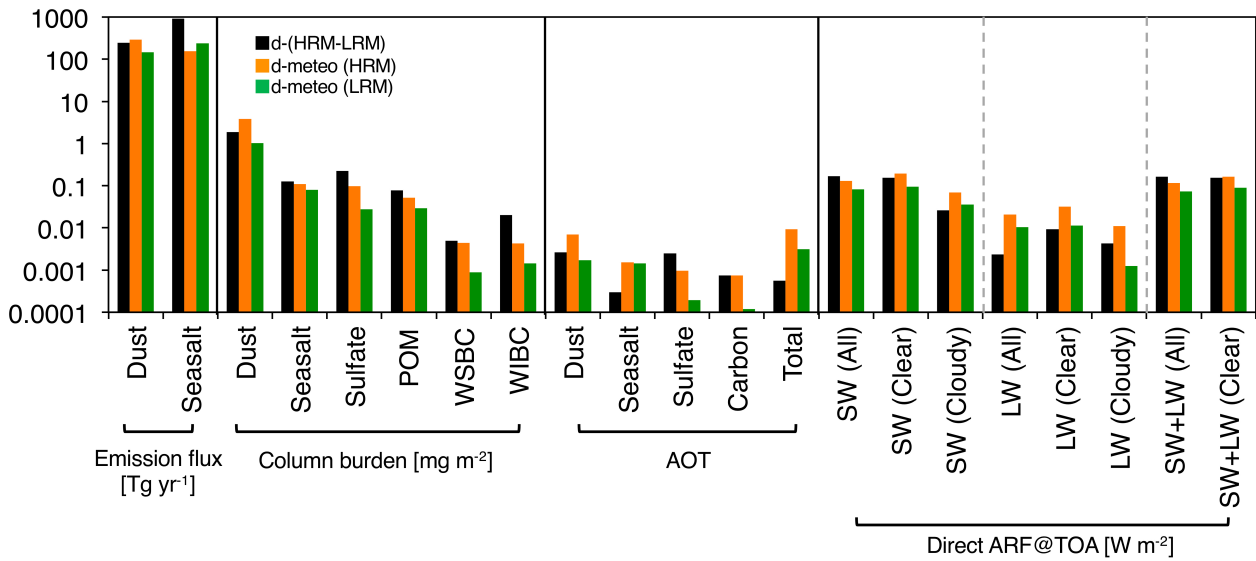

**Figure 1916: Variabilities-Global annual averages** of the emission fluxes (for dust and sea salt), column burdens (for dust, sea salt, sulfate, OC, WSBC and WIBC), AOTs (for dust, sea salt, sulfate, carbon and total amount) and direct ARF (IRFari) at the TOA (shortwave (SW), longwave (LW) and total (SW plus LW) under all-sky and, clear-sky and 5 cloudy-sky-conditions) by perturbing the meteorological fields, i.e., considering the variabilities for the 3-year integration-averages as well as each 1-year average in both the HRM and LRM of the NICAM. The results are shown in three panels: ‘d-(HRM-LRM)’ represents the difference between the HRM and LRM, ‘d-meteo (HRM)’ represents the difference among the 3 years of integration results in the HRM, and ‘d-meteo (LRM)’ represents the difference among the 3 years of integration results in the LRM.
